# Supplementary material for: Vibration Analysis of Axially Functionally Graded Non-Prismatic Timoshenko Beams Using the Finite Difference Method
Source: Preprints.org preprint supplement (doi:10.20944/preprints202105.0442.v1), 2021-05-19
Supplement: Supplementary file 1 [file supplementary]

## Sheet: Fixed-free beam
		Vibration analysis of a tapered fixed-free Timoshenko beam
										Governing equations
	W-F FDM approximation
		Nine-point grid
	n =	8		n =	0.3
		0.125		k =	0.833333
		0.0312		Er = E0 =	200	Gpa
	kRIr =	0.01		E1 =	70	Gpa
				rr = r0 =	5700	kg/m3
		0.500801		r1 =	2702	kg/m3
		4.8744				Determinant =	-1.19375e+08
					PSM	Shahba et al.	9 pt
		0.00580073		0.371247	5.0170	5.0178	4.8744
		0.2
			Nodes	1		2		3		4		5		6		7		8		9
				0		0.125		0.25		0.375		0.5		0.625		0.75		0.875		1
				1		0.903688		0.814506		0.732094		0.6561		0.586182		0.522006		0.46325		0.4096
				1		0.950625		0.9025		0.855625		0.81		0.765625		0.7225		0.680625		0.64
				1		0.991782		0.967127		0.926036		0.868509		0.794545		0.704145		0.597308		0.474035
				1		0.989844		0.959375		0.908594		0.8375		0.746094		0.634375		0.502344		0.35
				-0.05		-0.0675645		-0.0822344		-0.0941621		-0.1035		-0.1104		-0.115016		-0.117498		-0.118
				-0.1		-0.110101		-0.115344		-0.116523		-0.114362		-0.109517		-0.102578		-0.0940758		-0.08448
		W0	hkF0	W1	hkF1	W2	hkF2	W3	hkF3	W4	hkF4	W5	hkF5	W6	hkF6	W7	hkF7	W8	hkF8	W9	hkF9	W10	hkF10
	Gov Eq 1 (1)	0.513321	0.250401	-0.995802	0.0250401	0.488281	-0.250401	0	0	0	0	0	0	0	0	0	0	0	0	0	0	0	0
	Gov Eq 2 (1)	-0.250401	1.05	0	-2.49709	0.250401	0.95	0	0	0	0	0	0	0	0	0	0	0	0	0	0	0	0
	Gov Eq 1 (2)	0	0	0.488157	0.23562	-0.937009	0.0338364	0.454321	-0.23562	0	0	0	0	0	0	0	0	0	0	0	0	0	0
	Gov Eq 2 (2)	0	0	-0.23562	0.94956	0	-2.25693	0.23562	0.839459	0	0	0	0	0	0	0	0	0	0	0	0	0	0
	Gov Eq 1 (3)	0	0	0	0	0.454203	0.216806	-0.86216	0.0411831	0.41302	-0.216806	0	0	0	0	0	0	0	0	0	0	0	0
	Gov Eq 2 (3)	0	0	0	0	-0.216806	0.839089	0	-1.99352	0.216806	0.723745	0	0	0	0	0	0	0	0	0	0	0	0
	Gov Eq 1 (4)	0	0	0	0	0	0	0.412909	0.194665	-0.774065	0.0471565	0.365752	-0.194665	0	0	0	0	0	0	0	0	0	0
	Gov Eq 2 (4)	0	0	0	0	0	0	-0.194665	0.723438	0	-1.71717	0.194665	0.606915	0	0	0	0	0	0	0	0	0	0
	Gov Eq 1 (5)	0	0	0	0	0	0	0	0	0.365648	0.169866	-0.675381	0.0518329	0.313815	-0.169866	0	0	0	0	0	0	0	0
	Gov Eq 2 (5)	0	0	0	0	0	0	0	0	-0.169866	0.606665	0	-1.43658	0.169866	0.492303	0	0	0	0	0	0	0	0
	Gov Eq 1 (6)	0	0	0	0	0	0	0	0	0	0	0.313716	0.143036	-0.568615	0.0552887	0.258427	-0.143036	0	0	0	0	0	0
	Gov Eq 2 (6)	0	0	0	0	0	0	0	0	0	0	-0.143036	0.492105	0	-1.15904	0.143036	0.382588	0	0	0	0	0	0
	Gov Eq 1 (7)	0	0	0	0	0	0	0	0	0	0	0	0	0.258335	0.114768	-0.456119	0.0576	0.200735	-0.114768	0	0	0	0
	Gov Eq 2 (7)	0	0	0	0	0	0	0	0	0	0	0	0	-0.114768	0.382437	0	-0.890466	0.114768	0.279859	0	0	0	0
	Gov Eq 1 (8)	0	0	0	0	0	0	0	0	0	0	0	0	0	0	0.200649	0.0856139	-0.340097	0.0588432	0.141806	-0.0856139	0	0
	Gov Eq 2 (8)	0	0	0	0	0	0	0	0	0	0	0	0	0	0	-0.0856139	0.279749	0	-0.635622	0.0856139	0.185673	0	0
	Gov Eq 1 (9)	0	0	0	0	0	0	0	0	0	0	0	0	0	0	0	0	0.141727	0.0560897	-0.222599	0.0590946	0.0826322	-0.0560897
	Gov Eq 2 (9)	0	0	0	0	0	0	0	0	0	0	0	0	0	0	0	0	-0.0560897	0.1856	0	-0.398179	0.0560897	0.10112
	Bo Co 1 (1)	0	0	1	0	0	0	0	0	0	0	0	0	0	0	0	0	0	0	0	0	0	0
	Bo Co 2 (1)	0	0	0	1	0	0	0	0	0	0	0	0	0	0	0	0	0	0	0	0	0	0
	Bo Co 1 (9)	0	0	0	0	0	0	0	0	0	0	0	0	0	0	0	0	0	1	0	0	0	-1
	Bo Co 2 (9)	0	0	0	0	0	0	0	0	0	0	0	0	0	0	0	0	-0.5	0	0	-1	0.5	0
										Governing equations
	W-F FDM approximation
		17-point grid
	n =	16
		0.0625
		0.0312		Er = E0 =	200	Gpa
	kRIr =	0.01		E1 =	70	Gpa
				rr = r0 =	5700	kg/m3
		0.1252		r1 =	2702	kg/m3
		4.97527				Determinant =	-1.65857e+11
					PSM	Shahba et al.	9 pt	17 pt
		0.000377706		0.0966927	5.0170	5.0178	4.8744	4.97527
		0.2
			Nodes	1		2		3		4		5		6		7		8		9		10		11		12		13		14		15		16		17
				0		0.0625		0.125		0.1875		0.25		0.3125		0.375		0.4375		0.5		0.5625		0.625		0.6875		0.75		0.8125		0.875		0.9375		1
				1		0.95093		0.903688		0.858229		0.814506		0.772476		0.732094		0.693316		0.6561		0.620402		0.586182		0.553397		0.522006		0.491971		0.46325		0.435806		0.4096
				1		0.975156		0.950625		0.926406		0.9025		0.878906		0.855625		0.832656		0.81		0.787656		0.765625		0.743906		0.7225		0.701406		0.680625		0.660156		0.64
				1		0.997945		0.991782		0.981509		0.967127		0.948636		0.926036		0.899327		0.868509		0.833581		0.794545		0.751399		0.704145		0.652781		0.597308		0.537726		0.474035
				1		0.997461		0.989844		0.977148		0.959375		0.936523		0.908594		0.875586		0.8375		0.794336		0.746094		0.692773		0.634375		0.570898		0.502344		0.428711		0.35
				-0.025		-0.0295768		-0.0337822		-0.0376259		-0.0411172		-0.0442657		-0.0470811		-0.0495726		-0.05175		-0.0536227		-0.0552002		-0.0564921		-0.0575078		-0.058257		-0.058749		-0.0589935		-0.059
				-0.05		-0.052855		-0.0550504		-0.0566391		-0.0576719		-0.0581972		-0.0582615		-0.0579087		-0.0571809		-0.0561182		-0.0547583		-0.0531372		-0.051289		-0.0492458		-0.0470379		-0.0446937		-0.04224
		W0	hkF0	W1	hkF1	W2	hkF2	W3	hkF3	W4	hkF4	W5	hkF5	W6	hkF6	W7	hkF7	W8	hkF8	W9	hkF9	W10	hkF10	W11	hkF11	W12	hkF12	W13	hkF13	W14	hkF14	W15	hkF15	W16	hkF16	W17	hkF17	W18	hkF18
	Gov Eq 1 (1)	0.126765	0.0626002	-0.250023	0.00313001	0.123635	-0.0626002	0	0	0	0	0	0	0	0	0	0	0	0	0	0	0	0	0	0	0	0	0	0	0	0	0	0	0	0	0	0	0	0
	Gov Eq 2 (1)	-0.0626002	1.025	0	-2.12423	0.0626002	0.975	0	0	0	0	0	0	0	0	0	0	0	0	0	0	0	0	0	0	0	0	0	0	0	0	0	0	0	0	0	0	0	0
	Gov Eq 1 (2)	0	0	0.123631	0.0608899	-0.243192	0.00370302	0.119928	-0.0608899	0	0	0	0	0	0	0	0	0	0	0	0	0	0	0	0	0	0	0	0	0	0	0	0	0	0	0	0	0	0
	Gov Eq 2 (2)	0	0	-0.0608899	0.974943	0	-2.01789	0.0608899	0.922088	0	0	0	0	0	0	0	0	0	0	0	0	0	0	0	0	0	0	0	0	0	0	0	0	0	0	0	0	0	0
	Gov Eq 1 (3)	0	0	0	0	0.119925	0.0589049	-0.235263	0.00422955	0.115695	-0.0589049	0	0	0	0	0	0	0	0	0	0	0	0	0	0	0	0	0	0	0	0	0	0	0	0	0	0	0	0
	Gov Eq 2 (3)	0	0	0	0	-0.0589049	0.922035	0	-1.90596	0.0589049	0.866985	0	0	0	0	0	0	0	0	0	0	0	0	0	0	0	0	0	0	0	0	0	0	0	0	0	0	0	0
	Gov Eq 1 (4)	0	0	0	0	0	0	0.115691	0.0566679	-0.226328	0.00471077	0.110981	-0.0566679	0	0	0	0	0	0	0	0	0	0	0	0	0	0	0	0	0	0	0	0	0	0	0	0	0	0
	Gov Eq 2 (4)	0	0	0	0	0	0	-0.0566679	0.866936	0	-1.78975	0.0566679	0.810297	0	0	0	0	0	0	0	0	0	0	0	0	0	0	0	0	0	0	0	0	0	0	0	0	0	0
	Gov Eq 1 (5)	0	0	0	0	0	0	0	0	0.110977	0.0542015	-0.216476	0.00514789	0.105829	-0.0542015	0	0	0	0	0	0	0	0	0	0	0	0	0	0	0	0	0	0	0	0	0	0	0	0
	Gov Eq 2 (5)	0	0	0	0	0	0	0	0	-0.0542015	0.810253	0	-1.67048	0.0542015	0.752581	0	0	0	0	0	0	0	0	0	0	0	0	0	0	0	0	0	0	0	0	0	0	0	0
	Gov Eq 1 (6)	0	0	0	0	0	0	0	0	0	0	0.105825	0.0515272	-0.205794	0.00554209	0.100283	-0.0515272	0	0	0	0	0	0	0	0	0	0	0	0	0	0	0	0	0	0	0	0	0	0
	Gov Eq 2 (6)	0	0	0	0	0	0	0	0	0	0	-0.0515272	0.752541	0	-1.54923	0.0515272	0.694343	0	0	0	0	0	0	0	0	0	0	0	0	0	0	0	0	0	0	0	0	0	0
	Gov Eq 1 (7)	0	0	0	0	0	0	0	0	0	0	0	0	0.10028	0.0486663	-0.194366	0.00589456	0.0943854	-0.0486663	0	0	0	0	0	0	0	0	0	0	0	0	0	0	0	0	0	0	0	0
	Gov Eq 2 (7)	0	0	0	0	0	0	0	0	0	0	0	0	-0.0486663	0.694307	0	-1.42703	0.0486663	0.636045	0	0	0	0	0	0	0	0	0	0	0	0	0	0	0	0	0	0	0	0
	Gov Eq 1 (8)	0	0	0	0	0	0	0	0	0	0	0	0	0	0	0.0943821	0.0456394	-0.182275	0.00620651	0.0881756	-0.0456394	0	0	0	0	0	0	0	0	0	0	0	0	0	0	0	0	0	0
	Gov Eq 2 (8)	0	0	0	0	0	0	0	0	0	0	0	0	0	0	-0.0456394	0.636012	0	-1.30479	0.0456394	0.578104	0	0	0	0	0	0	0	0	0	0	0	0	0	0	0	0	0	0
	Gov Eq 1 (9)	0	0	0	0	0	0	0	0	0	0	0	0	0	0	0	0	0.0881723	0.0424664	-0.1696	0.00647912	0.0816932	-0.0424664	0	0	0	0	0	0	0	0	0	0	0	0	0	0	0	0
	Gov Eq 2 (9)	0	0	0	0	0	0	0	0	0	0	0	0	0	0	0	0	-0.0424664	0.578074	0	-1.18335	0.0424664	0.520893	0	0	0	0	0	0	0	0	0	0	0	0	0	0	0	0
	Gov Eq 1 (10)	0	0	0	0	0	0	0	0	0	0	0	0	0	0	0	0	0	0	0.0816901	0.0391666	-0.156419	0.00671358	0.0749765	-0.0391666	0	0	0	0	0	0	0	0	0	0	0	0	0	0
	Gov Eq 2 (10)	0	0	0	0	0	0	0	0	0	0	0	0	0	0	0	0	0	0	-0.0391666	0.520867	0	-1.06345	0.0391666	0.464749	0	0	0	0	0	0	0	0	0	0	0	0	0	0
	Gov Eq 1 (11)	0	0	0	0	0	0	0	0	0	0	0	0	0	0	0	0	0	0	0	0	0.0749735	0.035759	-0.142806	0.00691108	0.0680624	-0.035759	0	0	0	0	0	0	0	0	0	0	0	0
	Gov Eq 2 (11)	0	0	0	0	0	0	0	0	0	0	0	0	0	0	0	0	0	0	0	0	-0.035759	0.464726	0	-0.945761	0.035759	0.409967	0	0	0	0	0	0	0	0	0	0	0	0
	Gov Eq 1 (12)	0	0	0	0	0	0	0	0	0	0	0	0	0	0	0	0	0	0	0	0	0	0	0.0680595	0.0322615	-0.128835	0.00707282	0.0609866	-0.0322615	0	0	0	0	0	0	0	0	0	0
	Gov Eq 2 (12)	0	0	0	0	0	0	0	0	0	0	0	0	0	0	0	0	0	0	0	0	0	0	-0.0322615	0.409947	0	-0.830878	0.0322615	0.35681	0	0	0	0	0	0	0	0	0	0
	Gov Eq 1 (13)	0	0	0	0	0	0	0	0	0	0	0	0	0	0	0	0	0	0	0	0	0	0	0	0	0.0609838	0.0286919	-0.114575	0.0072	0.0537838	-0.0286919	0	0	0	0	0	0	0	0
	Gov Eq 2 (13)	0	0	0	0	0	0	0	0	0	0	0	0	0	0	0	0	0	0	0	0	0	0	0	0	-0.0286919	0.356792	0	-0.719324	0.0286919	0.305503	0	0	0	0	0	0	0	0
	Gov Eq 1 (14)	0	0	0	0	0	0	0	0	0	0	0	0	0	0	0	0	0	0	0	0	0	0	0	0	0	0	0.0537811	0.0250671	-0.100095	0.00729379	0.0464873	-0.0250671	0	0	0	0	0	0
	Gov Eq 2 (14)	0	0	0	0	0	0	0	0	0	0	0	0	0	0	0	0	0	0	0	0	0	0	0	0	0	0	-0.0250671	0.305488	0	-0.611554	0.0250671	0.256242	0	0	0	0	0	0
	Gov Eq 1 (15)	0	0	0	0	0	0	0	0	0	0	0	0	0	0	0	0	0	0	0	0	0	0	0	0	0	0	0	0	0.0464847	0.0214035	-0.0854604	0.0073554	0.0391293	-0.0214035	0	0	0	0
	Gov Eq 2 (15)	0	0	0	0	0	0	0	0	0	0	0	0	0	0	0	0	0	0	0	0	0	0	0	0	0	0	0	0	-0.0214035	0.25623	0	-0.507961	0.0214035	0.209192	0	0	0	0
	Gov Eq 1 (16)	0	0	0	0	0	0	0	0	0	0	0	0	0	0	0	0	0	0	0	0	0	0	0	0	0	0	0	0	0	0	0.0391267	0.0177169	-0.0707334	0.00738601	0.0317407	-0.0177169	0	0
	Gov Eq 2 (16)	0	0	0	0	0	0	0	0	0	0	0	0	0	0	0	0	0	0	0	0	0	0	0	0	0	0	0	0	0	0	-0.0177169	0.209182	0	-0.408877	0.0177169	0.164488	0	0
	Gov Eq 1 (17)	0	0	0	0	0	0	0	0	0	0	0	0	0	0	0	0	0	0	0	0	0	0	0	0	0	0	0	0	0	0	0	0	0.0317383	0.0140224	-0.0559752	0.00738682	0.0243515	-0.0140224
	Gov Eq 2 (17)	0	0	0	0	0	0	0	0	0	0	0	0	0	0	0	0	0	0	0	0	0	0	0	0	0	0	0	0	0	0	0	0	-0.0140224	0.16448	0	-0.314577	0.0140224	0.12224
	Bo Co 1 (1)	0	0	1	0	0	0	0	0	0	0	0	0	0	0	0	0	0	0	0	0	0	0	0	0	0	0	0	0	0	0	0	0	0	0	0	0	0	0
	Bo Co 2 (1)	0	0	0	1	0	0	0	0	0	0	0	0	0	0	0	0	0	0	0	0	0	0	0	0	0	0	0	0	0	0	0	0	0	0	0	0	0	0
	Bo Co 1 (17)	0	0	0	0	0	0	0	0	0	0	0	0	0	0	0	0	0	0	0	0	0	0	0	0	0	0	0	0	0	0	0	0	0	1	0	0	0	-1
	Bo Co 2 (17)	0	0	0	0	0	0	0	0	0	0	0	0	0	0	0	0	0	0	0	0	0	0	0	0	0	0	0	0	0	0	0	0	-0.5	0	0	-1	0.5	0
										Governing equations
	W-F FDM approximation
		33-point grid
	n =	32
		0.03125
		0.0312		Er = E0 =	200	Gpa
	kRIr =	0.01		E1 =	70	Gpa
				rr = r0 =	5700	kg/m3
		0.0313001		r1 =	2702	kg/m3
		5.00574				Determinant =	-3.01913e+18
					PSM	Shahba et al.	9 pt	17 pt	33 pt
		2.38967e-05		0.0244702	5.0170	5.0178	4.8744	4.97527	5.00574
		0.2
			Nodes	1		2		3		4		5		6		7		8		9		10		11		12		13		14		15		16		17		18		19		20		21		22		23
				0		0.03125		0.0625		0.09375		0.125		0.15625		0.1875		0.21875		0.25		0.28125		0.3125		0.34375		0.375		0.40625		0.4375		0.46875		0.5		0.53125		0.5625		0.59375		0.625		0.65625		0.6875
				1		0.975233		0.95093		0.927083		0.903688		0.880738		0.858229		0.836153		0.814506		0.793282		0.772476		0.752082		0.732094		0.712507		0.693316		0.674516		0.6561		0.638064		0.620402		0.60311		0.586182		0.569612		0.553397
				1		0.987539		0.975156		0.962852		0.950625		0.938477		0.926406		0.914414		0.9025		0.890664		0.878906		0.867227		0.855625		0.844102		0.832656		0.821289		0.81		0.798789		0.787656		0.776602		0.765625		0.754727		0.743906
				1		0.999486		0.997945		0.995377		0.991782		0.987159		0.981509		0.974832		0.967127		0.958395		0.948636		0.93785		0.926036		0.913195		0.899327		0.884432		0.868509		0.851559		0.833581		0.814577		0.794545		0.773486		0.751399
				1		0.999365		0.997461		0.994287		0.989844		0.984131		0.977148		0.968896		0.959375		0.948584		0.936523		0.923193		0.908594		0.892725		0.875586		0.857178		0.8375		0.816553		0.794336		0.77085		0.746094		0.720068		0.692773
				-0.0125		-0.0136677		-0.0147884		-0.0158627		-0.0168911		-0.0178743		-0.0188129		-0.0197075		-0.0205586		-0.0213669		-0.0221329		-0.0228572		-0.0235405		-0.0241834		-0.0247863		-0.02535		-0.025875		-0.0263619		-0.0268113		-0.0272239		-0.0276001		-0.0279406		-0.028246
				-0.025		-0.0257567		-0.0264275		-0.0270159		-0.0275252		-0.0279587		-0.0283195		-0.0286109		-0.0288359		-0.0289975		-0.0290986		-0.0291421		-0.0291307		-0.0290673		-0.0289543		-0.0287946		-0.0285905		-0.0283445		-0.0280591		-0.0277365		-0.0273791		-0.0269891		-0.0265686
		W0	hkF0	W1	hkF1	W2	hkF2	W3	hkF3	W4	hkF4	W5	hkF5	W6	hkF6	W7	hkF7	W8	hkF8	W9	hkF9	W10	hkF10	W11	hkF11	W12	hkF12	W13	hkF13	W14	hkF14	W15	hkF15	W16	hkF16	W17	hkF17	W18	hkF18	W19	hkF19	W20	hkF20	W21	hkF21	W22	hkF22	W23	hkF23
	Gov Eq 1 (1)	0.0314957	0.01565	-0.0625763	0.000391251	0.0311045	-0.01565	0	0	0	0	0	0	0	0	0	0	0	0	0	0	0	0	0	0	0	0	0	0	0	0	0	0	0	0	0	0	0	0	0	0	0	0	0	0	0	0	0	0
	Gov Eq 2 (1)	-0.01565	1.0125	0	-2.03106	0.01565	0.9875	0	0	0	0	0	0	0	0	0	0	0	0	0	0	0	0	0	0	0	0	0	0	0	0	0	0	0	0	0	0	0	0	0	0	0	0	0	0	0	0	0	0
	Gov Eq 1 (2)	0	0	0.0311043	0.0154452	-0.0617573	0.0004278	0.0306765	-0.0154452	0	0	0	0	0	0	0	0	0	0	0	0	0	0	0	0	0	0	0	0	0	0	0	0	0	0	0	0	0	0	0	0	0	0	0	0	0	0	0	0
	Gov Eq 2 (2)	0	0	-0.0154452	0.987493	0	-1.97988	0.0154452	0.961736	0	0	0	0	0	0	0	0	0	0	0	0	0	0	0	0	0	0	0	0	0	0	0	0	0	0	0	0	0	0	0	0	0	0	0	0	0	0	0	0
	Gov Eq 1 (3)	0	0	0	0	0.0306764	0.0152225	-0.0608667	0.000462878	0.0302135	-0.0152225	0	0	0	0	0	0	0	0	0	0	0	0	0	0	0	0	0	0	0	0	0	0	0	0	0	0	0	0	0	0	0	0	0	0	0	0	0	0
	Gov Eq 2 (3)	0	0	0	0	-0.0152225	0.961729	0	-1.92724	0.0152225	0.935301	0	0	0	0	0	0	0	0	0	0	0	0	0	0	0	0	0	0	0	0	0	0	0	0	0	0	0	0	0	0	0	0	0	0	0	0	0	0
	Gov Eq 1 (4)	0	0	0	0	0	0	0.0302134	0.0149826	-0.0599074	0.000496503	0.0297169	-0.0149826	0	0	0	0	0	0	0	0	0	0	0	0	0	0	0	0	0	0	0	0	0	0	0	0	0	0	0	0	0	0	0	0	0	0	0	0
	Gov Eq 2 (4)	0	0	0	0	0	0	-0.0149826	0.935295	0	-1.87331	0.0149826	0.908279	0	0	0	0	0	0	0	0	0	0	0	0	0	0	0	0	0	0	0	0	0	0	0	0	0	0	0	0	0	0	0	0	0	0	0	0
	Gov Eq 1 (5)	0	0	0	0	0	0	0	0	0.0297168	0.0147262	-0.0588824	0.000528693	0.0291881	-0.0147262	0	0	0	0	0	0	0	0	0	0	0	0	0	0	0	0	0	0	0	0	0	0	0	0	0	0	0	0	0	0	0	0	0	0
	Gov Eq 2 (5)	0	0	0	0	0	0	0	0	-0.0147262	0.908272	0	-1.81825	0.0147262	0.880747	0	0	0	0	0	0	0	0	0	0	0	0	0	0	0	0	0	0	0	0	0	0	0	0	0	0	0	0	0	0	0	0	0	0
	Gov Eq 1 (6)	0	0	0	0	0	0	0	0	0	0	0.029188	0.0144541	-0.0577944	0.000559468	0.0286285	-0.0144541	0	0	0	0	0	0	0	0	0	0	0	0	0	0	0	0	0	0	0	0	0	0	0	0	0	0	0	0	0	0	0	0
	Gov Eq 2 (6)	0	0	0	0	0	0	0	0	0	0	-0.0144541	0.880741	0	-1.76222	0.0144541	0.852782	0	0	0	0	0	0	0	0	0	0	0	0	0	0	0	0	0	0	0	0	0	0	0	0	0	0	0	0	0	0	0	0
	Gov Eq 1 (7)	0	0	0	0	0	0	0	0	0	0	0	0	0.0286284	0.014167	-0.0566462	0.000588846	0.0280395	-0.014167	0	0	0	0	0	0	0	0	0	0	0	0	0	0	0	0	0	0	0	0	0	0	0	0	0	0	0	0	0	0
	Gov Eq 2 (7)	0	0	0	0	0	0	0	0	0	0	0	0	-0.014167	0.852776	0	-1.70536	0.014167	0.824457	0	0	0	0	0	0	0	0	0	0	0	0	0	0	0	0	0	0	0	0	0	0	0	0	0	0	0	0	0	0
	Gov Eq 1 (8)	0	0	0	0	0	0	0	0	0	0	0	0	0	0	0.0280394	0.0138655	-0.0554407	0.000616846	0.0274226	-0.0138655	0	0	0	0	0	0	0	0	0	0	0	0	0	0	0	0	0	0	0	0	0	0	0	0	0	0	0	0
	Gov Eq 2 (8)	0	0	0	0	0	0	0	0	0	0	0	0	0	0	-0.0138655	0.824451	0	-1.64782	0.0138655	0.79584	0	0	0	0	0	0	0	0	0	0	0	0	0	0	0	0	0	0	0	0	0	0	0	0	0	0	0	0
	Gov Eq 1 (9)	0	0	0	0	0	0	0	0	0	0	0	0	0	0	0	0	0.0274225	0.0135504	-0.0541806	0.000643486	0.026779	-0.0135504	0	0	0	0	0	0	0	0	0	0	0	0	0	0	0	0	0	0	0	0	0	0	0	0	0	0
	Gov Eq 2 (9)	0	0	0	0	0	0	0	0	0	0	0	0	0	0	0	0	-0.0135504	0.795835	0	-1.58974	0.0135504	0.766999	0	0	0	0	0	0	0	0	0	0	0	0	0	0	0	0	0	0	0	0	0	0	0	0	0	0
	Gov Eq 1 (10)	0	0	0	0	0	0	0	0	0	0	0	0	0	0	0	0	0	0	0.0267789	0.0132222	-0.0528686	0.000668784	0.0261101	-0.0132222	0	0	0	0	0	0	0	0	0	0	0	0	0	0	0	0	0	0	0	0	0	0	0	0
	Gov Eq 2 (10)	0	0	0	0	0	0	0	0	0	0	0	0	0	0	0	0	0	0	-0.0132222	0.766994	0	-1.53125	0.0132222	0.737996	0	0	0	0	0	0	0	0	0	0	0	0	0	0	0	0	0	0	0	0	0	0	0	0
	Gov Eq 1 (11)	0	0	0	0	0	0	0	0	0	0	0	0	0	0	0	0	0	0	0	0	0.02611	0.0128818	-0.0515073	0.000692761	0.0254172	-0.0128818	0	0	0	0	0	0	0	0	0	0	0	0	0	0	0	0	0	0	0	0	0	0
	Gov Eq 2 (11)	0	0	0	0	0	0	0	0	0	0	0	0	0	0	0	0	0	0	0	0	-0.0128818	0.737991	0	-1.47247	0.0128818	0.708893	0	0	0	0	0	0	0	0	0	0	0	0	0	0	0	0	0	0	0	0	0	0
	Gov Eq 1 (12)	0	0	0	0	0	0	0	0	0	0	0	0	0	0	0	0	0	0	0	0	0	0	0.0254171	0.0125297	-0.0500994	0.000715433	0.0247017	-0.0125297	0	0	0	0	0	0	0	0	0	0	0	0	0	0	0	0	0	0	0	0
	Gov Eq 2 (12)	0	0	0	0	0	0	0	0	0	0	0	0	0	0	0	0	0	0	0	0	0	0	-0.0125297	0.708888	0	-1.41352	0.0125297	0.679746	0	0	0	0	0	0	0	0	0	0	0	0	0	0	0	0	0	0	0	0
	Gov Eq 1 (13)	0	0	0	0	0	0	0	0	0	0	0	0	0	0	0	0	0	0	0	0	0	0	0	0	0.0247016	0.0121666	-0.0486474	0.00073682	0.0239648	-0.0121666	0	0	0	0	0	0	0	0	0	0	0	0	0	0	0	0	0	0
	Gov Eq 2 (13)	0	0	0	0	0	0	0	0	0	0	0	0	0	0	0	0	0	0	0	0	0	0	0	0	-0.0121666	0.679742	0	-1.35452	0.0121666	0.650611	0	0	0	0	0	0	0	0	0	0	0	0	0	0	0	0	0	0
	Gov Eq 1 (14)	0	0	0	0	0	0	0	0	0	0	0	0	0	0	0	0	0	0	0	0	0	0	0	0	0	0	0.0239647	0.0117931	-0.0471539	0.000756941	0.0232077	-0.0117931	0	0	0	0	0	0	0	0	0	0	0	0	0	0	0	0
	Gov Eq 2 (14)	0	0	0	0	0	0	0	0	0	0	0	0	0	0	0	0	0	0	0	0	0	0	0	0	0	0	-0.0117931	0.650607	0	-1.29557	0.0117931	0.621539	0	0	0	0	0	0	0	0	0	0	0	0	0	0	0	0
	Gov Eq 1 (15)	0	0	0	0	0	0	0	0	0	0	0	0	0	0	0	0	0	0	0	0	0	0	0	0	0	0	0	0	0.0232076	0.0114099	-0.0456215	0.000775814	0.0224318	-0.0114099	0	0	0	0	0	0	0	0	0	0	0	0	0	0
	Gov Eq 2 (15)	0	0	0	0	0	0	0	0	0	0	0	0	0	0	0	0	0	0	0	0	0	0	0	0	0	0	0	0	-0.0114099	0.621535	0	-1.23678	0.0114099	0.592581	0	0	0	0	0	0	0	0	0	0	0	0	0	0
	Gov Eq 1 (16)	0	0	0	0	0	0	0	0	0	0	0	0	0	0	0	0	0	0	0	0	0	0	0	0	0	0	0	0	0	0	0.0224317	0.0110175	-0.0440526	0.000793457	0.0216382	-0.0110175	0	0	0	0	0	0	0	0	0	0	0	0
	Gov Eq 2 (16)	0	0	0	0	0	0	0	0	0	0	0	0	0	0	0	0	0	0	0	0	0	0	0	0	0	0	0	0	0	0	-0.0110175	0.592577	0	-1.17825	0.0110175	0.563783	0	0	0	0	0	0	0	0	0	0	0	0
	Gov Eq 1 (17)	0	0	0	0	0	0	0	0	0	0	0	0	0	0	0	0	0	0	0	0	0	0	0	0	0	0	0	0	0	0	0	0	0.0216381	0.0106166	-0.0424496	0.00080989	0.0208282	-0.0106166	0	0	0	0	0	0	0	0	0	0
	Gov Eq 2 (17)	0	0	0	0	0	0	0	0	0	0	0	0	0	0	0	0	0	0	0	0	0	0	0	0	0	0	0	0	0	0	0	0	-0.0106166	0.563779	0	-1.12006	0.0106166	0.535189	0	0	0	0	0	0	0	0	0	0
	Gov Eq 1 (18)	0	0	0	0	0	0	0	0	0	0	0	0	0	0	0	0	0	0	0	0	0	0	0	0	0	0	0	0	0	0	0	0	0	0	0.0208281	0.0102078	-0.0408149	0.00082513	0.020003	-0.0102078	0	0	0	0	0	0	0	0
	Gov Eq 2 (18)	0	0	0	0	0	0	0	0	0	0	0	0	0	0	0	0	0	0	0	0	0	0	0	0	0	0	0	0	0	0	0	0	0	0	-0.0102078	0.535185	0	-1.06231	0.0102078	0.506841	0	0	0	0	0	0	0	0
	Gov Eq 1 (19)	0	0	0	0	0	0	0	0	0	0	0	0	0	0	0	0	0	0	0	0	0	0	0	0	0	0	0	0	0	0	0	0	0	0	0	0	0.0200029	0.00979166	-0.039151	0.000839197	0.0191637	-0.00979166	0	0	0	0	0	0
	Gov Eq 2 (19)	0	0	0	0	0	0	0	0	0	0	0	0	0	0	0	0	0	0	0	0	0	0	0	0	0	0	0	0	0	0	0	0	0	0	0	0	-0.00979166	0.506837	0	-1.00507	0.00979166	0.478778	0	0	0	0	0	0
	Gov Eq 1 (20)	0	0	0	0	0	0	0	0	0	0	0	0	0	0	0	0	0	0	0	0	0	0	0	0	0	0	0	0	0	0	0	0	0	0	0	0	0	0	0.0191636	0.00936879	-0.03746	0.000852109	0.0183115	-0.00936879	0	0	0	0
	Gov Eq 2 (20)	0	0	0	0	0	0	0	0	0	0	0	0	0	0	0	0	0	0	0	0	0	0	0	0	0	0	0	0	0	0	0	0	0	0	0	0	0	0	-0.00936879	0.478775	0	-0.948432	0.00936879	0.451039	0	0	0	0
	Gov Eq 1 (21)	0	0	0	0	0	0	0	0	0	0	0	0	0	0	0	0	0	0	0	0	0	0	0	0	0	0	0	0	0	0	0	0	0	0	0	0	0	0	0	0	0.0183114	0.00893974	-0.0357444	0.000863885	0.0174475	-0.00893974	0	0
	Gov Eq 2 (21)	0	0	0	0	0	0	0	0	0	0	0	0	0	0	0	0	0	0	0	0	0	0	0	0	0	0	0	0	0	0	0	0	0	0	0	0	0	0	0	0	-0.00893974	0.451036	0	-0.892458	0.00893974	0.423657	0	0
	Gov Eq 1 (22)	0	0	0	0	0	0	0	0	0	0	0	0	0	0	0	0	0	0	0	0	0	0	0	0	0	0	0	0	0	0	0	0	0	0	0	0	0	0	0	0	0	0	0.0174474	0.00850509	-0.0340064	0.000874544	0.0165729	-0.00850509
	Gov Eq 2 (22)	0	0	0	0	0	0	0	0	0	0	0	0	0	0	0	0	0	0	0	0	0	0	0	0	0	0	0	0	0	0	0	0	0	0	0	0	0	0	0	0	0	0	-0.00850509	0.423654	0	-0.837222	0.00850509	0.396665
	Gov Eq 1 (23)	0	0	0	0	0	0	0	0	0	0	0	0	0	0	0	0	0	0	0	0	0	0	0	0	0	0	0	0	0	0	0	0	0	0	0	0	0	0	0	0	0	0	0	0	0.0165728	0.00806538	-0.0322482	0.000884103
	Gov Eq 2 (23)	0	0	0	0	0	0	0	0	0	0	0	0	0	0	0	0	0	0	0	0	0	0	0	0	0	0	0	0	0	0	0	0	0	0	0	0	0	0	0	0	0	0	0	0	-0.00806538	0.396663	0	-0.782786
	Gov Eq 1 (24)	0	0	0	0	0	0	0	0	0	0	0	0	0	0	0	0	0	0	0	0	0	0	0	0	0	0	0	0	0	0	0	0	0	0	0	0	0	0	0	0	0	0	0	0	0	0	0.0156886	0.00762117
	Gov Eq 2 (24)	0	0	0	0	0	0	0	0	0	0	0	0	0	0	0	0	0	0	0	0	0	0	0	0	0	0	0	0	0	0	0	0	0	0	0	0	0	0	0	0	0	0	0	0	0	0	-0.00762117	0.370092
	Gov Eq 1 (25)	0	0	0	0	0	0	0	0	0	0	0	0	0	0	0	0	0	0	0	0	0	0	0	0	0	0	0	0	0	0	0	0	0	0	0	0	0	0	0	0	0	0	0	0	0	0	0	0
	Gov Eq 2 (25)	0	0	0	0	0	0	0	0	0	0	0	0	0	0	0	0	0	0	0	0	0	0	0	0	0	0	0	0	0	0	0	0	0	0	0	0	0	0	0	0	0	0	0	0	0	0	0	0
	Gov Eq 1 (26)	0	0	0	0	0	0	0	0	0	0	0	0	0	0	0	0	0	0	0	0	0	0	0	0	0	0	0	0	0	0	0	0	0	0	0	0	0	0	0	0	0	0	0	0	0	0	0	0
	Gov Eq 2 (26)	0	0	0	0	0	0	0	0	0	0	0	0	0	0	0	0	0	0	0	0	0	0	0	0	0	0	0	0	0	0	0	0	0	0	0	0	0	0	0	0	0	0	0	0	0	0	0	0
	Gov Eq 1 (27)	0	0	0	0	0	0	0	0	0	0	0	0	0	0	0	0	0	0	0	0	0	0	0	0	0	0	0	0	0	0	0	0	0	0	0	0	0	0	0	0	0	0	0	0	0	0	0	0
	Gov Eq 2 (27)	0	0	0	0	0	0	0	0	0	0	0	0	0	0	0	0	0	0	0	0	0	0	0	0	0	0	0	0	0	0	0	0	0	0	0	0	0	0	0	0	0	0	0	0	0	0	0	0
	Gov Eq 1 (28)	0	0	0	0	0	0	0	0	0	0	0	0	0	0	0	0	0	0	0	0	0	0	0	0	0	0	0	0	0	0	0	0	0	0	0	0	0	0	0	0	0	0	0	0	0	0	0	0
	Gov Eq 2 (28)	0	0	0	0	0	0	0	0	0	0	0	0	0	0	0	0	0	0	0	0	0	0	0	0	0	0	0	0	0	0	0	0	0	0	0	0	0	0	0	0	0	0	0	0	0	0	0	0
	Gov Eq 1 (29)	0	0	0	0	0	0	0	0	0	0	0	0	0	0	0	0	0	0	0	0	0	0	0	0	0	0	0	0	0	0	0	0	0	0	0	0	0	0	0	0	0	0	0	0	0	0	0	0
	Gov Eq 2 (29)	0	0	0	0	0	0	0	0	0	0	0	0	0	0	0	0	0	0	0	0	0	0	0	0	0	0	0	0	0	0	0	0	0	0	0	0	0	0	0	0	0	0	0	0	0	0	0	0
	Gov Eq 1 (30)	0	0	0	0	0	0	0	0	0	0	0	0	0	0	0	0	0	0	0	0	0	0	0	0	0	0	0	0	0	0	0	0	0	0	0	0	0	0	0	0	0	0	0	0	0	0	0	0
	Gov Eq 2 (30)	0	0	0	0	0	0	0	0	0	0	0	0	0	0	0	0	0	0	0	0	0	0	0	0	0	0	0	0	0	0	0	0	0	0	0	0	0	0	0	0	0	0	0	0	0	0	0	0
	Gov Eq 1 (31)	0	0	0	0	0	0	0	0	0	0	0	0	0	0	0	0	0	0	0	0	0	0	0	0	0	0	0	0	0	0	0	0	0	0	0	0	0	0	0	0	0	0	0	0	0	0	0	0
	Gov Eq 2 (31)	0	0	0	0	0	0	0	0	0	0	0	0	0	0	0	0	0	0	0	0	0	0	0	0	0	0	0	0	0	0	0	0	0	0	0	0	0	0	0	0	0	0	0	0	0	0	0	0
	Gov Eq 1 (32)	0	0	0	0	0	0	0	0	0	0	0	0	0	0	0	0	0	0	0	0	0	0	0	0	0	0	0	0	0	0	0	0	0	0	0	0	0	0	0	0	0	0	0	0	0	0	0	0
	Gov Eq 2 (32)	0	0	0	0	0	0	0	0	0	0	0	0	0	0	0	0	0	0	0	0	0	0	0	0	0	0	0	0	0	0	0	0	0	0	0	0	0	0	0	0	0	0	0	0	0	0	0	0
	Gov Eq 1 (33)	0	0	0	0	0	0	0	0	0	0	0	0	0	0	0	0	0	0	0	0	0	0	0	0	0	0	0	0	0	0	0	0	0	0	0	0	0	0	0	0	0	0	0	0	0	0	0	0
	Gov Eq 2 (33)	0	0	0	0	0	0	0	0	0	0	0	0	0	0	0	0	0	0	0	0	0	0	0	0	0	0	0	0	0	0	0	0	0	0	0	0	0	0	0	0	0	0	0	0	0	0	0	0
	Bo Co 1 (1)	0	0	1	0	0	0	0	0	0	0	0	0	0	0	0	0	0	0	0	0	0	0	0	0	0	0	0	0	0	0	0	0	0	0	0	0	0	0	0	0	0	0	0	0	0	0	0	0
	Bo Co 2 (1)	0	0	0	1	0	0	0	0	0	0	0	0	0	0	0	0	0	0	0	0	0	0	0	0	0	0	0	0	0	0	0	0	0	0	0	0	0	0	0	0	0	0	0	0	0	0	0	0
	Bo Co 1 (33)	0	0	0	0	0	0	0	0	0	0	0	0	0	0	0	0	0	0	0	0	0	0	0	0	0	0	0	0	0	0	0	0	0	0	0	0	0	0	0	0	0	0	0	0	0	0	0	0
	Bo Co 2 (33)	0	0	0	0	0	0	0	0	0	0	0	0	0	0	0	0	0	0	0	0	0	0	0	0	0	0	0	0	0	0	0	0	0	0	0	0	0	0	0	0	0	0	0	0	0	0	0	0
										Governing equations
	W-F FDM approximation
		49-point grid
	n =	48
		0.0208333
		0.0312		Er = E0 =	200	Gpa
	kRIr =	0.01		E1 =	70	Gpa
				rr = r0 =	5700	kg/m3
		0.0139111		r1 =	2702	kg/m3
		4.23823				Determinant =	3.15266e-07
					PSM	Shahba et al.	9 pt	17 pt	33 pt	49 pt
		3.38379e-06		0.00779625	4.2390	4.2384	4.2497	4.2394	4.2384	4.23823
		0.2
			Nodes	1		2		3		4		5		6		7		8		9		10		11		12		13		14		15		16		17		18		19		20		21		22		23
				0		0.0208333		0.0416667		0.0625		0.0833333		0.104167		0.125		0.145833		0.166667		0.1875		0.208333		0.229167		0.25		0.270833		0.291667		0.3125		0.333333		0.354167		0.375		0.395833		0.416667		0.4375		0.458333
				1		0.983437		0.967081		0.95093		0.934982		0.919235		0.903688		0.888339		0.873186		0.858229		0.843464		0.82889		0.814506		0.80031		0.786301		0.772476		0.758835		0.745374		0.732094		0.718992		0.706067		0.693316		0.68074
				1		0.991684		0.983403		0.975156		0.966944		0.958767		0.950625		0.942517		0.934444		0.926406		0.918403		0.910434		0.9025		0.894601		0.886736		0.878906		0.871111		0.863351		0.855625		0.847934		0.840278		0.832656		0.825069
				1		0.999772		0.999087		0.997945		0.996347		0.994293		0.991782		0.988814		0.98539		0.981509		0.977172		0.972378		0.967127		0.96142		0.955256		0.948636		0.941559		0.934026		0.926036		0.91759		0.908687		0.899327		0.889511
				1		0.999718		0.998872		0.997461		0.995486		0.992947		0.989844		0.986176		0.981944		0.977148		0.971788		0.965864		0.959375		0.952322		0.944705		0.936523		0.927778		0.918468		0.908594		0.898155		0.887153		0.875586		0.863455
				-0.00833333		-0.00885581		-0.00936431		-0.00985893		-0.0103398		-0.010807		-0.0112607		-0.0117011		-0.0121281		-0.012542		-0.0129428		-0.0133307		-0.0137057		-0.0140681		-0.0144179		-0.0147552		-0.0150802		-0.015393		-0.0156937		-0.0159824		-0.0162592		-0.0165242		-0.0167776
				-0.0166667		-0.0170094		-0.0173264		-0.0176183		-0.0178858		-0.0181295		-0.0183501		-0.0185483		-0.0187246		-0.0188797		-0.0190142		-0.0191288		-0.019224		-0.0193003		-0.0193585		-0.0193991		-0.0194226		-0.0194295		-0.0194205		-0.019396		-0.0193567		-0.0193029		-0.0192353
		W0	hkF0	W1	hkF1	W2	hkF2	W3	hkF3	W4	hkF4	W5	hkF5	W6	hkF6	W7	hkF7	W8	hkF8	W9	hkF9	W10	hkF10	W11	hkF11	W12	hkF12	W13	hkF13	W14	hkF14	W15	hkF15	W16	hkF16	W17	hkF17	W18	hkF18	W19	hkF19	W20	hkF20	W21	hkF21	W22	hkF22	W23	hkF23
	Gov Eq 1 (1)	0.0139691	0.00695557	-0.0278189	0.000115926	0.0138532	-0.00695557	0	0	0	0	0	0	0	0	0	0	0	0	0	0	0	0	0	0	0	0	0	0	0	0	0	0	0	0	0	0	0	0	0	0	0	0	0	0	0	0	0	0
	Gov Eq 2 (1)	-0.00695557	1.00833	0	-2.01383	0.00695557	0.991667	0	0	0	0	0	0	0	0	0	0	0	0	0	0	0	0	0	0	0	0	0	0	0	0	0	0	0	0	0	0	0	0	0	0	0	0	0	0	0	0	0	0
	Gov Eq 1 (2)	0	0	0.0138532	0.00689579	-0.0275798	0.000123195	0.01373	-0.00689579	0	0	0	0	0	0	0	0	0	0	0	0	0	0	0	0	0	0	0	0	0	0	0	0	0	0	0	0	0	0	0	0	0	0	0	0	0	0	0	0
	Gov Eq 2 (2)	0	0	-0.00689579	0.991664	0	-1.98003	0.00689579	0.974655	0	0	0	0	0	0	0	0	0	0	0	0	0	0	0	0	0	0	0	0	0	0	0	0	0	0	0	0	0	0	0	0	0	0	0	0	0	0	0	0
	Gov Eq 1 (3)	0	0	0	0	0.01373	0.00683241	-0.0273263	0.000130268	0.0135997	-0.00683241	0	0	0	0	0	0	0	0	0	0	0	0	0	0	0	0	0	0	0	0	0	0	0	0	0	0	0	0	0	0	0	0	0	0	0	0	0	0
	Gov Eq 2 (3)	0	0	0	0	-0.00683241	0.974653	0	-1.94557	0.00683241	0.957326	0	0	0	0	0	0	0	0	0	0	0	0	0	0	0	0	0	0	0	0	0	0	0	0	0	0	0	0	0	0	0	0	0	0	0	0	0	0
	Gov Eq 1 (4)	0	0	0	0	0	0	0.0135997	0.00676555	-0.0270589	0.000137149	0.0134625	-0.00676555	0	0	0	0	0	0	0	0	0	0	0	0	0	0	0	0	0	0	0	0	0	0	0	0	0	0	0	0	0	0	0	0	0	0	0	0
	Gov Eq 2 (4)	0	0	0	0	0	0	-0.00676555	0.957324	0	-1.91049	0.00676555	0.939706	0	0	0	0	0	0	0	0	0	0	0	0	0	0	0	0	0	0	0	0	0	0	0	0	0	0	0	0	0	0	0	0	0	0	0	0
	Gov Eq 1 (5)	0	0	0	0	0	0	0	0	0.0134625	0.00669529	-0.0267779	0.000143838	0.0133187	-0.00669529	0	0	0	0	0	0	0	0	0	0	0	0	0	0	0	0	0	0	0	0	0	0	0	0	0	0	0	0	0	0	0	0	0	0
	Gov Eq 2 (5)	0	0	0	0	0	0	0	0	-0.00669529	0.939704	0	-1.87484	0.00669529	0.921818	0	0	0	0	0	0	0	0	0	0	0	0	0	0	0	0	0	0	0	0	0	0	0	0	0	0	0	0	0	0	0	0	0	0
	Gov Eq 1 (6)	0	0	0	0	0	0	0	0	0	0	0.0133187	0.00662174	-0.0264837	0.000150338	0.0131683	-0.00662174	0	0	0	0	0	0	0	0	0	0	0	0	0	0	0	0	0	0	0	0	0	0	0	0	0	0	0	0	0	0	0	0
	Gov Eq 2 (6)	0	0	0	0	0	0	0	0	0	0	-0.00662174	0.921816	0	-1.83868	0.00662174	0.903687	0	0	0	0	0	0	0	0	0	0	0	0	0	0	0	0	0	0	0	0	0	0	0	0	0	0	0	0	0	0	0	0
	Gov Eq 1 (7)	0	0	0	0	0	0	0	0	0	0	0	0	0.0131683	0.00654499	-0.0261768	0.00015665	0.0130116	-0.00654499	0	0	0	0	0	0	0	0	0	0	0	0	0	0	0	0	0	0	0	0	0	0	0	0	0	0	0	0	0	0
	Gov Eq 2 (7)	0	0	0	0	0	0	0	0	0	0	0	0	-0.00654499	0.903685	0	-1.80204	0.00654499	0.885335	0	0	0	0	0	0	0	0	0	0	0	0	0	0	0	0	0	0	0	0	0	0	0	0	0	0	0	0	0	0
	Gov Eq 1 (8)	0	0	0	0	0	0	0	0	0	0	0	0	0	0	0.0130116	0.00646512	-0.0258573	0.000162775	0.0128489	-0.00646512	0	0	0	0	0	0	0	0	0	0	0	0	0	0	0	0	0	0	0	0	0	0	0	0	0	0	0	0
	Gov Eq 2 (8)	0	0	0	0	0	0	0	0	0	0	0	0	0	0	-0.00646512	0.885333	0	-1.76498	0.00646512	0.866785	0	0	0	0	0	0	0	0	0	0	0	0	0	0	0	0	0	0	0	0	0	0	0	0	0	0	0	0
	Gov Eq 1 (9)	0	0	0	0	0	0	0	0	0	0	0	0	0	0	0	0	0.0128488	0.00638224	-0.0255259	0.000168716	0.0126801	-0.00638224	0	0	0	0	0	0	0	0	0	0	0	0	0	0	0	0	0	0	0	0	0	0	0	0	0	0
	Gov Eq 2 (9)	0	0	0	0	0	0	0	0	0	0	0	0	0	0	0	0	-0.00638224	0.866783	0	-1.72754	0.00638224	0.848058	0	0	0	0	0	0	0	0	0	0	0	0	0	0	0	0	0	0	0	0	0	0	0	0	0	0
	Gov Eq 1 (10)	0	0	0	0	0	0	0	0	0	0	0	0	0	0	0	0	0	0	0.0126801	0.00629644	-0.0251827	0.000174473	0.0125056	-0.00629644	0	0	0	0	0	0	0	0	0	0	0	0	0	0	0	0	0	0	0	0	0	0	0	0
	Gov Eq 2 (10)	0	0	0	0	0	0	0	0	0	0	0	0	0	0	0	0	0	0	-0.00629644	0.848057	0	-1.68976	0.00629644	0.829177	0	0	0	0	0	0	0	0	0	0	0	0	0	0	0	0	0	0	0	0	0	0	0	0
	Gov Eq 1 (11)	0	0	0	0	0	0	0	0	0	0	0	0	0	0	0	0	0	0	0	0	0.0125056	0.0062078	-0.0248282	0.000180049	0.0123256	-0.0062078	0	0	0	0	0	0	0	0	0	0	0	0	0	0	0	0	0	0	0	0	0	0
	Gov Eq 2 (11)	0	0	0	0	0	0	0	0	0	0	0	0	0	0	0	0	0	0	0	0	-0.0062078	0.829175	0	-1.65169	0.0062078	0.810161	0	0	0	0	0	0	0	0	0	0	0	0	0	0	0	0	0	0	0	0	0	0
	Gov Eq 1 (12)	0	0	0	0	0	0	0	0	0	0	0	0	0	0	0	0	0	0	0	0	0	0	0.0123256	0.00611642	-0.0244627	0.000185445	0.0121401	-0.00611642	0	0	0	0	0	0	0	0	0	0	0	0	0	0	0	0	0	0	0	0
	Gov Eq 2 (12)	0	0	0	0	0	0	0	0	0	0	0	0	0	0	0	0	0	0	0	0	0	0	-0.00611642	0.810159	0	-1.61336	0.00611642	0.791031	0	0	0	0	0	0	0	0	0	0	0	0	0	0	0	0	0	0	0	0
	Gov Eq 1 (13)	0	0	0	0	0	0	0	0	0	0	0	0	0	0	0	0	0	0	0	0	0	0	0	0	0.0121401	0.00602239	-0.0240866	0.000190662	0.0119494	-0.00602239	0	0	0	0	0	0	0	0	0	0	0	0	0	0	0	0	0	0
	Gov Eq 2 (13)	0	0	0	0	0	0	0	0	0	0	0	0	0	0	0	0	0	0	0	0	0	0	0	0	-0.00602239	0.791029	0	-1.57482	0.00602239	0.771805	0	0	0	0	0	0	0	0	0	0	0	0	0	0	0	0	0	0
	Gov Eq 1 (14)	0	0	0	0	0	0	0	0	0	0	0	0	0	0	0	0	0	0	0	0	0	0	0	0	0	0	0.0119494	0.00592579	-0.0237002	0.000195704	0.0117537	-0.00592579	0	0	0	0	0	0	0	0	0	0	0	0	0	0	0	0
	Gov Eq 2 (14)	0	0	0	0	0	0	0	0	0	0	0	0	0	0	0	0	0	0	0	0	0	0	0	0	0	0	-0.00592579	0.771803	0	-1.5361	0.00592579	0.752503	0	0	0	0	0	0	0	0	0	0	0	0	0	0	0	0
	Gov Eq 1 (15)	0	0	0	0	0	0	0	0	0	0	0	0	0	0	0	0	0	0	0	0	0	0	0	0	0	0	0	0	0.0117537	0.00582671	-0.023304	0.00020057	0.0115531	-0.00582671	0	0	0	0	0	0	0	0	0	0	0	0	0	0
	Gov Eq 2 (15)	0	0	0	0	0	0	0	0	0	0	0	0	0	0	0	0	0	0	0	0	0	0	0	0	0	0	0	0	-0.00582671	0.752502	0	-1.49724	0.00582671	0.733143	0	0	0	0	0	0	0	0	0	0	0	0	0	0
	Gov Eq 1 (16)	0	0	0	0	0	0	0	0	0	0	0	0	0	0	0	0	0	0	0	0	0	0	0	0	0	0	0	0	0	0	0.0115531	0.00572525	-0.0228982	0.000205262	0.0113479	-0.00572525	0	0	0	0	0	0	0	0	0	0	0	0
	Gov Eq 2 (16)	0	0	0	0	0	0	0	0	0	0	0	0	0	0	0	0	0	0	0	0	0	0	0	0	0	0	0	0	0	0	-0.00572525	0.733142	0	-1.45828	0.00572525	0.713743	0	0	0	0	0	0	0	0	0	0	0	0
	Gov Eq 1 (17)	0	0	0	0	0	0	0	0	0	0	0	0	0	0	0	0	0	0	0	0	0	0	0	0	0	0	0	0	0	0	0	0	0.0113478	0.00562148	-0.0224831	0.000209784	0.0111381	-0.00562148	0	0	0	0	0	0	0	0	0	0
	Gov Eq 2 (17)	0	0	0	0	0	0	0	0	0	0	0	0	0	0	0	0	0	0	0	0	0	0	0	0	0	0	0	0	0	0	0	0	-0.00562148	0.713741	0	-1.41925	0.00562148	0.694319	0	0	0	0	0	0	0	0	0	0
	Gov Eq 1 (18)	0	0	0	0	0	0	0	0	0	0	0	0	0	0	0	0	0	0	0	0	0	0	0	0	0	0	0	0	0	0	0	0	0	0	0.011138	0.00551549	-0.0220592	0.000214135	0.0109239	-0.00551549	0	0	0	0	0	0	0	0
	Gov Eq 2 (18)	0	0	0	0	0	0	0	0	0	0	0	0	0	0	0	0	0	0	0	0	0	0	0	0	0	0	0	0	0	0	0	0	0	0	-0.00551549	0.694317	0	-1.38018	0.00551549	0.674888	0	0	0	0	0	0	0	0
	Gov Eq 1 (19)	0	0	0	0	0	0	0	0	0	0	0	0	0	0	0	0	0	0	0	0	0	0	0	0	0	0	0	0	0	0	0	0	0	0	0	0	0.0109239	0.00540737	-0.0216268	0.000218317	0.0107056	-0.00540737	0	0	0	0	0	0
	Gov Eq 2 (19)	0	0	0	0	0	0	0	0	0	0	0	0	0	0	0	0	0	0	0	0	0	0	0	0	0	0	0	0	0	0	0	0	0	0	0	0	-0.00540737	0.674886	0	-1.34111	0.00540737	0.655466	0	0	0	0	0	0
	Gov Eq 1 (20)	0	0	0	0	0	0	0	0	0	0	0	0	0	0	0	0	0	0	0	0	0	0	0	0	0	0	0	0	0	0	0	0	0	0	0	0	0	0	0.0107056	0.0052972	-0.0211862	0.000222333	0.0104832	-0.0052972	0	0	0	0
	Gov Eq 2 (20)	0	0	0	0	0	0	0	0	0	0	0	0	0	0	0	0	0	0	0	0	0	0	0	0	0	0	0	0	0	0	0	0	0	0	0	0	0	0	-0.0052972	0.655465	0	-1.30208	0.0052972	0.636069	0	0	0	0
	Gov Eq 1 (21)	0	0	0	0	0	0	0	0	0	0	0	0	0	0	0	0	0	0	0	0	0	0	0	0	0	0	0	0	0	0	0	0	0	0	0	0	0	0	0	0	0.0104832	0.00518507	-0.0207377	0.000226184	0.010257	-0.00518507	0	0
	Gov Eq 2 (21)	0	0	0	0	0	0	0	0	0	0	0	0	0	0	0	0	0	0	0	0	0	0	0	0	0	0	0	0	0	0	0	0	0	0	0	0	0	0	0	0	-0.00518507	0.636067	0	-1.2631	0.00518507	0.616711	0	0
	Gov Eq 1 (22)	0	0	0	0	0	0	0	0	0	0	0	0	0	0	0	0	0	0	0	0	0	0	0	0	0	0	0	0	0	0	0	0	0	0	0	0	0	0	0	0	0	0	0.010257	0.00507104	-0.0202816	0.000229871	0.0100272	-0.00507104
	Gov Eq 2 (22)	0	0	0	0	0	0	0	0	0	0	0	0	0	0	0	0	0	0	0	0	0	0	0	0	0	0	0	0	0	0	0	0	0	0	0	0	0	0	0	0	0	0	-0.00507104	0.61671	0	-1.22421	0.00507104	0.597407
	Gov Eq 1 (23)	0	0	0	0	0	0	0	0	0	0	0	0	0	0	0	0	0	0	0	0	0	0	0	0	0	0	0	0	0	0	0	0	0	0	0	0	0	0	0	0	0	0	0	0	0.0100271	0.00495522	-0.0198184	0.000233396
	Gov Eq 2 (23)	0	0	0	0	0	0	0	0	0	0	0	0	0	0	0	0	0	0	0	0	0	0	0	0	0	0	0	0	0	0	0	0	0	0	0	0	0	0	0	0	0	0	0	0	-0.00495522	0.597406	0	-1.18544
	Gov Eq 1 (24)	0	0	0	0	0	0	0	0	0	0	0	0	0	0	0	0	0	0	0	0	0	0	0	0	0	0	0	0	0	0	0	0	0	0	0	0	0	0	0	0	0	0	0	0	0	0	0.00979373	0.00483768
	Gov Eq 2 (24)	0	0	0	0	0	0	0	0	0	0	0	0	0	0	0	0	0	0	0	0	0	0	0	0	0	0	0	0	0	0	0	0	0	0	0	0	0	0	0	0	0	0	0	0	0	0	-0.00483768	0.578169
	Gov Eq 1 (25)	0	0	0	0	0	0	0	0	0	0	0	0	0	0	0	0	0	0	0	0	0	0	0	0	0	0	0	0	0	0	0	0	0	0	0	0	0	0	0	0	0	0	0	0	0	0	0	0
	Gov Eq 2 (25)	0	0	0	0	0	0	0	0	0	0	0	0	0	0	0	0	0	0	0	0	0	0	0	0	0	0	0	0	0	0	0	0	0	0	0	0	0	0	0	0	0	0	0	0	0	0	0	0
	Gov Eq 1 (26)	0	0	0	0	0	0	0	0	0	0	0	0	0	0	0	0	0	0	0	0	0	0	0	0	0	0	0	0	0	0	0	0	0	0	0	0	0	0	0	0	0	0	0	0	0	0	0	0
	Gov Eq 2 (26)	0	0	0	0	0	0	0	0	0	0	0	0	0	0	0	0	0	0	0	0	0	0	0	0	0	0	0	0	0	0	0	0	0	0	0	0	0	0	0	0	0	0	0	0	0	0	0	0
	Gov Eq 1 (27)	0	0	0	0	0	0	0	0	0	0	0	0	0	0	0	0	0	0	0	0	0	0	0	0	0	0	0	0	0	0	0	0	0	0	0	0	0	0	0	0	0	0	0	0	0	0	0	0
	Gov Eq 2 (27)	0	0	0	0	0	0	0	0	0	0	0	0	0	0	0	0	0	0	0	0	0	0	0	0	0	0	0	0	0	0	0	0	0	0	0	0	0	0	0	0	0	0	0	0	0	0	0	0
	Gov Eq 1 (28)	0	0	0	0	0	0	0	0	0	0	0	0	0	0	0	0	0	0	0	0	0	0	0	0	0	0	0	0	0	0	0	0	0	0	0	0	0	0	0	0	0	0	0	0	0	0	0	0
	Gov Eq 2 (28)	0	0	0	0	0	0	0	0	0	0	0	0	0	0	0	0	0	0	0	0	0	0	0	0	0	0	0	0	0	0	0	0	0	0	0	0	0	0	0	0	0	0	0	0	0	0	0	0
	Gov Eq 1 (29)	0	0	0	0	0	0	0	0	0	0	0	0	0	0	0	0	0	0	0	0	0	0	0	0	0	0	0	0	0	0	0	0	0	0	0	0	0	0	0	0	0	0	0	0	0	0	0	0
	Gov Eq 2 (29)	0	0	0	0	0	0	0	0	0	0	0	0	0	0	0	0	0	0	0	0	0	0	0	0	0	0	0	0	0	0	0	0	0	0	0	0	0	0	0	0	0	0	0	0	0	0	0	0
	Gov Eq 1 (30)	0	0	0	0	0	0	0	0	0	0	0	0	0	0	0	0	0	0	0	0	0	0	0	0	0	0	0	0	0	0	0	0	0	0	0	0	0	0	0	0	0	0	0	0	0	0	0	0
	Gov Eq 2 (30)	0	0	0	0	0	0	0	0	0	0	0	0	0	0	0	0	0	0	0	0	0	0	0	0	0	0	0	0	0	0	0	0	0	0	0	0	0	0	0	0	0	0	0	0	0	0	0	0
	Gov Eq 1 (31)	0	0	0	0	0	0	0	0	0	0	0	0	0	0	0	0	0	0	0	0	0	0	0	0	0	0	0	0	0	0	0	0	0	0	0	0	0	0	0	0	0	0	0	0	0	0	0	0
	Gov Eq 2 (31)	0	0	0	0	0	0	0	0	0	0	0	0	0	0	0	0	0	0	0	0	0	0	0	0	0	0	0	0	0	0	0	0	0	0	0	0	0	0	0	0	0	0	0	0	0	0	0	0
	Gov Eq 1 (32)	0	0	0	0	0	0	0	0	0	0	0	0	0	0	0	0	0	0	0	0	0	0	0	0	0	0	0	0	0	0	0	0	0	0	0	0	0	0	0	0	0	0	0	0	0	0	0	0
	Gov Eq 2 (32)	0	0	0	0	0	0	0	0	0	0	0	0	0	0	0	0	0	0	0	0	0	0	0	0	0	0	0	0	0	0	0	0	0	0	0	0	0	0	0	0	0	0	0	0	0	0	0	0
	Gov Eq 1 (33)	0	0	0	0	0	0	0	0	0	0	0	0	0	0	0	0	0	0	0	0	0	0	0	0	0	0	0	0	0	0	0	0	0	0	0	0	0	0	0	0	0	0	0	0	0	0	0	0
	Gov Eq 2 (33)	0	0	0	0	0	0	0	0	0	0	0	0	0	0	0	0	0	0	0	0	0	0	0	0	0	0	0	0	0	0	0	0	0	0	0	0	0	0	0	0	0	0	0	0	0	0	0	0
	Gov Eq 1 (34)	0	0	0	0	0	0	0	0	0	0	0	0	0	0	0	0	0	0	0	0	0	0	0	0	0	0	0	0	0	0	0	0	0	0	0	0	0	0	0	0	0	0	0	0	0	0	0	0
	Gov Eq 2 (34)	0	0	0	0	0	0	0	0	0	0	0	0	0	0	0	0	0	0	0	0	0	0	0	0	0	0	0	0	0	0	0	0	0	0	0	0	0	0	0	0	0	0	0	0	0	0	0	0
	Gov Eq 1 (35)	0	0	0	0	0	0	0	0	0	0	0	0	0	0	0	0	0	0	0	0	0	0	0	0	0	0	0	0	0	0	0	0	0	0	0	0	0	0	0	0	0	0	0	0	0	0	0	0
	Gov Eq 2 (35)	0	0	0	0	0	0	0	0	0	0	0	0	0	0	0	0	0	0	0	0	0	0	0	0	0	0	0	0	0	0	0	0	0	0	0	0	0	0	0	0	0	0	0	0	0	0	0	0
	Gov Eq 1 (36)	0	0	0	0	0	0	0	0	0	0	0	0	0	0	0	0	0	0	0	0	0	0	0	0	0	0	0	0	0	0	0	0	0	0	0	0	0	0	0	0	0	0	0	0	0	0	0	0
	Gov Eq 2 (36)	0	0	0	0	0	0	0	0	0	0	0	0	0	0	0	0	0	0	0	0	0	0	0	0	0	0	0	0	0	0	0	0	0	0	0	0	0	0	0	0	0	0	0	0	0	0	0	0
	Gov Eq 1 (37)	0	0	0	0	0	0	0	0	0	0	0	0	0	0	0	0	0	0	0	0	0	0	0	0	0	0	0	0	0	0	0	0	0	0	0	0	0	0	0	0	0	0	0	0	0	0	0	0
	Gov Eq 2 (37)	0	0	0	0	0	0	0	0	0	0	0	0	0	0	0	0	0	0	0	0	0	0	0	0	0	0	0	0	0	0	0	0	0	0	0	0	0	0	0	0	0	0	0	0	0	0	0	0
	Gov Eq 1 (38)	0	0	0	0	0	0	0	0	0	0	0	0	0	0	0	0	0	0	0	0	0	0	0	0	0	0	0	0	0	0	0	0	0	0	0	0	0	0	0	0	0	0	0	0	0	0	0	0
	Gov Eq 2 (38)	0	0	0	0	0	0	0	0	0	0	0	0	0	0	0	0	0	0	0	0	0	0	0	0	0	0	0	0	0	0	0	0	0	0	0	0	0	0	0	0	0	0	0	0	0	0	0	0
	Gov Eq 1 (39)	0	0	0	0	0	0	0	0	0	0	0	0	0	0	0	0	0	0	0	0	0	0	0	0	0	0	0	0	0	0	0	0	0	0	0	0	0	0	0	0	0	0	0	0	0	0	0	0
	Gov Eq 2 (39)	0	0	0	0	0	0	0	0	0	0	0	0	0	0	0	0	0	0	0	0	0	0	0	0	0	0	0	0	0	0	0	0	0	0	0	0	0	0	0	0	0	0	0	0	0	0	0	0
	Gov Eq 1 (40)	0	0	0	0	0	0	0	0	0	0	0	0	0	0	0	0	0	0	0	0	0	0	0	0	0	0	0	0	0	0	0	0	0	0	0	0	0	0	0	0	0	0	0	0	0	0	0	0
	Gov Eq 2 (40)	0	0	0	0	0	0	0	0	0	0	0	0	0	0	0	0	0	0	0	0	0	0	0	0	0	0	0	0	0	0	0	0	0	0	0	0	0	0	0	0	0	0	0	0	0	0	0	0
	Gov Eq 1 (41)	0	0	0	0	0	0	0	0	0	0	0	0	0	0	0	0	0	0	0	0	0	0	0	0	0	0	0	0	0	0	0	0	0	0	0	0	0	0	0	0	0	0	0	0	0	0	0	0
	Gov Eq 2 (41)	0	0	0	0	0	0	0	0	0	0	0	0	0	0	0	0	0	0	0	0	0	0	0	0	0	0	0	0	0	0	0	0	0	0	0	0	0	0	0	0	0	0	0	0	0	0	0	0
	Gov Eq 1 (42)	0	0	0	0	0	0	0	0	0	0	0	0	0	0	0	0	0	0	0	0	0	0	0	0	0	0	0	0	0	0	0	0	0	0	0	0	0	0	0	0	0	0	0	0	0	0	0	0
	Gov Eq 2 (42)	0	0	0	0	0	0	0	0	0	0	0	0	0	0	0	0	0	0	0	0	0	0	0	0	0	0	0	0	0	0	0	0	0	0	0	0	0	0	0	0	0	0	0	0	0	0	0	0
	Gov Eq 1 (43)	0	0	0	0	0	0	0	0	0	0	0	0	0	0	0	0	0	0	0	0	0	0	0	0	0	0	0	0	0	0	0	0	0	0	0	0	0	0	0	0	0	0	0	0	0	0	0	0
	Gov Eq 2 (43)	0	0	0	0	0	0	0	0	0	0	0	0	0	0	0	0	0	0	0	0	0	0	0	0	0	0	0	0	0	0	0	0	0	0	0	0	0	0	0	0	0	0	0	0	0	0	0	0
	Gov Eq 1 (44)	0	0	0	0	0	0	0	0	0	0	0	0	0	0	0	0	0	0	0	0	0	0	0	0	0	0	0	0	0	0	0	0	0	0	0	0	0	0	0	0	0	0	0	0	0	0	0	0
	Gov Eq 2 (44)	0	0	0	0	0	0	0	0	0	0	0	0	0	0	0	0	0	0	0	0	0	0	0	0	0	0	0	0	0	0	0	0	0	0	0	0	0	0	0	0	0	0	0	0	0	0	0	0
	Gov Eq 1 (45)	0	0	0	0	0	0	0	0	0	0	0	0	0	0	0	0	0	0	0	0	0	0	0	0	0	0	0	0	0	0	0	0	0	0	0	0	0	0	0	0	0	0	0	0	0	0	0	0
	Gov Eq 2 (45)	0	0	0	0	0	0	0	0	0	0	0	0	0	0	0	0	0	0	0	0	0	0	0	0	0	0	0	0	0	0	0	0	0	0	0	0	0	0	0	0	0	0	0	0	0	0	0	0
	Gov Eq 1 (46)	0	0	0	0	0	0	0	0	0	0	0	0	0	0	0	0	0	0	0	0	0	0	0	0	0	0	0	0	0	0	0	0	0	0	0	0	0	0	0	0	0	0	0	0	0	0	0	0
	Gov Eq 2 (46)	0	0	0	0	0	0	0	0	0	0	0	0	0	0	0	0	0	0	0	0	0	0	0	0	0	0	0	0	0	0	0	0	0	0	0	0	0	0	0	0	0	0	0	0	0	0	0	0
	Gov Eq 1 (47)	0	0	0	0	0	0	0	0	0	0	0	0	0	0	0	0	0	0	0	0	0	0	0	0	0	0	0	0	0	0	0	0	0	0	0	0	0	0	0	0	0	0	0	0	0	0	0	0
	Gov Eq 2 (47)	0	0	0	0	0	0	0	0	0	0	0	0	0	0	0	0	0	0	0	0	0	0	0	0	0	0	0	0	0	0	0	0	0	0	0	0	0	0	0	0	0	0	0	0	0	0	0	0
	Gov Eq 1 (48)	0	0	0	0	0	0	0	0	0	0	0	0	0	0	0	0	0	0	0	0	0	0	0	0	0	0	0	0	0	0	0	0	0	0	0	0	0	0	0	0	0	0	0	0	0	0	0	0
	Gov Eq 2 (48)	0	0	0	0	0	0	0	0	0	0	0	0	0	0	0	0	0	0	0	0	0	0	0	0	0	0	0	0	0	0	0	0	0	0	0	0	0	0	0	0	0	0	0	0	0	0	0	0
	Gov Eq 1 (49)	0	0	0	0	0	0	0	0	0	0	0	0	0	0	0	0	0	0	0	0	0	0	0	0	0	0	0	0	0	0	0	0	0	0	0	0	0	0	0	0	0	0	0	0	0	0	0	0
	Gov Eq 2 (49)	0	0	0	0	0	0	0	0	0	0	0	0	0	0	0	0	0	0	0	0	0	0	0	0	0	0	0	0	0	0	0	0	0	0	0	0	0	0	0	0	0	0	0	0	0	0	0	0
	Bo Co 1 (1)	0	0	1	0	0	0	0	0	0	0	0	0	0	0	0	0	0	0	0	0	0	0	0	0	0	0	0	0	0	0	0	0	0	0	0	0	0	0	0	0	0	0	0	0	0	0	0	0
	Bo Co 2 (1)	0	0	0	1	0	0	0	0	0	0	0	0	0	0	0	0	0	0	0	0	0	0	0	0	0	0	0	0	0	0	0	0	0	0	0	0	0	0	0	0	0	0	0	0	0	0	0	0
	Bo Co 1 (49)	0	0	0	0	0	0	0	0	0	0	0	0	0	0	0	0	0	0	0	0	0	0	0	0	0	0	0	0	0	0	0	0	0	0	0	0	0	0	0	0	0	0	0	0	0	0	0	0
	Bo Co 2 (49)	0	0	0	0	0	0	0	0	0	0	0	0	0	0	0	0	0	0	0	0	0	0	0	0	0	0	0	0	0	0	0	0	0	0	0	0	0	0	0	0	0	0	0	0	0	0	0	0
[truncated: 54 more columns]

## Sheet: Pinned-pinned beam
		Vibration analysis of a tapered pinned-pinned Timoshenko beam
										Governing equations
	W-F FDM approximation
		Nine-point grid
	n =	8		n =	0.3
		0.125		k =	0.833333
		0.0312		Er = E0 =	200	Gpa
	kRIr =	0.01		E1 =	70	Gpa
				rr = r0 =	5700	kg/m3
		0.500801		r1 =	2702	kg/m3
		5.8261				Determinant =	-7.90726e-06
					PSM	Shahba et al.	9 pt
		0.00828696		0.530366	5.7128	5.7118	5.8261
		0.5
			Nodes	1		2		3		4		5		6		7		8		9
				0		0.125		0.25		0.375		0.5		0.625		0.75		0.875		1
				1		0.772476		0.586182		0.435806		0.316406		0.223404		0.152588		0.100113		0.0625
				1		0.878906		0.765625		0.660156		0.5625		0.472656		0.390625		0.316406		0.25
				1		0.991782		0.967127		0.926036		0.868509		0.794545		0.704145		0.597308		0.474035
				1		0.989844		0.959375		0.908594		0.8375		0.746094		0.634375		0.502344		0.35
				-0.125		-0.13385		-0.136035		-0.132507		-0.124219		-0.112122		-0.097168		-0.0803101		-0.0625
				-0.25		-0.219592		-0.18449		-0.148394		-0.114038		-0.0833005		-0.0573158		-0.0365864		-0.0210938
		W0	hkF0	W1	hkF1	W2	hkF2	W3	hkF3	W4	hkF4	W5	hkF5	W6	hkF6	W7	hkF7	W8	hkF8	W9	hkF9	W10	hkF10
	Gov Eq 1 (1)	0.532101	0.250401	-0.993316	0.0626002	0.469501	-0.250401	0	0	0	0	0	0	0	0	0	0	0	0	0	0	0	0
	Gov Eq 2 (1)	-0.250401	1.125	0	-2.4955	0.250401	0.875	0	0	0	0	0	0	0	0	0	0	0	0	0	0	0	0
	Gov Eq 1 (2)	0	0	0.469203	0.217844	-0.86415	0.0670323	0.402171	-0.217844	0	0	0	0	0	0	0	0	0	0	0	0	0	0
	Gov Eq 2 (2)	0	0	-0.217844	0.874427	0	-1.96089	0.217844	0.654835	0	0	0	0	0	0	0	0	0	0	0	0	0	0
	Gov Eq 1 (3)	0	0	0	0	0.401913	0.183925	-0.729562	0.0681266	0.333786	-0.183925	0	0	0	0	0	0	0	0	0	0	0	0
	Gov Eq 2 (3)	0	0	0	0	-0.183925	0.654613	0	-1.48958	0.183925	0.470123	0	0	0	0	0	0	0	0	0	0	0	0
	Gov Eq 1 (4)	0	0	0	0	0	0	0.333567	0.150194	-0.595709	0.0663598	0.267208	-0.150194	0	0	0	0	0	0	0	0	0	0
	Gov Eq 2 (4)	0	0	0	0	0	0	-0.150194	0.470168	0	-1.09019	0.150194	0.321774	0	0	0	0	0	0	0	0	0	0
	Gov Eq 1 (5)	0	0	0	0	0	0	0	0	0.267029	0.117962	-0.4678	0.0622089	0.20482	-0.117962	0	0	0	0	0	0	0	0
	Gov Eq 2 (5)	0	0	0	0	0	0	0	0	-0.117962	0.322009	0	-0.764447	0.117962	0.207971	0	0	0	0	0	0	0	0
	Gov Eq 1 (6)	0	0	0	0	0	0	0	0	0	0	0.204681	0.0883028	-0.350099	0.0561506	0.14853	-0.0883028	0	0	0	0	0	0
	Gov Eq 2 (6)	0	0	0	0	0	0	0	0	0	0	-0.0883028	0.208331	0	-0.509025	0.0883028	0.12503	0	0	0	0	0	0
	Gov Eq 1 (7)	0	0	0	0	0	0	0	0	0	0	0	0	0.148431	0.06205	-0.24592	0.0486618	0.099769	-0.06205	0	0	0	0
	Gov Eq 2 (7)	0	0	0	0	0	0	0	0	0	0	0	0	-0.06205	0.125456	0	-0.317126	0.06205	0.06814	0	0	0	0
	Gov Eq 1 (8)	0	0	0	0	0	0	0	0	0	0	0	0	0	0	0.0997094	0.0397999	-0.157633	0.0402194	0.05949	-0.0397999	0	0
	Gov Eq 2 (8)	0	0	0	0	0	0	0	0	0	0	0	0	0	0	-0.0397999	0.0685843	0	-0.179865	0.0397999	0.0319979	0	0
	Gov Eq 1 (9)	0	0	0	0	0	0	0	0	0	0	0	0	0	0	0	0	0.0594702	0.0219101	-0.0866581	0.0313001	0.0281701	-0.0219101
	Gov Eq 2 (9)	0	0	0	0	0	0	0	0	0	0	0	0	0	0	0	0	-0.0219101	0.0324219	0	-0.087413	0.0219101	0.0113281
	Bo Co 1 (1)	0	0	1	0	0	0	0	0	0	0	0	0	0	0	0	0	0	0	0	0	0	0
	Bo Co 2 (1)	0	1	0	0	0	-1	0	0	0	0	0	0	0	0	0	0	0	0	0	0	0	0
	Bo Co 1 (9)	0	0	0	0	0	0	0	0	0	0	0	0	0	0	0	0	0	0	1	0	0	0
	Bo Co 2 (9)	0	0	0	0	0	0	0	0	0	0	0	0	0	0	0	0	0	1	0	0	0	-1
										Governing equations
	W-F FDM approximation
		17-point grid
	n =	16
		0.0625
		0.0312		Er = E0 =	200	Gpa
	kRIr =	0.01		E1 =	70	Gpa
				rr = r0 =	5700	kg/m3
		0.1252		r1 =	2702	kg/m3
		5.70721				Determinant =	-7.13775e-07
					PSM	Shahba et al.	9 pt	17 pt
		0.000497012		0.127235	5.7128	5.7118	5.8261	5.70721
		0.5
			Nodes	1		2		3		4		5		6		7		8		9		10		11		12		13		14		15		16		17
				0		0.0625		0.125		0.1875		0.25		0.3125		0.375		0.4375		0.5		0.5625		0.625		0.6875		0.75		0.8125		0.875		0.9375		1
				1		0.880738		0.772476		0.674516		0.586182		0.506822		0.435806		0.372529		0.316406		0.266877		0.223404		0.185472		0.152588		0.124284		0.100113		0.0796518		0.0625
				1		0.938477		0.878906		0.821289		0.765625		0.711914		0.660156		0.610352		0.5625		0.516602		0.472656		0.430664		0.390625		0.352539		0.316406		0.282227		0.25
				1		0.997945		0.991782		0.981509		0.967127		0.948636		0.926036		0.899327		0.868509		0.833581		0.794545		0.751399		0.704145		0.652781		0.597308		0.537726		0.474035
				1		0.997461		0.989844		0.977148		0.959375		0.936523		0.908594		0.875586		0.8375		0.794336		0.746094		0.692773		0.634375		0.570898		0.502344		0.428711		0.35
				-0.0625		-0.0651588		-0.066925		-0.0678581		-0.0680176		-0.0674629		-0.0662537		-0.0644493		-0.0621094		-0.0592934		-0.0560608		-0.0524712		-0.048584		-0.0444588		-0.040155		-0.0357323		-0.03125
				-0.125		-0.117828		-0.109796		-0.101186		-0.0922451		-0.0831871		-0.0741971		-0.0654312		-0.057019		-0.049065		-0.0416502		-0.0348346		-0.0286579		-0.0231422		-0.0182932		-0.014102		-0.0105469
		W0	hkF0	W1	hkF1	W2	hkF2	W3	hkF3	W4	hkF4	W5	hkF5	W6	hkF6	W7	hkF7	W8	hkF8	W9	hkF9	W10	hkF10	W11	hkF11	W12	hkF12	W13	hkF13	W14	hkF14	W15	hkF15	W16	hkF16	W17	hkF17	W18	hkF18
	Gov Eq 1 (1)	0.129113	0.0626002	-0.249904	0.00782502	0.121288	-0.0626002	0	0	0	0	0	0	0	0	0	0	0	0	0	0	0	0	0	0	0	0	0	0	0	0	0	0	0	0	0	0	0	0
	Gov Eq 2 (1)	-0.0626002	1.0625	0	-2.12393	0.0626002	0.9375	0	0	0	0	0	0	0	0	0	0	0	0	0	0	0	0	0	0	0	0	0	0	0	0	0	0	0	0	0	0	0	0
	Gov Eq 1 (2)	0	0	0.121278	0.0585996	-0.233933	0.00815791	0.11312	-0.0585996	0	0	0	0	0	0	0	0	0	0	0	0	0	0	0	0	0	0	0	0	0	0	0	0	0	0	0	0	0	0
	Gov Eq 2 (2)	0	0	-0.0585996	0.937416	0	-1.87308	0.0585996	0.819588	0	0	0	0	0	0	0	0	0	0	0	0	0	0	0	0	0	0	0	0	0	0	0	0	0	0	0	0	0	0
	Gov Eq 1 (3)	0	0	0	0	0.113111	0.0544609	-0.21741	0.00837904	0.104732	-0.0544609	0	0	0	0	0	0	0	0	0	0	0	0	0	0	0	0	0	0	0	0	0	0	0	0	0	0	0	0
	Gov Eq 2 (3)	0	0	0	0	-0.0544609	0.819529	0	-1.63721	0.0544609	0.709733	0	0	0	0	0	0	0	0	0	0	0	0	0	0	0	0	0	0	0	0	0	0	0	0	0	0	0	0
	Gov Eq 1 (4)	0	0	0	0	0	0	0.104724	0.050238	-0.200551	0.00849586	0.096228	-0.050238	0	0	0	0	0	0	0	0	0	0	0	0	0	0	0	0	0	0	0	0	0	0	0	0	0	0
	Gov Eq 2 (4)	0	0	0	0	0	0	-0.050238	0.709695	0	-1.41784	0.050238	0.608509	0	0	0	0	0	0	0	0	0	0	0	0	0	0	0	0	0	0	0	0	0	0	0	0	0	0
	Gov Eq 1 (5)	0	0	0	0	0	0	0	0	0.0962202	0.0459812	-0.183557	0.00851582	0.0877044	-0.0459812	0	0	0	0	0	0	0	0	0	0	0	0	0	0	0	0	0	0	0	0	0	0	0	0
	Gov Eq 2 (5)	0	0	0	0	0	0	0	0	-0.0459812	0.608491	0	-1.21598	0.0459812	0.516245	0	0	0	0	0	0	0	0	0	0	0	0	0	0	0	0	0	0	0	0	0	0	0	0
	Gov Eq 1 (6)	0	0	0	0	0	0	0	0	0	0	0.0876973	0.041737	-0.166613	0.00844638	0.0792509	-0.041737	0	0	0	0	0	0	0	0	0	0	0	0	0	0	0	0	0	0	0	0	0	0
	Gov Eq 2 (6)	0	0	0	0	0	0	0	0	0	0	-0.041737	0.516244	0	-1.03216	0.041737	0.433057	0	0	0	0	0	0	0	0	0	0	0	0	0	0	0	0	0	0	0	0	0	0
	Gov Eq 1 (7)	0	0	0	0	0	0	0	0	0	0	0	0	0.0792444	0.0375484	-0.14989	0.00829498	0.0709494	-0.0375484	0	0	0	0	0	0	0	0	0	0	0	0	0	0	0	0	0	0	0	0
	Gov Eq 2 (7)	0	0	0	0	0	0	0	0	0	0	0	0	-0.0375484	0.433069	0	-0.866525	0.0375484	0.358872	0	0	0	0	0	0	0	0	0	0	0	0	0	0	0	0	0	0	0	0
	Gov Eq 1 (8)	0	0	0	0	0	0	0	0	0	0	0	0	0	0	0.0709435	0.0334545	-0.133545	0.00806907	0.0628744	-0.0334545	0	0	0	0	0	0	0	0	0	0	0	0	0	0	0	0	0	0
	Gov Eq 2 (8)	0	0	0	0	0	0	0	0	0	0	0	0	0	0	-0.0334545	0.358897	0	-0.718845	0.0334545	0.293466	0	0	0	0	0	0	0	0	0	0	0	0	0	0	0	0	0	0
	Gov Eq 1 (9)	0	0	0	0	0	0	0	0	0	0	0	0	0	0	0	0	0.0628691	0.0294905	-0.117719	0.00777611	0.055093	-0.0294905	0	0	0	0	0	0	0	0	0	0	0	0	0	0	0	0
	Gov Eq 2 (9)	0	0	0	0	0	0	0	0	0	0	0	0	0	0	0	0	-0.0294905	0.2935	0	-0.588612	0.0294905	0.236481	0	0	0	0	0	0	0	0	0	0	0	0	0	0	0	0
	Gov Eq 1 (10)	0	0	0	0	0	0	0	0	0	0	0	0	0	0	0	0	0	0	0.0550884	0.0256883	-0.102539	0.00742355	0.0476648	-0.0256883	0	0	0	0	0	0	0	0	0	0	0	0	0	0
	Gov Eq 2 (10)	0	0	0	0	0	0	0	0	0	0	0	0	0	0	0	0	0	0	-0.0256883	0.236523	0	-0.475074	0.0256883	0.187458	0	0	0	0	0	0	0	0	0	0	0	0	0	0
	Gov Eq 1 (11)	0	0	0	0	0	0	0	0	0	0	0	0	0	0	0	0	0	0	0	0	0.0476608	0.0220757	-0.0881161	0.00701883	0.040642	-0.0220757	0	0	0	0	0	0	0	0	0	0	0	0
	Gov Eq 2 (11)	0	0	0	0	0	0	0	0	0	0	0	0	0	0	0	0	0	0	0	0	-0.0220757	0.187505	0	-0.377286	0.0220757	0.145855	0	0	0	0	0	0	0	0	0	0	0	0
	Gov Eq 1 (12)	0	0	0	0	0	0	0	0	0	0	0	0	0	0	0	0	0	0	0	0	0	0	0.0406385	0.0186769	-0.0745469	0.00656941	0.0340691	-0.0186769	0	0	0	0	0	0	0	0	0	0
	Gov Eq 2 (12)	0	0	0	0	0	0	0	0	0	0	0	0	0	0	0	0	0	0	0	0	0	0	-0.0186769	0.145907	0	-0.294156	0.0186769	0.111072	0	0	0	0	0	0	0	0	0	0
	Gov Eq 1 (13)	0	0	0	0	0	0	0	0	0	0	0	0	0	0	0	0	0	0	0	0	0	0	0	0	0.0340663	0.0155125	-0.0619133	0.00608273	0.0279836	-0.0155125	0	0	0	0	0	0	0	0
	Gov Eq 2 (13)	0	0	0	0	0	0	0	0	0	0	0	0	0	0	0	0	0	0	0	0	0	0	0	0	-0.0155125	0.111127	0	-0.224484	0.0155125	0.082469	0	0	0	0	0	0	0	0
	Gov Eq 1 (14)	0	0	0	0	0	0	0	0	0	0	0	0	0	0	0	0	0	0	0	0	0	0	0	0	0	0	0.0279814	0.0125992	-0.0502823	0.00556625	0.0224152	-0.0125992	0	0	0	0	0	0
	Gov Eq 2 (14)	0	0	0	0	0	0	0	0	0	0	0	0	0	0	0	0	0	0	0	0	0	0	0	0	0	0	-0.0125992	0.0825245	0	-0.167002	0.0125992	0.0593823	0	0	0	0	0	0
	Gov Eq 1 (15)	0	0	0	0	0	0	0	0	0	0	0	0	0	0	0	0	0	0	0	0	0	0	0	0	0	0	0	0	0.0224136	0.00994996	-0.0397059	0.00502742	0.0173862	-0.00994996	0	0	0	0
	Gov Eq 2 (15)	0	0	0	0	0	0	0	0	0	0	0	0	0	0	0	0	0	0	0	0	0	0	0	0	0	0	0	0	-0.00994996	0.0594377	0	-0.120406	0.00994996	0.0411445	0	0	0	0
	Gov Eq 1 (16)	0	0	0	0	0	0	0	0	0	0	0	0	0	0	0	0	0	0	0	0	0	0	0	0	0	0	0	0	0	0	0.0173853	0.00757422	-0.0302215	0.00447369	0.0129116	-0.00757422	0	0
	Gov Eq 2 (16)	0	0	0	0	0	0	0	0	0	0	0	0	0	0	0	0	0	0	0	0	0	0	0	0	0	0	0	0	0	0	-0.00757422	0.0411986	0	-0.0833892	0.00757422	0.0270966	0	0
	Gov Eq 1 (17)	0	0	0	0	0	0	0	0	0	0	0	0	0	0	0	0	0	0	0	0	0	0	0	0	0	0	0	0	0	0	0	0	0.0129113	0.00547751	-0.0218512	0.00391251	0.00899877	-0.00547751
	Gov Eq 2 (17)	0	0	0	0	0	0	0	0	0	0	0	0	0	0	0	0	0	0	0	0	0	0	0	0	0	0	0	0	0	0	0	0	-0.00547751	0.0271484	0	-0.0546673	0.00547751	0.0166016
	Bo Co 1 (1)	0	0	1	0	0	0	0	0	0	0	0	0	0	0	0	0	0	0	0	0	0	0	0	0	0	0	0	0	0	0	0	0	0	0	0	0	0	0
	Bo Co 2 (1)	0	1	0	0	0	-1	0	0	0	0	0	0	0	0	0	0	0	0	0	0	0	0	0	0	0	0	0	0	0	0	0	0	0	0	0	0	0	0
	Bo Co 1 (17)	0	0	0	0	0	0	0	0	0	0	0	0	0	0	0	0	0	0	0	0	0	0	0	0	0	0	0	0	0	0	0	0	0	0	1	0	0	0
	Bo Co 2 (17)	0	0	0	0	0	0	0	0	0	0	0	0	0	0	0	0	0	0	0	0	0	0	0	0	0	0	0	0	0	0	0	0	0	1	0	0	0	-1
										Governing equations
	W-F FDM approximation
		33-point grid
	n =	32
		0.03125
		0.0312		Er = E0 =	200	Gpa
	kRIr =	0.01		E1 =	70	Gpa
				rr = r0 =	5700	kg/m3
		0.0313001		r1 =	2702	kg/m3
		5.70501				Determinant =	-4.34428e-08
					PSM	Shahba et al.	9 pt	17 pt	33 pt
		3.10394e-05		0.0317843	5.7128	5.7118	5.8261	5.70721	5.70501
		0.5
			Nodes	1		2		3		4		5		6		7		8		9		10		11		12		13		14		15		16		17		18		19		20		21		22		23
				0		0.03125		0.0625		0.09375		0.125		0.15625		0.1875		0.21875		0.25		0.28125		0.3125		0.34375		0.375		0.40625		0.4375		0.46875		0.5		0.53125		0.5625		0.59375		0.625		0.65625		0.6875
				1		0.93895		0.880738		0.825276		0.772476		0.722251		0.674516		0.629187		0.586182		0.54542		0.506822		0.470309		0.435806		0.403237		0.372529		0.343609		0.316406		0.290852		0.266877		0.244416		0.223404		0.203776		0.185472
				1		0.968994		0.938477		0.908447		0.878906		0.849854		0.821289		0.793213		0.765625		0.738525		0.711914		0.685791		0.660156		0.63501		0.610352		0.586182		0.5625		0.539307		0.516602		0.494385		0.472656		0.451416		0.430664
				1		0.999486		0.997945		0.995377		0.991782		0.987159		0.981509		0.974832		0.967127		0.958395		0.948636		0.93785		0.926036		0.913195		0.899327		0.884432		0.868509		0.851559		0.833581		0.814577		0.794545		0.773486		0.751399
				1		0.999365		0.997461		0.994287		0.989844		0.984131		0.977148		0.968896		0.959375		0.948584		0.936523		0.923193		0.908594		0.892725		0.875586		0.857178		0.8375		0.816553		0.794336		0.77085		0.746094		0.720068		0.692773
				-0.03125		-0.0319724		-0.0325794		-0.0330749		-0.0334625		-0.033746		-0.0339291		-0.0340154		-0.0340088		-0.0339129		-0.0337315		-0.0334682		-0.0331268		-0.0327111		-0.0322247		-0.0316713		-0.0310547		-0.0303786		-0.0296467		-0.0288627		-0.0280304		-0.0271534		-0.0262356
				-0.0625		-0.06077		-0.0589138		-0.0569505		-0.0548981		-0.0527737		-0.0505932		-0.0483715		-0.0461226		-0.0438592		-0.0415935		-0.0393366		-0.0370985		-0.0348887		-0.0327156		-0.0305869		-0.0285095		-0.0264896		-0.0245325		-0.022643		-0.0208251		-0.0190823		-0.0174173
		W0	hkF0	W1	hkF1	W2	hkF2	W3	hkF3	W4	hkF4	W5	hkF5	W6	hkF6	W7	hkF7	W8	hkF8	W9	hkF9	W10	hkF10	W11	hkF11	W12	hkF12	W13	hkF13	W14	hkF14	W15	hkF15	W16	hkF16	W17	hkF17	W18	hkF18	W19	hkF19	W20	hkF20	W21	hkF21	W22	hkF22	W23	hkF23
	Gov Eq 1 (1)	0.0317891	0.01565	-0.0625691	0.000978128	0.030811	-0.01565	0	0	0	0	0	0	0	0	0	0	0	0	0	0	0	0	0	0	0	0	0	0	0	0	0	0	0	0	0	0	0	0	0	0	0	0	0	0	0	0	0	0
	Gov Eq 2 (1)	-0.01565	1.03125	0	-2.03098	0.01565	0.96875	0	0	0	0	0	0	0	0	0	0	0	0	0	0	0	0	0	0	0	0	0	0	0	0	0	0	0	0	0	0	0	0	0	0	0	0	0	0	0	0	0	0
	Gov Eq 1 (2)	0	0	0.0308107	0.0151552	-0.0605906	0.00100074	0.02981	-0.0151552	0	0	0	0	0	0	0	0	0	0	0	0	0	0	0	0	0	0	0	0	0	0	0	0	0	0	0	0	0	0	0	0	0	0	0	0	0	0	0	0
	Gov Eq 2 (2)	0	0	-0.0151552	0.968739	0	-1.90672	0.0151552	0.907969	0	0	0	0	0	0	0	0	0	0	0	0	0	0	0	0	0	0	0	0	0	0	0	0	0	0	0	0	0	0	0	0	0	0	0	0	0	0	0	0
	Gov Eq 1 (3)	0	0	0	0	0.0298097	0.0146499	-0.0585705	0.00101974	0.0287899	-0.0146499	0	0	0	0	0	0	0	0	0	0	0	0	0	0	0	0	0	0	0	0	0	0	0	0	0	0	0	0	0	0	0	0	0	0	0	0	0	0
	Gov Eq 2 (3)	0	0	0	0	-0.0146499	0.907959	0	-1.78602	0.0146499	0.849045	0	0	0	0	0	0	0	0	0	0	0	0	0	0	0	0	0	0	0	0	0	0	0	0	0	0	0	0	0	0	0	0	0	0	0	0	0	0
	Gov Eq 1 (4)	0	0	0	0	0	0	0.0287897	0.014136	-0.056516	0.00103525	0.0277544	-0.014136	0	0	0	0	0	0	0	0	0	0	0	0	0	0	0	0	0	0	0	0	0	0	0	0	0	0	0	0	0	0	0	0	0	0	0	0
	Gov Eq 2 (4)	0	0	0	0	0	0	-0.014136	0.849037	0	-1.66913	0.014136	0.792086	0	0	0	0	0	0	0	0	0	0	0	0	0	0	0	0	0	0	0	0	0	0	0	0	0	0	0	0	0	0	0	0	0	0	0	0
	Gov Eq 1 (5)	0	0	0	0	0	0	0	0	0.0277541	0.0136152	-0.0544338	0.00104738	0.0267067	-0.0136152	0	0	0	0	0	0	0	0	0	0	0	0	0	0	0	0	0	0	0	0	0	0	0	0	0	0	0	0	0	0	0	0	0	0
	Gov Eq 2 (5)	0	0	0	0	0	0	0	0	-0.0136152	0.79208	0	-1.55625	0.0136152	0.737182	0	0	0	0	0	0	0	0	0	0	0	0	0	0	0	0	0	0	0	0	0	0	0	0	0	0	0	0	0	0	0	0	0	0
	Gov Eq 1 (6)	0	0	0	0	0	0	0	0	0	0	0.0267065	0.0130892	-0.0523307	0.00105625	0.0256502	-0.0130892	0	0	0	0	0	0	0	0	0	0	0	0	0	0	0	0	0	0	0	0	0	0	0	0	0	0	0	0	0	0	0	0
	Gov Eq 2 (6)	0	0	0	0	0	0	0	0	0	0	-0.0130892	0.737176	0	-1.44753	0.0130892	0.684403	0	0	0	0	0	0	0	0	0	0	0	0	0	0	0	0	0	0	0	0	0	0	0	0	0	0	0	0	0	0	0	0
	Gov Eq 1 (7)	0	0	0	0	0	0	0	0	0	0	0	0	0.02565	0.0125595	-0.0502129	0.00106198	0.024588	-0.0125595	0	0	0	0	0	0	0	0	0	0	0	0	0	0	0	0	0	0	0	0	0	0	0	0	0	0	0	0	0	0
	Gov Eq 2 (7)	0	0	0	0	0	0	0	0	0	0	0	0	-0.0125595	0.684399	0	-1.34311	0.0125595	0.633805	0	0	0	0	0	0	0	0	0	0	0	0	0	0	0	0	0	0	0	0	0	0	0	0	0	0	0	0	0	0
	Gov Eq 1 (8)	0	0	0	0	0	0	0	0	0	0	0	0	0	0	0.0245877	0.0120277	-0.0480868	0.00106469	0.0235231	-0.0120277	0	0	0	0	0	0	0	0	0	0	0	0	0	0	0	0	0	0	0	0	0	0	0	0	0	0	0	0
	Gov Eq 2 (8)	0	0	0	0	0	0	0	0	0	0	0	0	0	0	-0.0120277	0.633803	0	-1.24309	0.0120277	0.585431	0	0	0	0	0	0	0	0	0	0	0	0	0	0	0	0	0	0	0	0	0	0	0	0	0	0	0	0
	Gov Eq 1 (9)	0	0	0	0	0	0	0	0	0	0	0	0	0	0	0	0	0.0235228	0.0114953	-0.0459582	0.00106448	0.0224583	-0.0114953	0	0	0	0	0	0	0	0	0	0	0	0	0	0	0	0	0	0	0	0	0	0	0	0	0	0
	Gov Eq 2 (9)	0	0	0	0	0	0	0	0	0	0	0	0	0	0	0	0	-0.0114953	0.585429	0	-1.14755	0.0114953	0.539307	0	0	0	0	0	0	0	0	0	0	0	0	0	0	0	0	0	0	0	0	0	0	0	0	0	0
	Gov Eq 1 (10)	0	0	0	0	0	0	0	0	0	0	0	0	0	0	0	0	0	0	0.0224581	0.0109637	-0.0438328	0.00106148	0.0213966	-0.0109637	0	0	0	0	0	0	0	0	0	0	0	0	0	0	0	0	0	0	0	0	0	0	0	0
	Gov Eq 2 (10)	0	0	0	0	0	0	0	0	0	0	0	0	0	0	0	0	0	0	-0.0109637	0.539306	0	-1.05651	0.0109637	0.495447	0	0	0	0	0	0	0	0	0	0	0	0	0	0	0	0	0	0	0	0	0	0	0	0
	Gov Eq 1 (11)	0	0	0	0	0	0	0	0	0	0	0	0	0	0	0	0	0	0	0	0	0.0213964	0.0104343	-0.0417161	0.0010558	0.0203406	-0.0104343	0	0	0	0	0	0	0	0	0	0	0	0	0	0	0	0	0	0	0	0	0	0
	Gov Eq 2 (11)	0	0	0	0	0	0	0	0	0	0	0	0	0	0	0	0	0	0	0	0	-0.0104343	0.495447	0	-0.970016	0.0104343	0.453854	0	0	0	0	0	0	0	0	0	0	0	0	0	0	0	0	0	0	0	0	0	0
	Gov Eq 1 (12)	0	0	0	0	0	0	0	0	0	0	0	0	0	0	0	0	0	0	0	0	0	0	0.0203404	0.00990832	-0.0396133	0.00104756	0.0192929	-0.00990832	0	0	0	0	0	0	0	0	0	0	0	0	0	0	0	0	0	0	0	0
	Gov Eq 2 (12)	0	0	0	0	0	0	0	0	0	0	0	0	0	0	0	0	0	0	0	0	0	0	-0.00990832	0.453855	0	-0.888049	0.00990832	0.414518	0	0	0	0	0	0	0	0	0	0	0	0	0	0	0	0	0	0	0	0
	Gov Eq 1 (13)	0	0	0	0	0	0	0	0	0	0	0	0	0	0	0	0	0	0	0	0	0	0	0	0	0.0192927	0.00938711	-0.0375295	0.00103687	0.0182558	-0.00938711	0	0	0	0	0	0	0	0	0	0	0	0	0	0	0	0	0	0
	Gov Eq 2 (13)	0	0	0	0	0	0	0	0	0	0	0	0	0	0	0	0	0	0	0	0	0	0	0	0	-0.00938711	0.41452	0	-0.810588	0.00938711	0.377422	0	0	0	0	0	0	0	0	0	0	0	0	0	0	0	0	0	0
	Gov Eq 1 (14)	0	0	0	0	0	0	0	0	0	0	0	0	0	0	0	0	0	0	0	0	0	0	0	0	0	0	0.0182556	0.00887183	-0.0354693	0.00102386	0.0172317	-0.00887183	0	0	0	0	0	0	0	0	0	0	0	0	0	0	0	0
	Gov Eq 2 (14)	0	0	0	0	0	0	0	0	0	0	0	0	0	0	0	0	0	0	0	0	0	0	0	0	0	0	-0.00887183	0.377424	0	-0.737587	0.00887183	0.342536	0	0	0	0	0	0	0	0	0	0	0	0	0	0	0	0
	Gov Eq 1 (15)	0	0	0	0	0	0	0	0	0	0	0	0	0	0	0	0	0	0	0	0	0	0	0	0	0	0	0	0	0.0172316	0.00836362	-0.0334374	0.00100863	0.0162229	-0.00836362	0	0	0	0	0	0	0	0	0	0	0	0	0	0
	Gov Eq 2 (15)	0	0	0	0	0	0	0	0	0	0	0	0	0	0	0	0	0	0	0	0	0	0	0	0	0	0	0	0	-0.00836362	0.342539	0	-0.668983	0.00836362	0.309823	0	0	0	0	0	0	0	0	0	0	0	0	0	0
	Gov Eq 1 (16)	0	0	0	0	0	0	0	0	0	0	0	0	0	0	0	0	0	0	0	0	0	0	0	0	0	0	0	0	0	0	0.0162228	0.00786355	-0.0314381	0.000991314	0.0152314	-0.00786355	0	0	0	0	0	0	0	0	0	0	0	0
	Gov Eq 2 (16)	0	0	0	0	0	0	0	0	0	0	0	0	0	0	0	0	0	0	0	0	0	0	0	0	0	0	0	0	0	0	-0.00786355	0.309827	0	-0.604698	0.00786355	0.27924	0	0	0	0	0	0	0	0	0	0	0	0
	Gov Eq 1 (17)	0	0	0	0	0	0	0	0	0	0	0	0	0	0	0	0	0	0	0	0	0	0	0	0	0	0	0	0	0	0	0	0	0.0152313	0.00737264	-0.0294754	0.000972014	0.0142593	-0.00737264	0	0	0	0	0	0	0	0	0	0
	Gov Eq 2 (17)	0	0	0	0	0	0	0	0	0	0	0	0	0	0	0	0	0	0	0	0	0	0	0	0	0	0	0	0	0	0	0	0	-0.00737264	0.279245	0	-0.544638	0.00737264	0.250735	0	0	0	0	0	0	0	0	0	0
	Gov Eq 1 (18)	0	0	0	0	0	0	0	0	0	0	0	0	0	0	0	0	0	0	0	0	0	0	0	0	0	0	0	0	0	0	0	0	0	0	0.0142591	0.00689184	-0.0275531	0.000950852	0.0133083	-0.00689184	0	0	0	0	0	0	0	0
	Gov Eq 2 (18)	0	0	0	0	0	0	0	0	0	0	0	0	0	0	0	0	0	0	0	0	0	0	0	0	0	0	0	0	0	0	0	0	0	0	-0.00689184	0.25074	0	-0.488696	0.00689184	0.224251	0	0	0	0	0	0	0	0
	Gov Eq 1 (19)	0	0	0	0	0	0	0	0	0	0	0	0	0	0	0	0	0	0	0	0	0	0	0	0	0	0	0	0	0	0	0	0	0	0	0	0	0.0133081	0.00642208	-0.0256749	0.000927944	0.0123802	-0.00642208	0	0	0	0	0	0
	Gov Eq 2 (19)	0	0	0	0	0	0	0	0	0	0	0	0	0	0	0	0	0	0	0	0	0	0	0	0	0	0	0	0	0	0	0	0	0	0	0	0	-0.00642208	0.224256	0	-0.436754	0.00642208	0.199724	0	0	0	0	0	0
	Gov Eq 1 (20)	0	0	0	0	0	0	0	0	0	0	0	0	0	0	0	0	0	0	0	0	0	0	0	0	0	0	0	0	0	0	0	0	0	0	0	0	0	0	0.01238	0.00596417	-0.0238442	0.000903405	0.0114766	-0.00596417	0	0	0	0
	Gov Eq 2 (20)	0	0	0	0	0	0	0	0	0	0	0	0	0	0	0	0	0	0	0	0	0	0	0	0	0	0	0	0	0	0	0	0	0	0	0	0	0	0	-0.00596417	0.19973	0	-0.388681	0.00596417	0.177087	0	0	0	0
	Gov Eq 1 (21)	0	0	0	0	0	0	0	0	0	0	0	0	0	0	0	0	0	0	0	0	0	0	0	0	0	0	0	0	0	0	0	0	0	0	0	0	0	0	0	0	0.0114765	0.00551892	-0.022064	0.000877354	0.0105992	-0.00551892	0	0
	Gov Eq 2 (21)	0	0	0	0	0	0	0	0	0	0	0	0	0	0	0	0	0	0	0	0	0	0	0	0	0	0	0	0	0	0	0	0	0	0	0	0	0	0	0	0	-0.00551892	0.177093	0	-0.344342	0.00551892	0.156268	0	0
	Gov Eq 1 (22)	0	0	0	0	0	0	0	0	0	0	0	0	0	0	0	0	0	0	0	0	0	0	0	0	0	0	0	0	0	0	0	0	0	0	0	0	0	0	0	0	0	0	0.0105991	0.00508705	-0.0203374	0.000849905	0.00974915	-0.00508705
	Gov Eq 2 (22)	0	0	0	0	0	0	0	0	0	0	0	0	0	0	0	0	0	0	0	0	0	0	0	0	0	0	0	0	0	0	0	0	0	0	0	0	0	0	0	0	0	0	-0.00508705	0.156274	0	-0.30359	0.00508705	0.137192
	Gov Eq 1 (23)	0	0	0	0	0	0	0	0	0	0	0	0	0	0	0	0	0	0	0	0	0	0	0	0	0	0	0	0	0	0	0	0	0	0	0	0	0	0	0	0	0	0	0	0	0.00974905	0.00466923	-0.0186669	0.000821176
	Gov Eq 2 (23)	0	0	0	0	0	0	0	0	0	0	0	0	0	0	0	0	0	0	0	0	0	0	0	0	0	0	0	0	0	0	0	0	0	0	0	0	0	0	0	0	0	0	0	0	-0.00466923	0.137198	0	-0.266274
	Gov Eq 1 (24)	0	0	0	0	0	0	0	0	0	0	0	0	0	0	0	0	0	0	0	0	0	0	0	0	0	0	0	0	0	0	0	0	0	0	0	0	0	0	0	0	0	0	0	0	0	0	0.00892778	0.00426607
	Gov Eq 2 (24)	0	0	0	0	0	0	0	0	0	0	0	0	0	0	0	0	0	0	0	0	0	0	0	0	0	0	0	0	0	0	0	0	0	0	0	0	0	0	0	0	0	0	0	0	0	0	-0.00426607	0.119788
	Gov Eq 1 (25)	0	0	0	0	0	0	0	0	0	0	0	0	0	0	0	0	0	0	0	0	0	0	0	0	0	0	0	0	0	0	0	0	0	0	0	0	0	0	0	0	0	0	0	0	0	0	0	0
	Gov Eq 2 (25)	0	0	0	0	0	0	0	0	0	0	0	0	0	0	0	0	0	0	0	0	0	0	0	0	0	0	0	0	0	0	0	0	0	0	0	0	0	0	0	0	0	0	0	0	0	0	0	0
	Gov Eq 1 (26)	0	0	0	0	0	0	0	0	0	0	0	0	0	0	0	0	0	0	0	0	0	0	0	0	0	0	0	0	0	0	0	0	0	0	0	0	0	0	0	0	0	0	0	0	0	0	0	0
	Gov Eq 2 (26)	0	0	0	0	0	0	0	0	0	0	0	0	0	0	0	0	0	0	0	0	0	0	0	0	0	0	0	0	0	0	0	0	0	0	0	0	0	0	0	0	0	0	0	0	0	0	0	0
	Gov Eq 1 (27)	0	0	0	0	0	0	0	0	0	0	0	0	0	0	0	0	0	0	0	0	0	0	0	0	0	0	0	0	0	0	0	0	0	0	0	0	0	0	0	0	0	0	0	0	0	0	0	0
	Gov Eq 2 (27)	0	0	0	0	0	0	0	0	0	0	0	0	0	0	0	0	0	0	0	0	0	0	0	0	0	0	0	0	0	0	0	0	0	0	0	0	0	0	0	0	0	0	0	0	0	0	0	0
	Gov Eq 1 (28)	0	0	0	0	0	0	0	0	0	0	0	0	0	0	0	0	0	0	0	0	0	0	0	0	0	0	0	0	0	0	0	0	0	0	0	0	0	0	0	0	0	0	0	0	0	0	0	0
	Gov Eq 2 (28)	0	0	0	0	0	0	0	0	0	0	0	0	0	0	0	0	0	0	0	0	0	0	0	0	0	0	0	0	0	0	0	0	0	0	0	0	0	0	0	0	0	0	0	0	0	0	0	0
	Gov Eq 1 (29)	0	0	0	0	0	0	0	0	0	0	0	0	0	0	0	0	0	0	0	0	0	0	0	0	0	0	0	0	0	0	0	0	0	0	0	0	0	0	0	0	0	0	0	0	0	0	0	0
	Gov Eq 2 (29)	0	0	0	0	0	0	0	0	0	0	0	0	0	0	0	0	0	0	0	0	0	0	0	0	0	0	0	0	0	0	0	0	0	0	0	0	0	0	0	0	0	0	0	0	0	0	0	0
	Gov Eq 1 (30)	0	0	0	0	0	0	0	0	0	0	0	0	0	0	0	0	0	0	0	0	0	0	0	0	0	0	0	0	0	0	0	0	0	0	0	0	0	0	0	0	0	0	0	0	0	0	0	0
	Gov Eq 2 (30)	0	0	0	0	0	0	0	0	0	0	0	0	0	0	0	0	0	0	0	0	0	0	0	0	0	0	0	0	0	0	0	0	0	0	0	0	0	0	0	0	0	0	0	0	0	0	0	0
	Gov Eq 1 (31)	0	0	0	0	0	0	0	0	0	0	0	0	0	0	0	0	0	0	0	0	0	0	0	0	0	0	0	0	0	0	0	0	0	0	0	0	0	0	0	0	0	0	0	0	0	0	0	0
	Gov Eq 2 (31)	0	0	0	0	0	0	0	0	0	0	0	0	0	0	0	0	0	0	0	0	0	0	0	0	0	0	0	0	0	0	0	0	0	0	0	0	0	0	0	0	0	0	0	0	0	0	0	0
	Gov Eq 1 (32)	0	0	0	0	0	0	0	0	0	0	0	0	0	0	0	0	0	0	0	0	0	0	0	0	0	0	0	0	0	0	0	0	0	0	0	0	0	0	0	0	0	0	0	0	0	0	0	0
	Gov Eq 2 (32)	0	0	0	0	0	0	0	0	0	0	0	0	0	0	0	0	0	0	0	0	0	0	0	0	0	0	0	0	0	0	0	0	0	0	0	0	0	0	0	0	0	0	0	0	0	0	0	0
	Gov Eq 1 (33)	0	0	0	0	0	0	0	0	0	0	0	0	0	0	0	0	0	0	0	0	0	0	0	0	0	0	0	0	0	0	0	0	0	0	0	0	0	0	0	0	0	0	0	0	0	0	0	0
	Gov Eq 2 (33)	0	0	0	0	0	0	0	0	0	0	0	0	0	0	0	0	0	0	0	0	0	0	0	0	0	0	0	0	0	0	0	0	0	0	0	0	0	0	0	0	0	0	0	0	0	0	0	0
	Bo Co 1 (1)	0	0	1	0	0	0	0	0	0	0	0	0	0	0	0	0	0	0	0	0	0	0	0	0	0	0	0	0	0	0	0	0	0	0	0	0	0	0	0	0	0	0	0	0	0	0	0	0
	Bo Co 2 (1)	0	1	0	0	0	-1	0	0	0	0	0	0	0	0	0	0	0	0	0	0	0	0	0	0	0	0	0	0	0	0	0	0	0	0	0	0	0	0	0	0	0	0	0	0	0	0	0	0
	Bo Co 1 (33)	0	0	0	0	0	0	0	0	0	0	0	0	0	0	0	0	0	0	0	0	0	0	0	0	0	0	0	0	0	0	0	0	0	0	0	0	0	0	0	0	0	0	0	0	0	0	0	0
	Bo Co 2 (33)	0	0	0	0	0	0	0	0	0	0	0	0	0	0	0	0	0	0	0	0	0	0	0	0	0	0	0	0	0	0	0	0	0	0	0	0	0	0	0	0	0	0	0	0	0	0	0	0
										Governing equations
	W-F FDM approximation
		49-point grid
	n =	48
		0.0208333
		0.0312		Er = E0 =	200	Gpa
	kRIr =	0.01		E1 =	70	Gpa
				rr = r0 =	5700	kg/m3
		0.0139111		r1 =	2702	kg/m3
		5.70591				Determinant =	0.000159877
					PSM	Shahba et al.	9 pt	17 pt	33 pt	49 pt
		6.13317e-06		0.0141308	4.2390	4.2384	4.2497	4.2394	4.2384	5.70591
		0.5
			Nodes	1		2		3		4		5		6		7		8		9		10		11		12		13		14		15		16		17		18		19		20		21		22		23
				0		0.0208333		0.0416667		0.0625		0.0833333		0.104167		0.125		0.145833		0.166667		0.1875		0.208333		0.229167		0.25		0.270833		0.291667		0.3125		0.333333		0.354167		0.375		0.395833		0.416667		0.4375		0.458333
				1		0.95898		0.919235		0.880738		0.843464		0.807385		0.772476		0.738712		0.706067		0.674516		0.644034		0.614597		0.586182		0.558763		0.532317		0.506822		0.482253		0.458589		0.435806		0.413883		0.392798		0.372529		0.353055
				1		0.979275		0.958767		0.938477		0.918403		0.898546		0.878906		0.859484		0.840278		0.821289		0.802517		0.783963		0.765625		0.747504		0.729601		0.711914		0.694444		0.677192		0.660156		0.643338		0.626736		0.610352		0.594184
				1		0.999772		0.999087		0.997945		0.996347		0.994293		0.991782		0.988814		0.98539		0.981509		0.977172		0.972378		0.967127		0.96142		0.955256		0.948636		0.941559		0.934026		0.926036		0.91759		0.908687		0.899327		0.889511
				1		0.999718		0.998872		0.997461		0.995486		0.992947		0.989844		0.986176		0.981944		0.977148		0.971788		0.965864		0.959375		0.952322		0.944705		0.936523		0.927778		0.918468		0.908594		0.898155		0.887153		0.875586		0.863455
				-0.0208333		-0.021163		-0.0214582		-0.0217196		-0.0219479		-0.0221439		-0.0223083		-0.0224419		-0.0225453		-0.0226194		-0.0226648		-0.0226822		-0.0226725		-0.0226364		-0.0225745		-0.0224876		-0.0223765		-0.0222419		-0.0220846		-0.0219051		-0.0217044		-0.0214831		-0.021242
				-0.0416667		-0.0409078		-0.0401096		-0.0392759		-0.0384104		-0.0375169		-0.0365987		-0.0356592		-0.0347016		-0.0337288		-0.0327439		-0.0317495		-0.0307484		-0.029743		-0.0287358		-0.027729		-0.0267249		-0.0257253		-0.0247324		-0.0237478		-0.0227732		-0.0218104		-0.0208607
		W0	hkF0	W1	hkF1	W2	hkF2	W3	hkF3	W4	hkF4	W5	hkF5	W6	hkF6	W7	hkF7	W8	hkF8	W9	hkF9	W10	hkF10	W11	hkF11	W12	hkF12	W13	hkF13	W14	hkF14	W15	hkF15	W16	hkF16	W17	hkF17	W18	hkF18	W19	hkF19	W20	hkF20	W21	hkF21	W22	hkF22	W23	hkF23
	Gov Eq 1 (1)	0.0140561	0.00695557	-0.0278162	0.000289816	0.0137662	-0.00695557	0	0	0	0	0	0	0	0	0	0	0	0	0	0	0	0	0	0	0	0	0	0	0	0	0	0	0	0	0	0	0	0	0	0	0	0	0	0	0	0	0	0
	Gov Eq 2 (1)	-0.00695557	1.02083	0	-2.01377	0.00695557	0.979167	0	0	0	0	0	0	0	0	0	0	0	0	0	0	0	0	0	0	0	0	0	0	0	0	0	0	0	0	0	0	0	0	0	0	0	0	0	0	0	0	0	0
	Gov Eq 1 (2)	0	0	0.0137662	0.0068095	-0.027232	0.000294402	0.0134718	-0.0068095	0	0	0	0	0	0	0	0	0	0	0	0	0	0	0	0	0	0	0	0	0	0	0	0	0	0	0	0	0	0	0	0	0	0	0	0	0	0	0	0
	Gov Eq 2 (2)	0	0	-0.0068095	0.979163	0	-1.9309	0.0068095	0.938255	0	0	0	0	0	0	0	0	0	0	0	0	0	0	0	0	0	0	0	0	0	0	0	0	0	0	0	0	0	0	0	0	0	0	0	0	0	0	0	0
	Gov Eq 1 (3)	0	0	0	0	0.0134718	0.00666125	-0.0266391	0.000298509	0.0131732	-0.00666125	0	0	0	0	0	0	0	0	0	0	0	0	0	0	0	0	0	0	0	0	0	0	0	0	0	0	0	0	0	0	0	0	0	0	0	0	0	0
	Gov Eq 2 (3)	0	0	0	0	-0.00666125	0.938252	0	-1.84959	0.00666125	0.898143	0	0	0	0	0	0	0	0	0	0	0	0	0	0	0	0	0	0	0	0	0	0	0	0	0	0	0	0	0	0	0	0	0	0	0	0	0	0
	Gov Eq 1 (4)	0	0	0	0	0	0	0.0131732	0.00651107	-0.0260385	0.000302145	0.0128711	-0.00651107	0	0	0	0	0	0	0	0	0	0	0	0	0	0	0	0	0	0	0	0	0	0	0	0	0	0	0	0	0	0	0	0	0	0	0	0
	Gov Eq 2 (4)	0	0	0	0	0	0	-0.00651107	0.89814	0	-1.7699	0.00651107	0.858864	0	0	0	0	0	0	0	0	0	0	0	0	0	0	0	0	0	0	0	0	0	0	0	0	0	0	0	0	0	0	0	0	0	0	0	0
	Gov Eq 1 (5)	0	0	0	0	0	0	0	0	0.012871	0.00635918	-0.0254311	0.000305321	0.0125657	-0.00635918	0	0	0	0	0	0	0	0	0	0	0	0	0	0	0	0	0	0	0	0	0	0	0	0	0	0	0	0	0	0	0	0	0	0
	Gov Eq 2 (5)	0	0	0	0	0	0	0	0	-0.00635918	0.858862	0	-1.69191	0.00635918	0.820451	0	0	0	0	0	0	0	0	0	0	0	0	0	0	0	0	0	0	0	0	0	0	0	0	0	0	0	0	0	0	0	0	0	0
	Gov Eq 1 (6)	0	0	0	0	0	0	0	0	0	0	0.0125657	0.00620582	-0.0248178	0.000308048	0.0122576	-0.00620582	0	0	0	0	0	0	0	0	0	0	0	0	0	0	0	0	0	0	0	0	0	0	0	0	0	0	0	0	0	0	0	0
	Gov Eq 2 (6)	0	0	0	0	0	0	0	0	0	0	-0.00620582	0.820449	0	-1.61568	0.00620582	0.782932	0	0	0	0	0	0	0	0	0	0	0	0	0	0	0	0	0	0	0	0	0	0	0	0	0	0	0	0	0	0	0	0
	Gov Eq 1 (7)	0	0	0	0	0	0	0	0	0	0	0	0	0.0122576	0.00605121	-0.0241995	0.000310335	0.0119473	-0.00605121	0	0	0	0	0	0	0	0	0	0	0	0	0	0	0	0	0	0	0	0	0	0	0	0	0	0	0	0	0	0
	Gov Eq 2 (7)	0	0	0	0	0	0	0	0	0	0	0	0	-0.00605121	0.78293	0	-1.54126	0.00605121	0.746331	0	0	0	0	0	0	0	0	0	0	0	0	0	0	0	0	0	0	0	0	0	0	0	0	0	0	0	0	0	0
	Gov Eq 1 (8)	0	0	0	0	0	0	0	0	0	0	0	0	0	0	0.0119472	0.00589556	-0.023577	0.000312193	0.011635	-0.00589556	0	0	0	0	0	0	0	0	0	0	0	0	0	0	0	0	0	0	0	0	0	0	0	0	0	0	0	0
	Gov Eq 2 (8)	0	0	0	0	0	0	0	0	0	0	0	0	0	0	-0.00589556	0.74633	0	-1.46869	0.00589556	0.71067	0	0	0	0	0	0	0	0	0	0	0	0	0	0	0	0	0	0	0	0	0	0	0	0	0	0	0	0
	Gov Eq 1 (9)	0	0	0	0	0	0	0	0	0	0	0	0	0	0	0	0	0.011635	0.00573909	-0.0229513	0.000313631	0.0113214	-0.00573909	0	0	0	0	0	0	0	0	0	0	0	0	0	0	0	0	0	0	0	0	0	0	0	0	0	0
	Gov Eq 2 (9)	0	0	0	0	0	0	0	0	0	0	0	0	0	0	0	0	-0.00573909	0.710669	0	-1.39802	0.00573909	0.675968	0	0	0	0	0	0	0	0	0	0	0	0	0	0	0	0	0	0	0	0	0	0	0	0	0	0
	Gov Eq 1 (10)	0	0	0	0	0	0	0	0	0	0	0	0	0	0	0	0	0	0	0.0113213	0.005582	-0.022323	0.000314661	0.0110067	-0.005582	0	0	0	0	0	0	0	0	0	0	0	0	0	0	0	0	0	0	0	0	0	0	0	0
	Gov Eq 2 (10)	0	0	0	0	0	0	0	0	0	0	0	0	0	0	0	0	0	0	-0.005582	0.675966	0	-1.32927	0.005582	0.642238	0	0	0	0	0	0	0	0	0	0	0	0	0	0	0	0	0	0	0	0	0	0	0	0
	Gov Eq 1 (11)	0	0	0	0	0	0	0	0	0	0	0	0	0	0	0	0	0	0	0	0	0.0110066	0.00542449	-0.0216932	0.000315293	0.0106913	-0.00542449	0	0	0	0	0	0	0	0	0	0	0	0	0	0	0	0	0	0	0	0	0	0
	Gov Eq 2 (11)	0	0	0	0	0	0	0	0	0	0	0	0	0	0	0	0	0	0	0	0	-0.00542449	0.642237	0	-1.26249	0.00542449	0.609493	0	0	0	0	0	0	0	0	0	0	0	0	0	0	0	0	0	0	0	0	0	0
	Gov Eq 1 (12)	0	0	0	0	0	0	0	0	0	0	0	0	0	0	0	0	0	0	0	0	0	0	0.0106913	0.00526677	-0.0210624	0.000315536	0.0103758	-0.00526677	0	0	0	0	0	0	0	0	0	0	0	0	0	0	0	0	0	0	0	0
	Gov Eq 2 (12)	0	0	0	0	0	0	0	0	0	0	0	0	0	0	0	0	0	0	0	0	0	0	-0.00526677	0.609492	0	-1.19768	0.00526677	0.577743	0	0	0	0	0	0	0	0	0	0	0	0	0	0	0	0	0	0	0	0
	Gov Eq 1 (13)	0	0	0	0	0	0	0	0	0	0	0	0	0	0	0	0	0	0	0	0	0	0	0	0	0.0103757	0.00510902	-0.0204315	0.000315401	0.0100603	-0.00510902	0	0	0	0	0	0	0	0	0	0	0	0	0	0	0	0	0	0
	Gov Eq 2 (13)	0	0	0	0	0	0	0	0	0	0	0	0	0	0	0	0	0	0	0	0	0	0	0	0	-0.00510902	0.577742	0	-1.13487	0.00510902	0.546994	0	0	0	0	0	0	0	0	0	0	0	0	0	0	0	0	0	0
	Gov Eq 1 (14)	0	0	0	0	0	0	0	0	0	0	0	0	0	0	0	0	0	0	0	0	0	0	0	0	0	0	0.0100603	0.00495143	-0.0198013	0.000314898	0.00974541	-0.00495143	0	0	0	0	0	0	0	0	0	0	0	0	0	0	0	0
	Gov Eq 2 (14)	0	0	0	0	0	0	0	0	0	0	0	0	0	0	0	0	0	0	0	0	0	0	0	0	0	0	-0.00495143	0.546994	0	-1.07407	0.00495143	0.517251	0	0	0	0	0	0	0	0	0	0	0	0	0	0	0	0
	Gov Eq 1 (15)	0	0	0	0	0	0	0	0	0	0	0	0	0	0	0	0	0	0	0	0	0	0	0	0	0	0	0	0	0.00974538	0.00479418	-0.0191724	0.000314037	0.00943134	-0.00479418	0	0	0	0	0	0	0	0	0	0	0	0	0	0
	Gov Eq 2 (15)	0	0	0	0	0	0	0	0	0	0	0	0	0	0	0	0	0	0	0	0	0	0	0	0	0	0	0	0	-0.00479418	0.517251	0	-1.01528	0.00479418	0.488515	0	0	0	0	0	0	0	0	0	0	0	0	0	0
	Gov Eq 1 (16)	0	0	0	0	0	0	0	0	0	0	0	0	0	0	0	0	0	0	0	0	0	0	0	0	0	0	0	0	0	0	0.00943131	0.00463745	-0.0185457	0.000312829	0.00911848	-0.00463745	0	0	0	0	0	0	0	0	0	0	0	0
	Gov Eq 2 (16)	0	0	0	0	0	0	0	0	0	0	0	0	0	0	0	0	0	0	0	0	0	0	0	0	0	0	0	0	0	0	-0.00463745	0.488515	0	-0.958508	0.00463745	0.460786	0	0	0	0	0	0	0	0	0	0	0	0
	Gov Eq 1 (17)	0	0	0	0	0	0	0	0	0	0	0	0	0	0	0	0	0	0	0	0	0	0	0	0	0	0	0	0	0	0	0	0	0.00911846	0.00448141	-0.0179216	0.000311283	0.00880717	-0.00448141	0	0	0	0	0	0	0	0	0	0
	Gov Eq 2 (17)	0	0	0	0	0	0	0	0	0	0	0	0	0	0	0	0	0	0	0	0	0	0	0	0	0	0	0	0	0	0	0	0	-0.00448141	0.460786	0	-0.903746	0.00448141	0.434061	0	0	0	0	0	0	0	0	0	0
	Gov Eq 1 (18)	0	0	0	0	0	0	0	0	0	0	0	0	0	0	0	0	0	0	0	0	0	0	0	0	0	0	0	0	0	0	0	0	0	0	0.00880715	0.00432622	-0.017301	0.000309411	0.00849774	-0.00432622	0	0	0	0	0	0	0	0
	Gov Eq 2 (18)	0	0	0	0	0	0	0	0	0	0	0	0	0	0	0	0	0	0	0	0	0	0	0	0	0	0	0	0	0	0	0	0	0	0	-0.00432622	0.434062	0	-0.85099	0.00432622	0.408336	0	0	0	0	0	0	0	0
	Gov Eq 1 (19)	0	0	0	0	0	0	0	0	0	0	0	0	0	0	0	0	0	0	0	0	0	0	0	0	0	0	0	0	0	0	0	0	0	0	0	0	0.00849771	0.00417205	-0.0166844	0.000307221	0.00819049	-0.00417205	0	0	0	0	0	0
	Gov Eq 2 (19)	0	0	0	0	0	0	0	0	0	0	0	0	0	0	0	0	0	0	0	0	0	0	0	0	0	0	0	0	0	0	0	0	0	0	0	0	-0.00417205	0.408337	0	-0.800229	0.00417205	0.383605	0	0	0	0	0	0
	Gov Eq 1 (20)	0	0	0	0	0	0	0	0	0	0	0	0	0	0	0	0	0	0	0	0	0	0	0	0	0	0	0	0	0	0	0	0	0	0	0	0	0	0	0.00819046	0.00401905	-0.0160726	0.000304725	0.00788574	-0.00401905	0	0	0	0
	Gov Eq 2 (20)	0	0	0	0	0	0	0	0	0	0	0	0	0	0	0	0	0	0	0	0	0	0	0	0	0	0	0	0	0	0	0	0	0	0	0	0	0	0	-0.00401905	0.383605	0	-0.751448	0.00401905	0.359858	0	0	0	0
	Gov Eq 1 (21)	0	0	0	0	0	0	0	0	0	0	0	0	0	0	0	0	0	0	0	0	0	0	0	0	0	0	0	0	0	0	0	0	0	0	0	0	0	0	0	0	0.00788571	0.00386737	-0.015466	0.000301933	0.00758378	-0.00386737	0	0
	Gov Eq 2 (21)	0	0	0	0	0	0	0	0	0	0	0	0	0	0	0	0	0	0	0	0	0	0	0	0	0	0	0	0	0	0	0	0	0	0	0	0	0	0	0	0	-0.00386737	0.359859	0	-0.704628	0.00386737	0.337085	0	0
	Gov Eq 1 (22)	0	0	0	0	0	0	0	0	0	0	0	0	0	0	0	0	0	0	0	0	0	0	0	0	0	0	0	0	0	0	0	0	0	0	0	0	0	0	0	0	0	0	0.00758376	0.00371716	-0.0148653	0.000298855	0.0072849	-0.00371716
	Gov Eq 2 (22)	0	0	0	0	0	0	0	0	0	0	0	0	0	0	0	0	0	0	0	0	0	0	0	0	0	0	0	0	0	0	0	0	0	0	0	0	0	0	0	0	0	0	-0.00371716	0.337086	0	-0.659749	0.00371716	0.315276
	Gov Eq 1 (23)	0	0	0	0	0	0	0	0	0	0	0	0	0	0	0	0	0	0	0	0	0	0	0	0	0	0	0	0	0	0	0	0	0	0	0	0	0	0	0	0	0	0	0	0	0.00728488	0.00356856	-0.014271	0.0002955
	Gov Eq 2 (23)	0	0	0	0	0	0	0	0	0	0	0	0	0	0	0	0	0	0	0	0	0	0	0	0	0	0	0	0	0	0	0	0	0	0	0	0	0	0	0	0	0	0	0	0	-0.00356856	0.315277	0	-0.616786
	Gov Eq 1 (24)	0	0	0	0	0	0	0	0	0	0	0	0	0	0	0	0	0	0	0	0	0	0	0	0	0	0	0	0	0	0	0	0	0	0	0	0	0	0	0	0	0	0	0	0	0	0	0.00698936	0.00342171
	Gov Eq 2 (24)	0	0	0	0	0	0	0	0	0	0	0	0	0	0	0	0	0	0	0	0	0	0	0	0	0	0	0	0	0	0	0	0	0	0	0	0	0	0	0	0	0	0	0	0	0	0	-0.00342171	0.294418
	Gov Eq 1 (25)	0	0	0	0	0	0	0	0	0	0	0	0	0	0	0	0	0	0	0	0	0	0	0	0	0	0	0	0	0	0	0	0	0	0	0	0	0	0	0	0	0	0	0	0	0	0	0	0
	Gov Eq 2 (25)	0	0	0	0	0	0	0	0	0	0	0	0	0	0	0	0	0	0	0	0	0	0	0	0	0	0	0	0	0	0	0	0	0	0	0	0	0	0	0	0	0	0	0	0	0	0	0	0
	Gov Eq 1 (26)	0	0	0	0	0	0	0	0	0	0	0	0	0	0	0	0	0	0	0	0	0	0	0	0	0	0	0	0	0	0	0	0	0	0	0	0	0	0	0	0	0	0	0	0	0	0	0	0
	Gov Eq 2 (26)	0	0	0	0	0	0	0	0	0	0	0	0	0	0	0	0	0	0	0	0	0	0	0	0	0	0	0	0	0	0	0	0	0	0	0	0	0	0	0	0	0	0	0	0	0	0	0	0
	Gov Eq 1 (27)	0	0	0	0	0	0	0	0	0	0	0	0	0	0	0	0	0	0	0	0	0	0	0	0	0	0	0	0	0	0	0	0	0	0	0	0	0	0	0	0	0	0	0	0	0	0	0	0
	Gov Eq 2 (27)	0	0	0	0	0	0	0	0	0	0	0	0	0	0	0	0	0	0	0	0	0	0	0	0	0	0	0	0	0	0	0	0	0	0	0	0	0	0	0	0	0	0	0	0	0	0	0	0
	Gov Eq 1 (28)	0	0	0	0	0	0	0	0	0	0	0	0	0	0	0	0	0	0	0	0	0	0	0	0	0	0	0	0	0	0	0	0	0	0	0	0	0	0	0	0	0	0	0	0	0	0	0	0
	Gov Eq 2 (28)	0	0	0	0	0	0	0	0	0	0	0	0	0	0	0	0	0	0	0	0	0	0	0	0	0	0	0	0	0	0	0	0	0	0	0	0	0	0	0	0	0	0	0	0	0	0	0	0
	Gov Eq 1 (29)	0	0	0	0	0	0	0	0	0	0	0	0	0	0	0	0	0	0	0	0	0	0	0	0	0	0	0	0	0	0	0	0	0	0	0	0	0	0	0	0	0	0	0	0	0	0	0	0
	Gov Eq 2 (29)	0	0	0	0	0	0	0	0	0	0	0	0	0	0	0	0	0	0	0	0	0	0	0	0	0	0	0	0	0	0	0	0	0	0	0	0	0	0	0	0	0	0	0	0	0	0	0	0
	Gov Eq 1 (30)	0	0	0	0	0	0	0	0	0	0	0	0	0	0	0	0	0	0	0	0	0	0	0	0	0	0	0	0	0	0	0	0	0	0	0	0	0	0	0	0	0	0	0	0	0	0	0	0
	Gov Eq 2 (30)	0	0	0	0	0	0	0	0	0	0	0	0	0	0	0	0	0	0	0	0	0	0	0	0	0	0	0	0	0	0	0	0	0	0	0	0	0	0	0	0	0	0	0	0	0	0	0	0
	Gov Eq 1 (31)	0	0	0	0	0	0	0	0	0	0	0	0	0	0	0	0	0	0	0	0	0	0	0	0	0	0	0	0	0	0	0	0	0	0	0	0	0	0	0	0	0	0	0	0	0	0	0	0
	Gov Eq 2 (31)	0	0	0	0	0	0	0	0	0	0	0	0	0	0	0	0	0	0	0	0	0	0	0	0	0	0	0	0	0	0	0	0	0	0	0	0	0	0	0	0	0	0	0	0	0	0	0	0
	Gov Eq 1 (32)	0	0	0	0	0	0	0	0	0	0	0	0	0	0	0	0	0	0	0	0	0	0	0	0	0	0	0	0	0	0	0	0	0	0	0	0	0	0	0	0	0	0	0	0	0	0	0	0
	Gov Eq 2 (32)	0	0	0	0	0	0	0	0	0	0	0	0	0	0	0	0	0	0	0	0	0	0	0	0	0	0	0	0	0	0	0	0	0	0	0	0	0	0	0	0	0	0	0	0	0	0	0	0
	Gov Eq 1 (33)	0	0	0	0	0	0	0	0	0	0	0	0	0	0	0	0	0	0	0	0	0	0	0	0	0	0	0	0	0	0	0	0	0	0	0	0	0	0	0	0	0	0	0	0	0	0	0	0
	Gov Eq 2 (33)	0	0	0	0	0	0	0	0	0	0	0	0	0	0	0	0	0	0	0	0	0	0	0	0	0	0	0	0	0	0	0	0	0	0	0	0	0	0	0	0	0	0	0	0	0	0	0	0
	Gov Eq 1 (34)	0	0	0	0	0	0	0	0	0	0	0	0	0	0	0	0	0	0	0	0	0	0	0	0	0	0	0	0	0	0	0	0	0	0	0	0	0	0	0	0	0	0	0	0	0	0	0	0
	Gov Eq 2 (34)	0	0	0	0	0	0	0	0	0	0	0	0	0	0	0	0	0	0	0	0	0	0	0	0	0	0	0	0	0	0	0	0	0	0	0	0	0	0	0	0	0	0	0	0	0	0	0	0
	Gov Eq 1 (35)	0	0	0	0	0	0	0	0	0	0	0	0	0	0	0	0	0	0	0	0	0	0	0	0	0	0	0	0	0	0	0	0	0	0	0	0	0	0	0	0	0	0	0	0	0	0	0	0
	Gov Eq 2 (35)	0	0	0	0	0	0	0	0	0	0	0	0	0	0	0	0	0	0	0	0	0	0	0	0	0	0	0	0	0	0	0	0	0	0	0	0	0	0	0	0	0	0	0	0	0	0	0	0
	Gov Eq 1 (36)	0	0	0	0	0	0	0	0	0	0	0	0	0	0	0	0	0	0	0	0	0	0	0	0	0	0	0	0	0	0	0	0	0	0	0	0	0	0	0	0	0	0	0	0	0	0	0	0
	Gov Eq 2 (36)	0	0	0	0	0	0	0	0	0	0	0	0	0	0	0	0	0	0	0	0	0	0	0	0	0	0	0	0	0	0	0	0	0	0	0	0	0	0	0	0	0	0	0	0	0	0	0	0
	Gov Eq 1 (37)	0	0	0	0	0	0	0	0	0	0	0	0	0	0	0	0	0	0	0	0	0	0	0	0	0	0	0	0	0	0	0	0	0	0	0	0	0	0	0	0	0	0	0	0	0	0	0	0
	Gov Eq 2 (37)	0	0	0	0	0	0	0	0	0	0	0	0	0	0	0	0	0	0	0	0	0	0	0	0	0	0	0	0	0	0	0	0	0	0	0	0	0	0	0	0	0	0	0	0	0	0	0	0
	Gov Eq 1 (38)	0	0	0	0	0	0	0	0	0	0	0	0	0	0	0	0	0	0	0	0	0	0	0	0	0	0	0	0	0	0	0	0	0	0	0	0	0	0	0	0	0	0	0	0	0	0	0	0
	Gov Eq 2 (38)	0	0	0	0	0	0	0	0	0	0	0	0	0	0	0	0	0	0	0	0	0	0	0	0	0	0	0	0	0	0	0	0	0	0	0	0	0	0	0	0	0	0	0	0	0	0	0	0
	Gov Eq 1 (39)	0	0	0	0	0	0	0	0	0	0	0	0	0	0	0	0	0	0	0	0	0	0	0	0	0	0	0	0	0	0	0	0	0	0	0	0	0	0	0	0	0	0	0	0	0	0	0	0
	Gov Eq 2 (39)	0	0	0	0	0	0	0	0	0	0	0	0	0	0	0	0	0	0	0	0	0	0	0	0	0	0	0	0	0	0	0	0	0	0	0	0	0	0	0	0	0	0	0	0	0	0	0	0
	Gov Eq 1 (40)	0	0	0	0	0	0	0	0	0	0	0	0	0	0	0	0	0	0	0	0	0	0	0	0	0	0	0	0	0	0	0	0	0	0	0	0	0	0	0	0	0	0	0	0	0	0	0	0
	Gov Eq 2 (40)	0	0	0	0	0	0	0	0	0	0	0	0	0	0	0	0	0	0	0	0	0	0	0	0	0	0	0	0	0	0	0	0	0	0	0	0	0	0	0	0	0	0	0	0	0	0	0	0
	Gov Eq 1 (41)	0	0	0	0	0	0	0	0	0	0	0	0	0	0	0	0	0	0	0	0	0	0	0	0	0	0	0	0	0	0	0	0	0	0	0	0	0	0	0	0	0	0	0	0	0	0	0	0
	Gov Eq 2 (41)	0	0	0	0	0	0	0	0	0	0	0	0	0	0	0	0	0	0	0	0	0	0	0	0	0	0	0	0	0	0	0	0	0	0	0	0	0	0	0	0	0	0	0	0	0	0	0	0
	Gov Eq 1 (42)	0	0	0	0	0	0	0	0	0	0	0	0	0	0	0	0	0	0	0	0	0	0	0	0	0	0	0	0	0	0	0	0	0	0	0	0	0	0	0	0	0	0	0	0	0	0	0	0
	Gov Eq 2 (42)	0	0	0	0	0	0	0	0	0	0	0	0	0	0	0	0	0	0	0	0	0	0	0	0	0	0	0	0	0	0	0	0	0	0	0	0	0	0	0	0	0	0	0	0	0	0	0	0
	Gov Eq 1 (43)	0	0	0	0	0	0	0	0	0	0	0	0	0	0	0	0	0	0	0	0	0	0	0	0	0	0	0	0	0	0	0	0	0	0	0	0	0	0	0	0	0	0	0	0	0	0	0	0
	Gov Eq 2 (43)	0	0	0	0	0	0	0	0	0	0	0	0	0	0	0	0	0	0	0	0	0	0	0	0	0	0	0	0	0	0	0	0	0	0	0	0	0	0	0	0	0	0	0	0	0	0	0	0
	Gov Eq 1 (44)	0	0	0	0	0	0	0	0	0	0	0	0	0	0	0	0	0	0	0	0	0	0	0	0	0	0	0	0	0	0	0	0	0	0	0	0	0	0	0	0	0	0	0	0	0	0	0	0
	Gov Eq 2 (44)	0	0	0	0	0	0	0	0	0	0	0	0	0	0	0	0	0	0	0	0	0	0	0	0	0	0	0	0	0	0	0	0	0	0	0	0	0	0	0	0	0	0	0	0	0	0	0	0
	Gov Eq 1 (45)	0	0	0	0	0	0	0	0	0	0	0	0	0	0	0	0	0	0	0	0	0	0	0	0	0	0	0	0	0	0	0	0	0	0	0	0	0	0	0	0	0	0	0	0	0	0	0	0
	Gov Eq 2 (45)	0	0	0	0	0	0	0	0	0	0	0	0	0	0	0	0	0	0	0	0	0	0	0	0	0	0	0	0	0	0	0	0	0	0	0	0	0	0	0	0	0	0	0	0	0	0	0	0
	Gov Eq 1 (46)	0	0	0	0	0	0	0	0	0	0	0	0	0	0	0	0	0	0	0	0	0	0	0	0	0	0	0	0	0	0	0	0	0	0	0	0	0	0	0	0	0	0	0	0	0	0	0	0
	Gov Eq 2 (46)	0	0	0	0	0	0	0	0	0	0	0	0	0	0	0	0	0	0	0	0	0	0	0	0	0	0	0	0	0	0	0	0	0	0	0	0	0	0	0	0	0	0	0	0	0	0	0	0
	Gov Eq 1 (47)	0	0	0	0	0	0	0	0	0	0	0	0	0	0	0	0	0	0	0	0	0	0	0	0	0	0	0	0	0	0	0	0	0	0	0	0	0	0	0	0	0	0	0	0	0	0	0	0
	Gov Eq 2 (47)	0	0	0	0	0	0	0	0	0	0	0	0	0	0	0	0	0	0	0	0	0	0	0	0	0	0	0	0	0	0	0	0	0	0	0	0	0	0	0	0	0	0	0	0	0	0	0	0
	Gov Eq 1 (48)	0	0	0	0	0	0	0	0	0	0	0	0	0	0	0	0	0	0	0	0	0	0	0	0	0	0	0	0	0	0	0	0	0	0	0	0	0	0	0	0	0	0	0	0	0	0	0	0
	Gov Eq 2 (48)	0	0	0	0	0	0	0	0	0	0	0	0	0	0	0	0	0	0	0	0	0	0	0	0	0	0	0	0	0	0	0	0	0	0	0	0	0	0	0	0	0	0	0	0	0	0	0	0
	Gov Eq 1 (49)	0	0	0	0	0	0	0	0	0	0	0	0	0	0	0	0	0	0	0	0	0	0	0	0	0	0	0	0	0	0	0	0	0	0	0	0	0	0	0	0	0	0	0	0	0	0	0	0
	Gov Eq 2 (49)	0	0	0	0	0	0	0	0	0	0	0	0	0	0	0	0	0	0	0	0	0	0	0	0	0	0	0	0	0	0	0	0	0	0	0	0	0	0	0	0	0	0	0	0	0	0	0	0
	Bo Co 1 (1)	0	0	1	0	0	0	0	0	0	0	0	0	0	0	0	0	0	0	0	0	0	0	0	0	0	0	0	0	0	0	0	0	0	0	0	0	0	0	0	0	0	0	0	0	0	0	0	0
	Bo Co 2 (1)	0	1	0	0	0	-1	0	0	0	0	0	0	0	0	0	0	0	0	0	0	0	0	0	0	0	0	0	0	0	0	0	0	0	0	0	0	0	0	0	0	0	0	0	0	0	0	0	0
	Bo Co 1 (49)	0	0	0	0	0	0	0	0	0	0	0	0	0	0	0	0	0	0	0	0	0	0	0	0	0	0	0	0	0	0	0	0	0	0	0	0	0	0	0	0	0	0	0	0	0	0	0	0
	Bo Co 2 (49)	0	0	0	0	0	0	0	0	0	0	0	0	0	0	0	0	0	0	0	0	0	0	0	0	0	0	0	0	0	0	0	0	0	0	0	0	0	0	0	0	0	0	0	0	0	0	0	0
[truncated: 54 more columns]

## Sheet: Fixed-fixed beam
		Vibration analysis of a tapered fixed-fixed Timoshenko beam
										Governing equations
	W-F FDM approximation
		Nine-point grid
	n =	8		n =	0.3
		0.125		k =	0.833333
		0.0312		Er = E0 =	200	Gpa
	kRIr =	0.01		E1 =	70	Gpa
				rr = r0 =	5700	kg/m3
		0.500801		r1 =	2702	kg/m3
		12.092				Determinant =	-8.1197e-05
					PSM	Shahba et al.	9 pt
		0.0356973		2.28462	11.3145	11.3199	12.092
		0.5
			Nodes	1		2		3		4		5		6		7		8		9
				0		0.125		0.25		0.375		0.5		0.625		0.75		0.875		1
				1		0.772476		0.586182		0.435806		0.316406		0.223404		0.152588		0.100113		0.0625
				1		0.878906		0.765625		0.660156		0.5625		0.472656		0.390625		0.316406		0.25
				1		0.991782		0.967127		0.926036		0.868509		0.794545		0.704145		0.597308		0.474035
				1		0.989844		0.959375		0.908594		0.8375		0.746094		0.634375		0.502344		0.35
				-0.125		-0.13385		-0.136035		-0.132507		-0.124219		-0.112122		-0.097168		-0.0803101		-0.0625
				-0.25		-0.219592		-0.18449		-0.148394		-0.114038		-0.0833005		-0.0573158		-0.0365864		-0.0210938
		W0	hkF0	W1	hkF1	W2	hkF2	W3	hkF3	W4	hkF4	W5	hkF5	W6	hkF6	W7	hkF7	W8	hkF8	W9	hkF9	W10	hkF10
	Gov Eq 1 (1)	0.532101	0.250401	-0.965905	0.0626002	0.469501	-0.250401	0	0	0	0	0	0	0	0	0	0	0	0	0	0	0	0
	Gov Eq 2 (1)	-0.250401	1.125	0	-2.47796	0.250401	0.875	0	0	0	0	0	0	0	0	0	0	0	0	0	0	0	0
	Gov Eq 1 (2)	0	0	0.469203	0.217844	-0.840257	0.0670323	0.402171	-0.217844	0	0	0	0	0	0	0	0	0	0	0	0	0	0
	Gov Eq 2 (2)	0	0	-0.217844	0.874427	0	-1.94745	0.217844	0.654835	0	0	0	0	0	0	0	0	0	0	0	0	0	0
	Gov Eq 1 (3)	0	0	0	0	0.401913	0.183925	-0.709266	0.0681266	0.333786	-0.183925	0	0	0	0	0	0	0	0	0	0	0	0
	Gov Eq 2 (3)	0	0	0	0	-0.183925	0.654613	0	-1.47963	0.183925	0.470123	0	0	0	0	0	0	0	0	0	0	0	0
	Gov Eq 1 (4)	0	0	0	0	0	0	0.333567	0.150194	-0.578952	0.0663598	0.267208	-0.150194	0	0	0	0	0	0	0	0	0	0
	Gov Eq 2 (4)	0	0	0	0	0	0	-0.150194	0.470168	0	-1.08311	0.150194	0.321774	0	0	0	0	0	0	0	0	0	0
	Gov Eq 1 (5)	0	0	0	0	0	0	0	0	0.267029	0.117962	-0.454409	0.0622089	0.20482	-0.117962	0	0	0	0	0	0	0	0
	Gov Eq 2 (5)	0	0	0	0	0	0	0	0	-0.117962	0.322009	0	-0.759627	0.117962	0.207971	0	0	0	0	0	0	0	0
	Gov Eq 1 (6)	0	0	0	0	0	0	0	0	0	0	0.204681	0.0883028	-0.339805	0.0561506	0.14853	-0.0883028	0	0	0	0	0	0
	Gov Eq 2 (6)	0	0	0	0	0	0	0	0	0	0	-0.0883028	0.208331	0	-0.505911	0.0883028	0.12503	0	0	0	0	0	0
	Gov Eq 1 (7)	0	0	0	0	0	0	0	0	0	0	0	0	0.148431	0.06205	-0.238381	0.0486618	0.099769	-0.06205	0	0	0	0
	Gov Eq 2 (7)	0	0	0	0	0	0	0	0	0	0	0	0	-0.06205	0.125456	0	-0.315241	0.06205	0.06814	0	0	0	0
	Gov Eq 1 (8)	0	0	0	0	0	0	0	0	0	0	0	0	0	0	0.0997094	0.0397999	-0.152453	0.0402194	0.05949	-0.0397999	0	0
	Gov Eq 2 (8)	0	0	0	0	0	0	0	0	0	0	0	0	0	0	-0.0397999	0.0685843	0	-0.178816	0.0397999	0.0319979	0	0
	Gov Eq 1 (9)	0	0	0	0	0	0	0	0	0	0	0	0	0	0	0	0	0.0594702	0.0219101	-0.0834098	0.0313001	0.0281701	-0.0219101
	Gov Eq 2 (9)	0	0	0	0	0	0	0	0	0	0	0	0	0	0	0	0	-0.0219101	0.0324219	0	-0.0868932	0.0219101	0.0113281
	Bo Co 1 (1)	0	0	1	0	0	0	0	0	0	0	0	0	0	0	0	0	0	0	0	0	0	0
	Bo Co 2 (1)	0	0	0	1	0	0	0	0	0	0	0	0	0	0	0	0	0	0	0	0	0	0
	Bo Co 1 (9)	0	0	0	0	0	0	0	0	0	0	0	0	0	0	0	0	0	0	1	0	0	0
	Bo Co 2 (9)	0	0	0	0	0	0	0	0	0	0	0	0	0	0	0	0	0	0	0	1	0	0
										Governing equations
	W-F FDM approximation
		17-point grid
	n =	16
		0.0625
		0.0312		Er = E0 =	200	Gpa
	kRIr =	0.01		E1 =	70	Gpa
				rr = r0 =	5700	kg/m3
		0.1252		r1 =	2702	kg/m3
		11.5094				Determinant =	1.0706e-08
					PSM	Shahba et al.	9 pt	17 pt
		0.00202127		0.517446	11.3145	11.3199	12.092	11.5094
		0.5
			Nodes	1		2		3		4		5		6		7		8		9		10		11		12		13		14		15		16		17
				0		0.0625		0.125		0.1875		0.25		0.3125		0.375		0.4375		0.5		0.5625		0.625		0.6875		0.75		0.8125		0.875		0.9375		1
				1		0.880738		0.772476		0.674516		0.586182		0.506822		0.435806		0.372529		0.316406		0.266877		0.223404		0.185472		0.152588		0.124284		0.100113		0.0796518		0.0625
				1		0.938477		0.878906		0.821289		0.765625		0.711914		0.660156		0.610352		0.5625		0.516602		0.472656		0.430664		0.390625		0.352539		0.316406		0.282227		0.25
				1		0.997945		0.991782		0.981509		0.967127		0.948636		0.926036		0.899327		0.868509		0.833581		0.794545		0.751399		0.704145		0.652781		0.597308		0.537726		0.474035
				1		0.997461		0.989844		0.977148		0.959375		0.936523		0.908594		0.875586		0.8375		0.794336		0.746094		0.692773		0.634375		0.570898		0.502344		0.428711		0.35
				-0.0625		-0.0651588		-0.066925		-0.0678581		-0.0680176		-0.0674629		-0.0662537		-0.0644493		-0.0621094		-0.0592934		-0.0560608		-0.0524712		-0.048584		-0.0444588		-0.040155		-0.0357323		-0.03125
				-0.125		-0.117828		-0.109796		-0.101186		-0.0922451		-0.0831871		-0.0741971		-0.0654312		-0.057019		-0.049065		-0.0416502		-0.0348346		-0.0286579		-0.0231422		-0.0182932		-0.014102		-0.0105469
		W0	hkF0	W1	hkF1	W2	hkF2	W3	hkF3	W4	hkF4	W5	hkF5	W6	hkF6	W7	hkF7	W8	hkF8	W9	hkF9	W10	hkF10	W11	hkF11	W12	hkF12	W13	hkF13	W14	hkF14	W15	hkF15	W16	hkF16	W17	hkF17	W18	hkF18
	Gov Eq 1 (1)	0.129113	0.0626002	-0.248379	0.00782502	0.121288	-0.0626002	0	0	0	0	0	0	0	0	0	0	0	0	0	0	0	0	0	0	0	0	0	0	0	0	0	0	0	0	0	0	0	0
	Gov Eq 2 (1)	-0.0626002	1.0625	0	-2.12003	0.0626002	0.9375	0	0	0	0	0	0	0	0	0	0	0	0	0	0	0	0	0	0	0	0	0	0	0	0	0	0	0	0	0	0	0	0
	Gov Eq 1 (2)	0	0	0.121278	0.0585996	-0.232505	0.00815791	0.11312	-0.0585996	0	0	0	0	0	0	0	0	0	0	0	0	0	0	0	0	0	0	0	0	0	0	0	0	0	0	0	0	0	0
	Gov Eq 2 (2)	0	0	-0.0585996	0.937416	0	-1.86966	0.0585996	0.819588	0	0	0	0	0	0	0	0	0	0	0	0	0	0	0	0	0	0	0	0	0	0	0	0	0	0	0	0	0	0
	Gov Eq 1 (3)	0	0	0	0	0.113111	0.0544609	-0.216082	0.00837904	0.104732	-0.0544609	0	0	0	0	0	0	0	0	0	0	0	0	0	0	0	0	0	0	0	0	0	0	0	0	0	0	0	0
	Gov Eq 2 (3)	0	0	0	0	-0.0544609	0.819529	0	-1.63422	0.0544609	0.709733	0	0	0	0	0	0	0	0	0	0	0	0	0	0	0	0	0	0	0	0	0	0	0	0	0	0	0	0
	Gov Eq 1 (4)	0	0	0	0	0	0	0.104724	0.050238	-0.199323	0.00849586	0.096228	-0.050238	0	0	0	0	0	0	0	0	0	0	0	0	0	0	0	0	0	0	0	0	0	0	0	0	0	0
	Gov Eq 2 (4)	0	0	0	0	0	0	-0.050238	0.709695	0	-1.41525	0.050238	0.608509	0	0	0	0	0	0	0	0	0	0	0	0	0	0	0	0	0	0	0	0	0	0	0	0	0	0
	Gov Eq 1 (5)	0	0	0	0	0	0	0	0	0.0962202	0.0459812	-0.182428	0.00851582	0.0877044	-0.0459812	0	0	0	0	0	0	0	0	0	0	0	0	0	0	0	0	0	0	0	0	0	0	0	0
	Gov Eq 2 (5)	0	0	0	0	0	0	0	0	-0.0459812	0.608491	0	-1.21376	0.0459812	0.516245	0	0	0	0	0	0	0	0	0	0	0	0	0	0	0	0	0	0	0	0	0	0	0	0
	Gov Eq 1 (6)	0	0	0	0	0	0	0	0	0	0	0.0876973	0.041737	-0.165583	0.00844638	0.0792509	-0.041737	0	0	0	0	0	0	0	0	0	0	0	0	0	0	0	0	0	0	0	0	0	0
	Gov Eq 2 (6)	0	0	0	0	0	0	0	0	0	0	-0.041737	0.516244	0	-1.03029	0.041737	0.433057	0	0	0	0	0	0	0	0	0	0	0	0	0	0	0	0	0	0	0	0	0	0
	Gov Eq 1 (7)	0	0	0	0	0	0	0	0	0	0	0	0	0.0792444	0.0375484	-0.148958	0.00829498	0.0709494	-0.0375484	0	0	0	0	0	0	0	0	0	0	0	0	0	0	0	0	0	0	0	0
	Gov Eq 2 (7)	0	0	0	0	0	0	0	0	0	0	0	0	-0.0375484	0.433069	0	-0.86495	0.0375484	0.358872	0	0	0	0	0	0	0	0	0	0	0	0	0	0	0	0	0	0	0	0
	Gov Eq 1 (8)	0	0	0	0	0	0	0	0	0	0	0	0	0	0	0.0709435	0.0334545	-0.132708	0.00806907	0.0628744	-0.0334545	0	0	0	0	0	0	0	0	0	0	0	0	0	0	0	0	0	0
	Gov Eq 2 (8)	0	0	0	0	0	0	0	0	0	0	0	0	0	0	-0.0334545	0.358897	0	-0.717538	0.0334545	0.293466	0	0	0	0	0	0	0	0	0	0	0	0	0	0	0	0	0	0
	Gov Eq 1 (9)	0	0	0	0	0	0	0	0	0	0	0	0	0	0	0	0	0.0628691	0.0294905	-0.116975	0.00777611	0.055093	-0.0294905	0	0	0	0	0	0	0	0	0	0	0	0	0	0	0	0
	Gov Eq 2 (9)	0	0	0	0	0	0	0	0	0	0	0	0	0	0	0	0	-0.0294905	0.2935	0	-0.58754	0.0294905	0.236481	0	0	0	0	0	0	0	0	0	0	0	0	0	0	0	0
	Gov Eq 1 (10)	0	0	0	0	0	0	0	0	0	0	0	0	0	0	0	0	0	0	0.0550884	0.0256883	-0.101883	0.00742355	0.0476648	-0.0256883	0	0	0	0	0	0	0	0	0	0	0	0	0	0
	Gov Eq 2 (10)	0	0	0	0	0	0	0	0	0	0	0	0	0	0	0	0	0	0	-0.0256883	0.236523	0	-0.474206	0.0256883	0.187458	0	0	0	0	0	0	0	0	0	0	0	0	0	0
	Gov Eq 1 (11)	0	0	0	0	0	0	0	0	0	0	0	0	0	0	0	0	0	0	0	0	0.0476608	0.0220757	-0.0875437	0.00701883	0.040642	-0.0220757	0	0	0	0	0	0	0	0	0	0	0	0
	Gov Eq 2 (11)	0	0	0	0	0	0	0	0	0	0	0	0	0	0	0	0	0	0	0	0	-0.0220757	0.187505	0	-0.376593	0.0220757	0.145855	0	0	0	0	0	0	0	0	0	0	0	0
	Gov Eq 1 (12)	0	0	0	0	0	0	0	0	0	0	0	0	0	0	0	0	0	0	0	0	0	0	0.0406385	0.0186769	-0.0740536	0.00656941	0.0340691	-0.0186769	0	0	0	0	0	0	0	0	0	0
	Gov Eq 2 (12)	0	0	0	0	0	0	0	0	0	0	0	0	0	0	0	0	0	0	0	0	0	0	-0.0186769	0.145907	0	-0.293612	0.0186769	0.111072	0	0	0	0	0	0	0	0	0	0
	Gov Eq 1 (13)	0	0	0	0	0	0	0	0	0	0	0	0	0	0	0	0	0	0	0	0	0	0	0	0	0.0340663	0.0155125	-0.061494	0.00608273	0.0279836	-0.0155125	0	0	0	0	0	0	0	0
	Gov Eq 2 (13)	0	0	0	0	0	0	0	0	0	0	0	0	0	0	0	0	0	0	0	0	0	0	0	0	-0.0155125	0.111127	0	-0.224065	0.0155125	0.082469	0	0	0	0	0	0	0	0
	Gov Eq 1 (14)	0	0	0	0	0	0	0	0	0	0	0	0	0	0	0	0	0	0	0	0	0	0	0	0	0	0	0.0279814	0.0125992	-0.0499315	0.00556625	0.0224152	-0.0125992	0	0	0	0	0	0
	Gov Eq 2 (14)	0	0	0	0	0	0	0	0	0	0	0	0	0	0	0	0	0	0	0	0	0	0	0	0	0	0	-0.0125992	0.0825245	0	-0.166685	0.0125992	0.0593823	0	0	0	0	0	0
	Gov Eq 1 (15)	0	0	0	0	0	0	0	0	0	0	0	0	0	0	0	0	0	0	0	0	0	0	0	0	0	0	0	0	0.0224136	0.00994996	-0.0394179	0.00502742	0.0173862	-0.00994996	0	0	0	0
	Gov Eq 2 (15)	0	0	0	0	0	0	0	0	0	0	0	0	0	0	0	0	0	0	0	0	0	0	0	0	0	0	0	0	-0.00994996	0.0594377	0	-0.120173	0.00994996	0.0411445	0	0	0	0
	Gov Eq 1 (16)	0	0	0	0	0	0	0	0	0	0	0	0	0	0	0	0	0	0	0	0	0	0	0	0	0	0	0	0	0	0	0.0173853	0.00757422	-0.0299901	0.00447369	0.0129116	-0.00757422	0	0
	Gov Eq 2 (16)	0	0	0	0	0	0	0	0	0	0	0	0	0	0	0	0	0	0	0	0	0	0	0	0	0	0	0	0	0	0	-0.00757422	0.0411986	0	-0.083222	0.00757422	0.0270966	0	0
	Gov Eq 1 (17)	0	0	0	0	0	0	0	0	0	0	0	0	0	0	0	0	0	0	0	0	0	0	0	0	0	0	0	0	0	0	0	0	0.0129113	0.00547751	-0.0216705	0.00391251	0.00899877	-0.00547751
	Gov Eq 2 (17)	0	0	0	0	0	0	0	0	0	0	0	0	0	0	0	0	0	0	0	0	0	0	0	0	0	0	0	0	0	0	0	0	-0.00547751	0.0271484	0	-0.0545517	0.00547751	0.0166016
	Bo Co 1 (1)	0	0	1	0	0	0	0	0	0	0	0	0	0	0	0	0	0	0	0	0	0	0	0	0	0	0	0	0	0	0	0	0	0	0	0	0	0	0
	Bo Co 2 (1)	0	0	0	1	0	0	0	0	0	0	0	0	0	0	0	0	0	0	0	0	0	0	0	0	0	0	0	0	0	0	0	0	0	0	0	0	0	0
	Bo Co 1 (17)	0	0	0	0	0	0	0	0	0	0	0	0	0	0	0	0	0	0	0	0	0	0	0	0	0	0	0	0	0	0	0	0	0	0	1	0	0	0
	Bo Co 2 (17)	0	0	0	0	0	0	0	0	0	0	0	0	0	0	0	0	0	0	0	0	0	0	0	0	0	0	0	0	0	0	0	0	0	0	0	1	0	0
										Governing equations
	W-F FDM approximation
		33-point grid
	n =	32
		0.03125
		0.0312		Er = E0 =	200	Gpa
	kRIr =	0.01		E1 =	70	Gpa
				rr = r0 =	5700	kg/m3
		0.0313001		r1 =	2702	kg/m3
		11.36				Determinant =	-0.000518139
					PSM	Shahba et al.	9 pt	17 pt	33 pt
		0.000123072		0.126026	11.3145	11.3199	12.092	11.5094	11.36
		0.5
			Nodes	1		2		3		4		5		6		7		8		9		10		11		12		13		14		15		16		17		18		19		20		21		22		23
				0		0.03125		0.0625		0.09375		0.125		0.15625		0.1875		0.21875		0.25		0.28125		0.3125		0.34375		0.375		0.40625		0.4375		0.46875		0.5		0.53125		0.5625		0.59375		0.625		0.65625		0.6875
				1		0.93895		0.880738		0.825276		0.772476		0.722251		0.674516		0.629187		0.586182		0.54542		0.506822		0.470309		0.435806		0.403237		0.372529		0.343609		0.316406		0.290852		0.266877		0.244416		0.223404		0.203776		0.185472
				1		0.968994		0.938477		0.908447		0.878906		0.849854		0.821289		0.793213		0.765625		0.738525		0.711914		0.685791		0.660156		0.63501		0.610352		0.586182		0.5625		0.539307		0.516602		0.494385		0.472656		0.451416		0.430664
				1		0.999486		0.997945		0.995377		0.991782		0.987159		0.981509		0.974832		0.967127		0.958395		0.948636		0.93785		0.926036		0.913195		0.899327		0.884432		0.868509		0.851559		0.833581		0.814577		0.794545		0.773486		0.751399
				1		0.999365		0.997461		0.994287		0.989844		0.984131		0.977148		0.968896		0.959375		0.948584		0.936523		0.923193		0.908594		0.892725		0.875586		0.857178		0.8375		0.816553		0.794336		0.77085		0.746094		0.720068		0.692773
				-0.03125		-0.0319724		-0.0325794		-0.0330749		-0.0334625		-0.033746		-0.0339291		-0.0340154		-0.0340088		-0.0339129		-0.0337315		-0.0334682		-0.0331268		-0.0327111		-0.0322247		-0.0316713		-0.0310547		-0.0303786		-0.0296467		-0.0288627		-0.0280304		-0.0271534		-0.0262356
				-0.0625		-0.06077		-0.0589138		-0.0569505		-0.0548981		-0.0527737		-0.0505932		-0.0483715		-0.0461226		-0.0438592		-0.0415935		-0.0393366		-0.0370985		-0.0348887		-0.0327156		-0.0305869		-0.0285095		-0.0264896		-0.0245325		-0.022643		-0.0208251		-0.0190823		-0.0174173
		W0	hkF0	W1	hkF1	W2	hkF2	W3	hkF3	W4	hkF4	W5	hkF5	W6	hkF6	W7	hkF7	W8	hkF8	W9	hkF9	W10	hkF10	W11	hkF11	W12	hkF12	W13	hkF13	W14	hkF14	W15	hkF15	W16	hkF16	W17	hkF17	W18	hkF18	W19	hkF19	W20	hkF20	W21	hkF21	W22	hkF22	W23	hkF23
	Gov Eq 1 (1)	0.0317891	0.01565	-0.0624771	0.000978128	0.030811	-0.01565	0	0	0	0	0	0	0	0	0	0	0	0	0	0	0	0	0	0	0	0	0	0	0	0	0	0	0	0	0	0	0	0	0	0	0	0	0	0	0	0	0	0
	Gov Eq 2 (1)	-0.01565	1.03125	0	-2.03004	0.01565	0.96875	0	0	0	0	0	0	0	0	0	0	0	0	0	0	0	0	0	0	0	0	0	0	0	0	0	0	0	0	0	0	0	0	0	0	0	0	0	0	0	0	0	0
	Gov Eq 1 (2)	0	0	0.0308107	0.0151552	-0.0605015	0.00100074	0.02981	-0.0151552	0	0	0	0	0	0	0	0	0	0	0	0	0	0	0	0	0	0	0	0	0	0	0	0	0	0	0	0	0	0	0	0	0	0	0	0	0	0	0	0
	Gov Eq 2 (2)	0	0	-0.0151552	0.968739	0	-1.90583	0.0151552	0.907969	0	0	0	0	0	0	0	0	0	0	0	0	0	0	0	0	0	0	0	0	0	0	0	0	0	0	0	0	0	0	0	0	0	0	0	0	0	0	0	0
	Gov Eq 1 (3)	0	0	0	0	0.0298097	0.0146499	-0.0584844	0.00101974	0.0287899	-0.0146499	0	0	0	0	0	0	0	0	0	0	0	0	0	0	0	0	0	0	0	0	0	0	0	0	0	0	0	0	0	0	0	0	0	0	0	0	0	0
	Gov Eq 2 (3)	0	0	0	0	-0.0146499	0.907959	0	-1.7852	0.0146499	0.849045	0	0	0	0	0	0	0	0	0	0	0	0	0	0	0	0	0	0	0	0	0	0	0	0	0	0	0	0	0	0	0	0	0	0	0	0	0	0
	Gov Eq 1 (4)	0	0	0	0	0	0	0.0287897	0.014136	-0.0564328	0.00103525	0.0277544	-0.014136	0	0	0	0	0	0	0	0	0	0	0	0	0	0	0	0	0	0	0	0	0	0	0	0	0	0	0	0	0	0	0	0	0	0	0	0
	Gov Eq 2 (4)	0	0	0	0	0	0	-0.014136	0.849037	0	-1.66836	0.014136	0.792086	0	0	0	0	0	0	0	0	0	0	0	0	0	0	0	0	0	0	0	0	0	0	0	0	0	0	0	0	0	0	0	0	0	0	0	0
	Gov Eq 1 (5)	0	0	0	0	0	0	0	0	0.0277541	0.0136152	-0.0543536	0.00104738	0.0267067	-0.0136152	0	0	0	0	0	0	0	0	0	0	0	0	0	0	0	0	0	0	0	0	0	0	0	0	0	0	0	0	0	0	0	0	0	0
	Gov Eq 2 (5)	0	0	0	0	0	0	0	0	-0.0136152	0.79208	0	-1.55553	0.0136152	0.737182	0	0	0	0	0	0	0	0	0	0	0	0	0	0	0	0	0	0	0	0	0	0	0	0	0	0	0	0	0	0	0	0	0	0
	Gov Eq 1 (6)	0	0	0	0	0	0	0	0	0	0	0.0267065	0.0130892	-0.0522535	0.00105625	0.0256502	-0.0130892	0	0	0	0	0	0	0	0	0	0	0	0	0	0	0	0	0	0	0	0	0	0	0	0	0	0	0	0	0	0	0	0
	Gov Eq 2 (6)	0	0	0	0	0	0	0	0	0	0	-0.0130892	0.737176	0	-1.44686	0.0130892	0.684403	0	0	0	0	0	0	0	0	0	0	0	0	0	0	0	0	0	0	0	0	0	0	0	0	0	0	0	0	0	0	0	0
	Gov Eq 1 (7)	0	0	0	0	0	0	0	0	0	0	0	0	0.02565	0.0125595	-0.0501388	0.00106198	0.024588	-0.0125595	0	0	0	0	0	0	0	0	0	0	0	0	0	0	0	0	0	0	0	0	0	0	0	0	0	0	0	0	0	0
	Gov Eq 2 (7)	0	0	0	0	0	0	0	0	0	0	0	0	-0.0125595	0.684399	0	-1.34249	0.0125595	0.633805	0	0	0	0	0	0	0	0	0	0	0	0	0	0	0	0	0	0	0	0	0	0	0	0	0	0	0	0	0	0
	Gov Eq 1 (8)	0	0	0	0	0	0	0	0	0	0	0	0	0	0	0.0245877	0.0120277	-0.0480156	0.00106469	0.0235231	-0.0120277	0	0	0	0	0	0	0	0	0	0	0	0	0	0	0	0	0	0	0	0	0	0	0	0	0	0	0	0
	Gov Eq 2 (8)	0	0	0	0	0	0	0	0	0	0	0	0	0	0	-0.0120277	0.633803	0	-1.24252	0.0120277	0.585431	0	0	0	0	0	0	0	0	0	0	0	0	0	0	0	0	0	0	0	0	0	0	0	0	0	0	0	0
	Gov Eq 1 (9)	0	0	0	0	0	0	0	0	0	0	0	0	0	0	0	0	0.0235228	0.0114953	-0.04589	0.00106448	0.0224583	-0.0114953	0	0	0	0	0	0	0	0	0	0	0	0	0	0	0	0	0	0	0	0	0	0	0	0	0	0
	Gov Eq 2 (9)	0	0	0	0	0	0	0	0	0	0	0	0	0	0	0	0	-0.0114953	0.585429	0	-1.14701	0.0114953	0.539307	0	0	0	0	0	0	0	0	0	0	0	0	0	0	0	0	0	0	0	0	0	0	0	0	0	0
	Gov Eq 1 (10)	0	0	0	0	0	0	0	0	0	0	0	0	0	0	0	0	0	0	0.0224581	0.0109637	-0.0437676	0.00106148	0.0213966	-0.0109637	0	0	0	0	0	0	0	0	0	0	0	0	0	0	0	0	0	0	0	0	0	0	0	0
	Gov Eq 2 (10)	0	0	0	0	0	0	0	0	0	0	0	0	0	0	0	0	0	0	-0.0109637	0.539306	0	-1.05602	0.0109637	0.495447	0	0	0	0	0	0	0	0	0	0	0	0	0	0	0	0	0	0	0	0	0	0	0	0
	Gov Eq 1 (11)	0	0	0	0	0	0	0	0	0	0	0	0	0	0	0	0	0	0	0	0	0.0213964	0.0104343	-0.0416539	0.0010558	0.0203406	-0.0104343	0	0	0	0	0	0	0	0	0	0	0	0	0	0	0	0	0	0	0	0	0	0
	Gov Eq 2 (11)	0	0	0	0	0	0	0	0	0	0	0	0	0	0	0	0	0	0	0	0	-0.0104343	0.495447	0	-0.969563	0.0104343	0.453854	0	0	0	0	0	0	0	0	0	0	0	0	0	0	0	0	0	0	0	0	0	0
	Gov Eq 1 (12)	0	0	0	0	0	0	0	0	0	0	0	0	0	0	0	0	0	0	0	0	0	0	0.0203404	0.00990832	-0.0395541	0.00104756	0.0192929	-0.00990832	0	0	0	0	0	0	0	0	0	0	0	0	0	0	0	0	0	0	0	0
	Gov Eq 2 (12)	0	0	0	0	0	0	0	0	0	0	0	0	0	0	0	0	0	0	0	0	0	0	-0.00990832	0.453855	0	-0.887634	0.00990832	0.414518	0	0	0	0	0	0	0	0	0	0	0	0	0	0	0	0	0	0	0	0
	Gov Eq 1 (13)	0	0	0	0	0	0	0	0	0	0	0	0	0	0	0	0	0	0	0	0	0	0	0	0	0.0192927	0.00938711	-0.0374732	0.00103687	0.0182558	-0.00938711	0	0	0	0	0	0	0	0	0	0	0	0	0	0	0	0	0	0
	Gov Eq 2 (13)	0	0	0	0	0	0	0	0	0	0	0	0	0	0	0	0	0	0	0	0	0	0	0	0	-0.00938711	0.41452	0	-0.810207	0.00938711	0.377422	0	0	0	0	0	0	0	0	0	0	0	0	0	0	0	0	0	0
	Gov Eq 1 (14)	0	0	0	0	0	0	0	0	0	0	0	0	0	0	0	0	0	0	0	0	0	0	0	0	0	0	0.0182556	0.00887183	-0.035416	0.00102386	0.0172317	-0.00887183	0	0	0	0	0	0	0	0	0	0	0	0	0	0	0	0
	Gov Eq 2 (14)	0	0	0	0	0	0	0	0	0	0	0	0	0	0	0	0	0	0	0	0	0	0	0	0	0	0	-0.00887183	0.377424	0	-0.73724	0.00887183	0.342536	0	0	0	0	0	0	0	0	0	0	0	0	0	0	0	0
	Gov Eq 1 (15)	0	0	0	0	0	0	0	0	0	0	0	0	0	0	0	0	0	0	0	0	0	0	0	0	0	0	0	0	0.0172316	0.00836362	-0.0333869	0.00100863	0.0162229	-0.00836362	0	0	0	0	0	0	0	0	0	0	0	0	0	0
	Gov Eq 2 (15)	0	0	0	0	0	0	0	0	0	0	0	0	0	0	0	0	0	0	0	0	0	0	0	0	0	0	0	0	-0.00836362	0.342539	0	-0.668667	0.00836362	0.309823	0	0	0	0	0	0	0	0	0	0	0	0	0	0
	Gov Eq 1 (16)	0	0	0	0	0	0	0	0	0	0	0	0	0	0	0	0	0	0	0	0	0	0	0	0	0	0	0	0	0	0	0.0162228	0.00786355	-0.0313904	0.000991314	0.0152314	-0.00786355	0	0	0	0	0	0	0	0	0	0	0	0
	Gov Eq 2 (16)	0	0	0	0	0	0	0	0	0	0	0	0	0	0	0	0	0	0	0	0	0	0	0	0	0	0	0	0	0	0	-0.00786355	0.309827	0	-0.604412	0.00786355	0.27924	0	0	0	0	0	0	0	0	0	0	0	0
	Gov Eq 1 (17)	0	0	0	0	0	0	0	0	0	0	0	0	0	0	0	0	0	0	0	0	0	0	0	0	0	0	0	0	0	0	0	0	0.0152313	0.00737264	-0.0294304	0.000972014	0.0142593	-0.00737264	0	0	0	0	0	0	0	0	0	0
	Gov Eq 2 (17)	0	0	0	0	0	0	0	0	0	0	0	0	0	0	0	0	0	0	0	0	0	0	0	0	0	0	0	0	0	0	0	0	-0.00737264	0.279245	0	-0.544379	0.00737264	0.250735	0	0	0	0	0	0	0	0	0	0
	Gov Eq 1 (18)	0	0	0	0	0	0	0	0	0	0	0	0	0	0	0	0	0	0	0	0	0	0	0	0	0	0	0	0	0	0	0	0	0	0	0.0142591	0.00689184	-0.0275109	0.000950852	0.0133083	-0.00689184	0	0	0	0	0	0	0	0
	Gov Eq 2 (18)	0	0	0	0	0	0	0	0	0	0	0	0	0	0	0	0	0	0	0	0	0	0	0	0	0	0	0	0	0	0	0	0	0	0	-0.00689184	0.25074	0	-0.488463	0.00689184	0.224251	0	0	0	0	0	0	0	0
	Gov Eq 1 (19)	0	0	0	0	0	0	0	0	0	0	0	0	0	0	0	0	0	0	0	0	0	0	0	0	0	0	0	0	0	0	0	0	0	0	0	0	0.0133081	0.00642208	-0.0256353	0.000927944	0.0123802	-0.00642208	0	0	0	0	0	0
	Gov Eq 2 (19)	0	0	0	0	0	0	0	0	0	0	0	0	0	0	0	0	0	0	0	0	0	0	0	0	0	0	0	0	0	0	0	0	0	0	0	0	-0.00642208	0.224256	0	-0.436544	0.00642208	0.199724	0	0	0	0	0	0
	Gov Eq 1 (20)	0	0	0	0	0	0	0	0	0	0	0	0	0	0	0	0	0	0	0	0	0	0	0	0	0	0	0	0	0	0	0	0	0	0	0	0	0	0	0.01238	0.00596417	-0.0238071	0.000903405	0.0114766	-0.00596417	0	0	0	0
	Gov Eq 2 (20)	0	0	0	0	0	0	0	0	0	0	0	0	0	0	0	0	0	0	0	0	0	0	0	0	0	0	0	0	0	0	0	0	0	0	0	0	0	0	-0.00596417	0.19973	0	-0.388494	0.00596417	0.177087	0	0	0	0
	Gov Eq 1 (21)	0	0	0	0	0	0	0	0	0	0	0	0	0	0	0	0	0	0	0	0	0	0	0	0	0	0	0	0	0	0	0	0	0	0	0	0	0	0	0	0	0.0114765	0.00551892	-0.0220295	0.000877354	0.0105992	-0.00551892	0	0
	Gov Eq 2 (21)	0	0	0	0	0	0	0	0	0	0	0	0	0	0	0	0	0	0	0	0	0	0	0	0	0	0	0	0	0	0	0	0	0	0	0	0	0	0	0	0	-0.00551892	0.177093	0	-0.344175	0.00551892	0.156268	0	0
	Gov Eq 1 (22)	0	0	0	0	0	0	0	0	0	0	0	0	0	0	0	0	0	0	0	0	0	0	0	0	0	0	0	0	0	0	0	0	0	0	0	0	0	0	0	0	0	0	0.0105991	0.00508705	-0.0203052	0.000849905	0.00974915	-0.00508705
	Gov Eq 2 (22)	0	0	0	0	0	0	0	0	0	0	0	0	0	0	0	0	0	0	0	0	0	0	0	0	0	0	0	0	0	0	0	0	0	0	0	0	0	0	0	0	0	0	-0.00508705	0.156274	0	-0.303441	0.00508705	0.137192
	Gov Eq 1 (23)	0	0	0	0	0	0	0	0	0	0	0	0	0	0	0	0	0	0	0	0	0	0	0	0	0	0	0	0	0	0	0	0	0	0	0	0	0	0	0	0	0	0	0	0	0.00974905	0.00466923	-0.0186371	0.000821176
	Gov Eq 2 (23)	0	0	0	0	0	0	0	0	0	0	0	0	0	0	0	0	0	0	0	0	0	0	0	0	0	0	0	0	0	0	0	0	0	0	0	0	0	0	0	0	0	0	0	0	-0.00466923	0.137198	0	-0.266142
	Gov Eq 1 (24)	0	0	0	0	0	0	0	0	0	0	0	0	0	0	0	0	0	0	0	0	0	0	0	0	0	0	0	0	0	0	0	0	0	0	0	0	0	0	0	0	0	0	0	0	0	0	0.00892778	0.00426607
	Gov Eq 2 (24)	0	0	0	0	0	0	0	0	0	0	0	0	0	0	0	0	0	0	0	0	0	0	0	0	0	0	0	0	0	0	0	0	0	0	0	0	0	0	0	0	0	0	0	0	0	0	-0.00426607	0.119788
	Gov Eq 1 (25)	0	0	0	0	0	0	0	0	0	0	0	0	0	0	0	0	0	0	0	0	0	0	0	0	0	0	0	0	0	0	0	0	0	0	0	0	0	0	0	0	0	0	0	0	0	0	0	0
	Gov Eq 2 (25)	0	0	0	0	0	0	0	0	0	0	0	0	0	0	0	0	0	0	0	0	0	0	0	0	0	0	0	0	0	0	0	0	0	0	0	0	0	0	0	0	0	0	0	0	0	0	0	0
	Gov Eq 1 (26)	0	0	0	0	0	0	0	0	0	0	0	0	0	0	0	0	0	0	0	0	0	0	0	0	0	0	0	0	0	0	0	0	0	0	0	0	0	0	0	0	0	0	0	0	0	0	0	0
	Gov Eq 2 (26)	0	0	0	0	0	0	0	0	0	0	0	0	0	0	0	0	0	0	0	0	0	0	0	0	0	0	0	0	0	0	0	0	0	0	0	0	0	0	0	0	0	0	0	0	0	0	0	0
	Gov Eq 1 (27)	0	0	0	0	0	0	0	0	0	0	0	0	0	0	0	0	0	0	0	0	0	0	0	0	0	0	0	0	0	0	0	0	0	0	0	0	0	0	0	0	0	0	0	0	0	0	0	0
	Gov Eq 2 (27)	0	0	0	0	0	0	0	0	0	0	0	0	0	0	0	0	0	0	0	0	0	0	0	0	0	0	0	0	0	0	0	0	0	0	0	0	0	0	0	0	0	0	0	0	0	0	0	0
	Gov Eq 1 (28)	0	0	0	0	0	0	0	0	0	0	0	0	0	0	0	0	0	0	0	0	0	0	0	0	0	0	0	0	0	0	0	0	0	0	0	0	0	0	0	0	0	0	0	0	0	0	0	0
	Gov Eq 2 (28)	0	0	0	0	0	0	0	0	0	0	0	0	0	0	0	0	0	0	0	0	0	0	0	0	0	0	0	0	0	0	0	0	0	0	0	0	0	0	0	0	0	0	0	0	0	0	0	0
	Gov Eq 1 (29)	0	0	0	0	0	0	0	0	0	0	0	0	0	0	0	0	0	0	0	0	0	0	0	0	0	0	0	0	0	0	0	0	0	0	0	0	0	0	0	0	0	0	0	0	0	0	0	0
	Gov Eq 2 (29)	0	0	0	0	0	0	0	0	0	0	0	0	0	0	0	0	0	0	0	0	0	0	0	0	0	0	0	0	0	0	0	0	0	0	0	0	0	0	0	0	0	0	0	0	0	0	0	0
	Gov Eq 1 (30)	0	0	0	0	0	0	0	0	0	0	0	0	0	0	0	0	0	0	0	0	0	0	0	0	0	0	0	0	0	0	0	0	0	0	0	0	0	0	0	0	0	0	0	0	0	0	0	0
	Gov Eq 2 (30)	0	0	0	0	0	0	0	0	0	0	0	0	0	0	0	0	0	0	0	0	0	0	0	0	0	0	0	0	0	0	0	0	0	0	0	0	0	0	0	0	0	0	0	0	0	0	0	0
	Gov Eq 1 (31)	0	0	0	0	0	0	0	0	0	0	0	0	0	0	0	0	0	0	0	0	0	0	0	0	0	0	0	0	0	0	0	0	0	0	0	0	0	0	0	0	0	0	0	0	0	0	0	0
	Gov Eq 2 (31)	0	0	0	0	0	0	0	0	0	0	0	0	0	0	0	0	0	0	0	0	0	0	0	0	0	0	0	0	0	0	0	0	0	0	0	0	0	0	0	0	0	0	0	0	0	0	0	0
	Gov Eq 1 (32)	0	0	0	0	0	0	0	0	0	0	0	0	0	0	0	0	0	0	0	0	0	0	0	0	0	0	0	0	0	0	0	0	0	0	0	0	0	0	0	0	0	0	0	0	0	0	0	0
	Gov Eq 2 (32)	0	0	0	0	0	0	0	0	0	0	0	0	0	0	0	0	0	0	0	0	0	0	0	0	0	0	0	0	0	0	0	0	0	0	0	0	0	0	0	0	0	0	0	0	0	0	0	0
	Gov Eq 1 (33)	0	0	0	0	0	0	0	0	0	0	0	0	0	0	0	0	0	0	0	0	0	0	0	0	0	0	0	0	0	0	0	0	0	0	0	0	0	0	0	0	0	0	0	0	0	0	0	0
	Gov Eq 2 (33)	0	0	0	0	0	0	0	0	0	0	0	0	0	0	0	0	0	0	0	0	0	0	0	0	0	0	0	0	0	0	0	0	0	0	0	0	0	0	0	0	0	0	0	0	0	0	0	0
	Bo Co 1 (1)	0	0	1	0	0	0	0	0	0	0	0	0	0	0	0	0	0	0	0	0	0	0	0	0	0	0	0	0	0	0	0	0	0	0	0	0	0	0	0	0	0	0	0	0	0	0	0	0
	Bo Co 2 (1)	0	0	0	1	0	0	0	0	0	0	0	0	0	0	0	0	0	0	0	0	0	0	0	0	0	0	0	0	0	0	0	0	0	0	0	0	0	0	0	0	0	0	0	0	0	0	0	0
	Bo Co 1 (33)	0	0	0	0	0	0	0	0	0	0	0	0	0	0	0	0	0	0	0	0	0	0	0	0	0	0	0	0	0	0	0	0	0	0	0	0	0	0	0	0	0	0	0	0	0	0	0	0
	Bo Co 2 (33)	0	0	0	0	0	0	0	0	0	0	0	0	0	0	0	0	0	0	0	0	0	0	0	0	0	0	0	0	0	0	0	0	0	0	0	0	0	0	0	0	0	0	0	0	0	0	0	0
										Governing equations
	W-F FDM approximation
		49-point grid
	n =	48
		0.0208333
		0.0312		Er = E0 =	200	Gpa
	kRIr =	0.01		E1 =	70	Gpa
				rr = r0 =	5700	kg/m3
		0.0139111		r1 =	2702	kg/m3
		11.3325				Determinant =	0.000318641
					PSM	Shahba et al.	9 pt	17 pt	33 pt	49 pt
		2.41927e-05		0.0557401	11.3145	11.3199	12.092	11.5094	11.36	11.3325
		0.5
			Nodes	1		2		3		4		5		6		7		8		9		10		11		12		13		14		15		16		17		18		19		20		21		22		23
				0		0.0208333		0.0416667		0.0625		0.0833333		0.104167		0.125		0.145833		0.166667		0.1875		0.208333		0.229167		0.25		0.270833		0.291667		0.3125		0.333333		0.354167		0.375		0.395833		0.416667		0.4375		0.458333
				1		0.95898		0.919235		0.880738		0.843464		0.807385		0.772476		0.738712		0.706067		0.674516		0.644034		0.614597		0.586182		0.558763		0.532317		0.506822		0.482253		0.458589		0.435806		0.413883		0.392798		0.372529		0.353055
				1		0.979275		0.958767		0.938477		0.918403		0.898546		0.878906		0.859484		0.840278		0.821289		0.802517		0.783963		0.765625		0.747504		0.729601		0.711914		0.694444		0.677192		0.660156		0.643338		0.626736		0.610352		0.594184
				1		0.999772		0.999087		0.997945		0.996347		0.994293		0.991782		0.988814		0.98539		0.981509		0.977172		0.972378		0.967127		0.96142		0.955256		0.948636		0.941559		0.934026		0.926036		0.91759		0.908687		0.899327		0.889511
				1		0.999718		0.998872		0.997461		0.995486		0.992947		0.989844		0.986176		0.981944		0.977148		0.971788		0.965864		0.959375		0.952322		0.944705		0.936523		0.927778		0.918468		0.908594		0.898155		0.887153		0.875586		0.863455
				-0.0208333		-0.021163		-0.0214582		-0.0217196		-0.0219479		-0.0221439		-0.0223083		-0.0224419		-0.0225453		-0.0226194		-0.0226648		-0.0226822		-0.0226725		-0.0226364		-0.0225745		-0.0224876		-0.0223765		-0.0222419		-0.0220846		-0.0219051		-0.0217044		-0.0214831		-0.021242
				-0.0416667		-0.0409078		-0.0401096		-0.0392759		-0.0384104		-0.0375169		-0.0365987		-0.0356592		-0.0347016		-0.0337288		-0.0327439		-0.0317495		-0.0307484		-0.029743		-0.0287358		-0.027729		-0.0267249		-0.0257253		-0.0247324		-0.0237478		-0.0227732		-0.0218104		-0.0208607
		W0	hkF0	W1	hkF1	W2	hkF2	W3	hkF3	W4	hkF4	W5	hkF5	W6	hkF6	W7	hkF7	W8	hkF8	W9	hkF9	W10	hkF10	W11	hkF11	W12	hkF12	W13	hkF13	W14	hkF14	W15	hkF15	W16	hkF16	W17	hkF17	W18	hkF18	W19	hkF19	W20	hkF20	W21	hkF21	W22	hkF22	W23	hkF23
	Gov Eq 1 (1)	0.0140561	0.00695557	-0.0277981	0.000289816	0.0137662	-0.00695557	0	0	0	0	0	0	0	0	0	0	0	0	0	0	0	0	0	0	0	0	0	0	0	0	0	0	0	0	0	0	0	0	0	0	0	0	0	0	0	0	0	0
	Gov Eq 2 (1)	-0.00695557	1.02083	0	-2.01335	0.00695557	0.979167	0	0	0	0	0	0	0	0	0	0	0	0	0	0	0	0	0	0	0	0	0	0	0	0	0	0	0	0	0	0	0	0	0	0	0	0	0	0	0	0	0	0
	Gov Eq 1 (2)	0	0	0.0137662	0.0068095	-0.0272143	0.000294402	0.0134718	-0.0068095	0	0	0	0	0	0	0	0	0	0	0	0	0	0	0	0	0	0	0	0	0	0	0	0	0	0	0	0	0	0	0	0	0	0	0	0	0	0	0	0
	Gov Eq 2 (2)	0	0	-0.0068095	0.979163	0	-1.9305	0.0068095	0.938255	0	0	0	0	0	0	0	0	0	0	0	0	0	0	0	0	0	0	0	0	0	0	0	0	0	0	0	0	0	0	0	0	0	0	0	0	0	0	0	0
	Gov Eq 1 (3)	0	0	0	0	0.0134718	0.00666125	-0.0266218	0.000298509	0.0131732	-0.00666125	0	0	0	0	0	0	0	0	0	0	0	0	0	0	0	0	0	0	0	0	0	0	0	0	0	0	0	0	0	0	0	0	0	0	0	0	0	0
	Gov Eq 2 (3)	0	0	0	0	-0.00666125	0.938252	0	-1.84921	0.00666125	0.898143	0	0	0	0	0	0	0	0	0	0	0	0	0	0	0	0	0	0	0	0	0	0	0	0	0	0	0	0	0	0	0	0	0	0	0	0	0	0
	Gov Eq 1 (4)	0	0	0	0	0	0	0.0131732	0.00651107	-0.0260216	0.000302145	0.0128711	-0.00651107	0	0	0	0	0	0	0	0	0	0	0	0	0	0	0	0	0	0	0	0	0	0	0	0	0	0	0	0	0	0	0	0	0	0	0	0
	Gov Eq 2 (4)	0	0	0	0	0	0	-0.00651107	0.89814	0	-1.76954	0.00651107	0.858864	0	0	0	0	0	0	0	0	0	0	0	0	0	0	0	0	0	0	0	0	0	0	0	0	0	0	0	0	0	0	0	0	0	0	0	0
	Gov Eq 1 (5)	0	0	0	0	0	0	0	0	0.012871	0.00635918	-0.0254146	0.000305321	0.0125657	-0.00635918	0	0	0	0	0	0	0	0	0	0	0	0	0	0	0	0	0	0	0	0	0	0	0	0	0	0	0	0	0	0	0	0	0	0
	Gov Eq 2 (5)	0	0	0	0	0	0	0	0	-0.00635918	0.858862	0	-1.69156	0.00635918	0.820451	0	0	0	0	0	0	0	0	0	0	0	0	0	0	0	0	0	0	0	0	0	0	0	0	0	0	0	0	0	0	0	0	0	0
	Gov Eq 1 (6)	0	0	0	0	0	0	0	0	0	0	0.0125657	0.00620582	-0.0248017	0.000308048	0.0122576	-0.00620582	0	0	0	0	0	0	0	0	0	0	0	0	0	0	0	0	0	0	0	0	0	0	0	0	0	0	0	0	0	0	0	0
	Gov Eq 2 (6)	0	0	0	0	0	0	0	0	0	0	-0.00620582	0.820449	0	-1.61535	0.00620582	0.782932	0	0	0	0	0	0	0	0	0	0	0	0	0	0	0	0	0	0	0	0	0	0	0	0	0	0	0	0	0	0	0	0
	Gov Eq 1 (7)	0	0	0	0	0	0	0	0	0	0	0	0	0.0122576	0.00605121	-0.0241837	0.000310335	0.0119473	-0.00605121	0	0	0	0	0	0	0	0	0	0	0	0	0	0	0	0	0	0	0	0	0	0	0	0	0	0	0	0	0	0
	Gov Eq 2 (7)	0	0	0	0	0	0	0	0	0	0	0	0	-0.00605121	0.78293	0	-1.54094	0.00605121	0.746331	0	0	0	0	0	0	0	0	0	0	0	0	0	0	0	0	0	0	0	0	0	0	0	0	0	0	0	0	0	0
	Gov Eq 1 (8)	0	0	0	0	0	0	0	0	0	0	0	0	0	0	0.0119472	0.00589556	-0.0235617	0.000312193	0.011635	-0.00589556	0	0	0	0	0	0	0	0	0	0	0	0	0	0	0	0	0	0	0	0	0	0	0	0	0	0	0	0
	Gov Eq 2 (8)	0	0	0	0	0	0	0	0	0	0	0	0	0	0	-0.00589556	0.74633	0	-1.46838	0.00589556	0.71067	0	0	0	0	0	0	0	0	0	0	0	0	0	0	0	0	0	0	0	0	0	0	0	0	0	0	0	0
	Gov Eq 1 (9)	0	0	0	0	0	0	0	0	0	0	0	0	0	0	0	0	0.011635	0.00573909	-0.0229363	0.000313631	0.0113214	-0.00573909	0	0	0	0	0	0	0	0	0	0	0	0	0	0	0	0	0	0	0	0	0	0	0	0	0	0
	Gov Eq 2 (9)	0	0	0	0	0	0	0	0	0	0	0	0	0	0	0	0	-0.00573909	0.710669	0	-1.39773	0.00573909	0.675968	0	0	0	0	0	0	0	0	0	0	0	0	0	0	0	0	0	0	0	0	0	0	0	0	0	0
	Gov Eq 1 (10)	0	0	0	0	0	0	0	0	0	0	0	0	0	0	0	0	0	0	0.0113213	0.005582	-0.0223085	0.000314661	0.0110067	-0.005582	0	0	0	0	0	0	0	0	0	0	0	0	0	0	0	0	0	0	0	0	0	0	0	0
	Gov Eq 2 (10)	0	0	0	0	0	0	0	0	0	0	0	0	0	0	0	0	0	0	-0.005582	0.675966	0	-1.329	0.005582	0.642238	0	0	0	0	0	0	0	0	0	0	0	0	0	0	0	0	0	0	0	0	0	0	0	0
	Gov Eq 1 (11)	0	0	0	0	0	0	0	0	0	0	0	0	0	0	0	0	0	0	0	0	0.0110066	0.00542449	-0.021679	0.000315293	0.0106913	-0.00542449	0	0	0	0	0	0	0	0	0	0	0	0	0	0	0	0	0	0	0	0	0	0
	Gov Eq 2 (11)	0	0	0	0	0	0	0	0	0	0	0	0	0	0	0	0	0	0	0	0	-0.00542449	0.642237	0	-1.26223	0.00542449	0.609493	0	0	0	0	0	0	0	0	0	0	0	0	0	0	0	0	0	0	0	0	0	0
	Gov Eq 1 (12)	0	0	0	0	0	0	0	0	0	0	0	0	0	0	0	0	0	0	0	0	0	0	0.0106913	0.00526677	-0.0210486	0.000315536	0.0103758	-0.00526677	0	0	0	0	0	0	0	0	0	0	0	0	0	0	0	0	0	0	0	0
	Gov Eq 2 (12)	0	0	0	0	0	0	0	0	0	0	0	0	0	0	0	0	0	0	0	0	0	0	-0.00526677	0.609492	0	-1.19744	0.00526677	0.577743	0	0	0	0	0	0	0	0	0	0	0	0	0	0	0	0	0	0	0	0
	Gov Eq 1 (13)	0	0	0	0	0	0	0	0	0	0	0	0	0	0	0	0	0	0	0	0	0	0	0	0	0.0103757	0.00510902	-0.0204182	0.000315401	0.0100603	-0.00510902	0	0	0	0	0	0	0	0	0	0	0	0	0	0	0	0	0	0
	Gov Eq 2 (13)	0	0	0	0	0	0	0	0	0	0	0	0	0	0	0	0	0	0	0	0	0	0	0	0	-0.00510902	0.577742	0	-1.13464	0.00510902	0.546994	0	0	0	0	0	0	0	0	0	0	0	0	0	0	0	0	0	0
	Gov Eq 1 (14)	0	0	0	0	0	0	0	0	0	0	0	0	0	0	0	0	0	0	0	0	0	0	0	0	0	0	0.0100603	0.00495143	-0.0197883	0.000314898	0.00974541	-0.00495143	0	0	0	0	0	0	0	0	0	0	0	0	0	0	0	0
	Gov Eq 2 (14)	0	0	0	0	0	0	0	0	0	0	0	0	0	0	0	0	0	0	0	0	0	0	0	0	0	0	-0.00495143	0.546994	0	-1.07385	0.00495143	0.517251	0	0	0	0	0	0	0	0	0	0	0	0	0	0	0	0
	Gov Eq 1 (15)	0	0	0	0	0	0	0	0	0	0	0	0	0	0	0	0	0	0	0	0	0	0	0	0	0	0	0	0	0.00974538	0.00479418	-0.0191599	0.000314037	0.00943134	-0.00479418	0	0	0	0	0	0	0	0	0	0	0	0	0	0
	Gov Eq 2 (15)	0	0	0	0	0	0	0	0	0	0	0	0	0	0	0	0	0	0	0	0	0	0	0	0	0	0	0	0	-0.00479418	0.517251	0	-1.01507	0.00479418	0.488515	0	0	0	0	0	0	0	0	0	0	0	0	0	0
	Gov Eq 1 (16)	0	0	0	0	0	0	0	0	0	0	0	0	0	0	0	0	0	0	0	0	0	0	0	0	0	0	0	0	0	0	0.00943131	0.00463745	-0.0185335	0.000312829	0.00911848	-0.00463745	0	0	0	0	0	0	0	0	0	0	0	0
	Gov Eq 2 (16)	0	0	0	0	0	0	0	0	0	0	0	0	0	0	0	0	0	0	0	0	0	0	0	0	0	0	0	0	0	0	-0.00463745	0.488515	0	-0.958308	0.00463745	0.460786	0	0	0	0	0	0	0	0	0	0	0	0
	Gov Eq 1 (17)	0	0	0	0	0	0	0	0	0	0	0	0	0	0	0	0	0	0	0	0	0	0	0	0	0	0	0	0	0	0	0	0	0.00911846	0.00448141	-0.0179098	0.000311283	0.00880717	-0.00448141	0	0	0	0	0	0	0	0	0	0
	Gov Eq 2 (17)	0	0	0	0	0	0	0	0	0	0	0	0	0	0	0	0	0	0	0	0	0	0	0	0	0	0	0	0	0	0	0	0	-0.00448141	0.460786	0	-0.903557	0.00448141	0.434061	0	0	0	0	0	0	0	0	0	0
	Gov Eq 1 (18)	0	0	0	0	0	0	0	0	0	0	0	0	0	0	0	0	0	0	0	0	0	0	0	0	0	0	0	0	0	0	0	0	0	0	0.00880715	0.00432622	-0.0172896	0.000309411	0.00849774	-0.00432622	0	0	0	0	0	0	0	0
	Gov Eq 2 (18)	0	0	0	0	0	0	0	0	0	0	0	0	0	0	0	0	0	0	0	0	0	0	0	0	0	0	0	0	0	0	0	0	0	0	-0.00432622	0.434062	0	-0.850812	0.00432622	0.408336	0	0	0	0	0	0	0	0
	Gov Eq 1 (19)	0	0	0	0	0	0	0	0	0	0	0	0	0	0	0	0	0	0	0	0	0	0	0	0	0	0	0	0	0	0	0	0	0	0	0	0	0.00849771	0.00417205	-0.0166734	0.000307221	0.00819049	-0.00417205	0	0	0	0	0	0
	Gov Eq 2 (19)	0	0	0	0	0	0	0	0	0	0	0	0	0	0	0	0	0	0	0	0	0	0	0	0	0	0	0	0	0	0	0	0	0	0	0	0	-0.00417205	0.408337	0	-0.800061	0.00417205	0.383605	0	0	0	0	0	0
	Gov Eq 1 (20)	0	0	0	0	0	0	0	0	0	0	0	0	0	0	0	0	0	0	0	0	0	0	0	0	0	0	0	0	0	0	0	0	0	0	0	0	0	0	0.00819046	0.00401905	-0.0160619	0.000304725	0.00788574	-0.00401905	0	0	0	0
	Gov Eq 2 (20)	0	0	0	0	0	0	0	0	0	0	0	0	0	0	0	0	0	0	0	0	0	0	0	0	0	0	0	0	0	0	0	0	0	0	0	0	0	0	-0.00401905	0.383605	0	-0.75129	0.00401905	0.359858	0	0	0	0
	Gov Eq 1 (21)	0	0	0	0	0	0	0	0	0	0	0	0	0	0	0	0	0	0	0	0	0	0	0	0	0	0	0	0	0	0	0	0	0	0	0	0	0	0	0	0	0.00788571	0.00386737	-0.0154557	0.000301933	0.00758378	-0.00386737	0	0
	Gov Eq 2 (21)	0	0	0	0	0	0	0	0	0	0	0	0	0	0	0	0	0	0	0	0	0	0	0	0	0	0	0	0	0	0	0	0	0	0	0	0	0	0	0	0	-0.00386737	0.359859	0	-0.70448	0.00386737	0.337085	0	0
	Gov Eq 1 (22)	0	0	0	0	0	0	0	0	0	0	0	0	0	0	0	0	0	0	0	0	0	0	0	0	0	0	0	0	0	0	0	0	0	0	0	0	0	0	0	0	0	0	0.00758376	0.00371716	-0.0148554	0.000298855	0.0072849	-0.00371716
	Gov Eq 2 (22)	0	0	0	0	0	0	0	0	0	0	0	0	0	0	0	0	0	0	0	0	0	0	0	0	0	0	0	0	0	0	0	0	0	0	0	0	0	0	0	0	0	0	-0.00371716	0.337086	0	-0.65961	0.00371716	0.315276
	Gov Eq 1 (23)	0	0	0	0	0	0	0	0	0	0	0	0	0	0	0	0	0	0	0	0	0	0	0	0	0	0	0	0	0	0	0	0	0	0	0	0	0	0	0	0	0	0	0	0	0.00728488	0.00356856	-0.0142615	0.0002955
	Gov Eq 2 (23)	0	0	0	0	0	0	0	0	0	0	0	0	0	0	0	0	0	0	0	0	0	0	0	0	0	0	0	0	0	0	0	0	0	0	0	0	0	0	0	0	0	0	0	0	-0.00356856	0.315277	0	-0.616656
	Gov Eq 1 (24)	0	0	0	0	0	0	0	0	0	0	0	0	0	0	0	0	0	0	0	0	0	0	0	0	0	0	0	0	0	0	0	0	0	0	0	0	0	0	0	0	0	0	0	0	0	0	0.00698936	0.00342171
	Gov Eq 2 (24)	0	0	0	0	0	0	0	0	0	0	0	0	0	0	0	0	0	0	0	0	0	0	0	0	0	0	0	0	0	0	0	0	0	0	0	0	0	0	0	0	0	0	0	0	0	0	-0.00342171	0.294418
	Gov Eq 1 (25)	0	0	0	0	0	0	0	0	0	0	0	0	0	0	0	0	0	0	0	0	0	0	0	0	0	0	0	0	0	0	0	0	0	0	0	0	0	0	0	0	0	0	0	0	0	0	0	0
	Gov Eq 2 (25)	0	0	0	0	0	0	0	0	0	0	0	0	0	0	0	0	0	0	0	0	0	0	0	0	0	0	0	0	0	0	0	0	0	0	0	0	0	0	0	0	0	0	0	0	0	0	0	0
	Gov Eq 1 (26)	0	0	0	0	0	0	0	0	0	0	0	0	0	0	0	0	0	0	0	0	0	0	0	0	0	0	0	0	0	0	0	0	0	0	0	0	0	0	0	0	0	0	0	0	0	0	0	0
	Gov Eq 2 (26)	0	0	0	0	0	0	0	0	0	0	0	0	0	0	0	0	0	0	0	0	0	0	0	0	0	0	0	0	0	0	0	0	0	0	0	0	0	0	0	0	0	0	0	0	0	0	0	0
	Gov Eq 1 (27)	0	0	0	0	0	0	0	0	0	0	0	0	0	0	0	0	0	0	0	0	0	0	0	0	0	0	0	0	0	0	0	0	0	0	0	0	0	0	0	0	0	0	0	0	0	0	0	0
	Gov Eq 2 (27)	0	0	0	0	0	0	0	0	0	0	0	0	0	0	0	0	0	0	0	0	0	0	0	0	0	0	0	0	0	0	0	0	0	0	0	0	0	0	0	0	0	0	0	0	0	0	0	0
	Gov Eq 1 (28)	0	0	0	0	0	0	0	0	0	0	0	0	0	0	0	0	0	0	0	0	0	0	0	0	0	0	0	0	0	0	0	0	0	0	0	0	0	0	0	0	0	0	0	0	0	0	0	0
	Gov Eq 2 (28)	0	0	0	0	0	0	0	0	0	0	0	0	0	0	0	0	0	0	0	0	0	0	0	0	0	0	0	0	0	0	0	0	0	0	0	0	0	0	0	0	0	0	0	0	0	0	0	0
	Gov Eq 1 (29)	0	0	0	0	0	0	0	0	0	0	0	0	0	0	0	0	0	0	0	0	0	0	0	0	0	0	0	0	0	0	0	0	0	0	0	0	0	0	0	0	0	0	0	0	0	0	0	0
	Gov Eq 2 (29)	0	0	0	0	0	0	0	0	0	0	0	0	0	0	0	0	0	0	0	0	0	0	0	0	0	0	0	0	0	0	0	0	0	0	0	0	0	0	0	0	0	0	0	0	0	0	0	0
	Gov Eq 1 (30)	0	0	0	0	0	0	0	0	0	0	0	0	0	0	0	0	0	0	0	0	0	0	0	0	0	0	0	0	0	0	0	0	0	0	0	0	0	0	0	0	0	0	0	0	0	0	0	0
	Gov Eq 2 (30)	0	0	0	0	0	0	0	0	0	0	0	0	0	0	0	0	0	0	0	0	0	0	0	0	0	0	0	0	0	0	0	0	0	0	0	0	0	0	0	0	0	0	0	0	0	0	0	0
	Gov Eq 1 (31)	0	0	0	0	0	0	0	0	0	0	0	0	0	0	0	0	0	0	0	0	0	0	0	0	0	0	0	0	0	0	0	0	0	0	0	0	0	0	0	0	0	0	0	0	0	0	0	0
	Gov Eq 2 (31)	0	0	0	0	0	0	0	0	0	0	0	0	0	0	0	0	0	0	0	0	0	0	0	0	0	0	0	0	0	0	0	0	0	0	0	0	0	0	0	0	0	0	0	0	0	0	0	0
	Gov Eq 1 (32)	0	0	0	0	0	0	0	0	0	0	0	0	0	0	0	0	0	0	0	0	0	0	0	0	0	0	0	0	0	0	0	0	0	0	0	0	0	0	0	0	0	0	0	0	0	0	0	0
	Gov Eq 2 (32)	0	0	0	0	0	0	0	0	0	0	0	0	0	0	0	0	0	0	0	0	0	0	0	0	0	0	0	0	0	0	0	0	0	0	0	0	0	0	0	0	0	0	0	0	0	0	0	0
	Gov Eq 1 (33)	0	0	0	0	0	0	0	0	0	0	0	0	0	0	0	0	0	0	0	0	0	0	0	0	0	0	0	0	0	0	0	0	0	0	0	0	0	0	0	0	0	0	0	0	0	0	0	0
	Gov Eq 2 (33)	0	0	0	0	0	0	0	0	0	0	0	0	0	0	0	0	0	0	0	0	0	0	0	0	0	0	0	0	0	0	0	0	0	0	0	0	0	0	0	0	0	0	0	0	0	0	0	0
	Gov Eq 1 (34)	0	0	0	0	0	0	0	0	0	0	0	0	0	0	0	0	0	0	0	0	0	0	0	0	0	0	0	0	0	0	0	0	0	0	0	0	0	0	0	0	0	0	0	0	0	0	0	0
	Gov Eq 2 (34)	0	0	0	0	0	0	0	0	0	0	0	0	0	0	0	0	0	0	0	0	0	0	0	0	0	0	0	0	0	0	0	0	0	0	0	0	0	0	0	0	0	0	0	0	0	0	0	0
	Gov Eq 1 (35)	0	0	0	0	0	0	0	0	0	0	0	0	0	0	0	0	0	0	0	0	0	0	0	0	0	0	0	0	0	0	0	0	0	0	0	0	0	0	0	0	0	0	0	0	0	0	0	0
	Gov Eq 2 (35)	0	0	0	0	0	0	0	0	0	0	0	0	0	0	0	0	0	0	0	0	0	0	0	0	0	0	0	0	0	0	0	0	0	0	0	0	0	0	0	0	0	0	0	0	0	0	0	0
	Gov Eq 1 (36)	0	0	0	0	0	0	0	0	0	0	0	0	0	0	0	0	0	0	0	0	0	0	0	0	0	0	0	0	0	0	0	0	0	0	0	0	0	0	0	0	0	0	0	0	0	0	0	0
	Gov Eq 2 (36)	0	0	0	0	0	0	0	0	0	0	0	0	0	0	0	0	0	0	0	0	0	0	0	0	0	0	0	0	0	0	0	0	0	0	0	0	0	0	0	0	0	0	0	0	0	0	0	0
	Gov Eq 1 (37)	0	0	0	0	0	0	0	0	0	0	0	0	0	0	0	0	0	0	0	0	0	0	0	0	0	0	0	0	0	0	0	0	0	0	0	0	0	0	0	0	0	0	0	0	0	0	0	0
	Gov Eq 2 (37)	0	0	0	0	0	0	0	0	0	0	0	0	0	0	0	0	0	0	0	0	0	0	0	0	0	0	0	0	0	0	0	0	0	0	0	0	0	0	0	0	0	0	0	0	0	0	0	0
	Gov Eq 1 (38)	0	0	0	0	0	0	0	0	0	0	0	0	0	0	0	0	0	0	0	0	0	0	0	0	0	0	0	0	0	0	0	0	0	0	0	0	0	0	0	0	0	0	0	0	0	0	0	0
	Gov Eq 2 (38)	0	0	0	0	0	0	0	0	0	0	0	0	0	0	0	0	0	0	0	0	0	0	0	0	0	0	0	0	0	0	0	0	0	0	0	0	0	0	0	0	0	0	0	0	0	0	0	0
	Gov Eq 1 (39)	0	0	0	0	0	0	0	0	0	0	0	0	0	0	0	0	0	0	0	0	0	0	0	0	0	0	0	0	0	0	0	0	0	0	0	0	0	0	0	0	0	0	0	0	0	0	0	0
	Gov Eq 2 (39)	0	0	0	0	0	0	0	0	0	0	0	0	0	0	0	0	0	0	0	0	0	0	0	0	0	0	0	0	0	0	0	0	0	0	0	0	0	0	0	0	0	0	0	0	0	0	0	0
	Gov Eq 1 (40)	0	0	0	0	0	0	0	0	0	0	0	0	0	0	0	0	0	0	0	0	0	0	0	0	0	0	0	0	0	0	0	0	0	0	0	0	0	0	0	0	0	0	0	0	0	0	0	0
	Gov Eq 2 (40)	0	0	0	0	0	0	0	0	0	0	0	0	0	0	0	0	0	0	0	0	0	0	0	0	0	0	0	0	0	0	0	0	0	0	0	0	0	0	0	0	0	0	0	0	0	0	0	0
	Gov Eq 1 (41)	0	0	0	0	0	0	0	0	0	0	0	0	0	0	0	0	0	0	0	0	0	0	0	0	0	0	0	0	0	0	0	0	0	0	0	0	0	0	0	0	0	0	0	0	0	0	0	0
	Gov Eq 2 (41)	0	0	0	0	0	0	0	0	0	0	0	0	0	0	0	0	0	0	0	0	0	0	0	0	0	0	0	0	0	0	0	0	0	0	0	0	0	0	0	0	0	0	0	0	0	0	0	0
	Gov Eq 1 (42)	0	0	0	0	0	0	0	0	0	0	0	0	0	0	0	0	0	0	0	0	0	0	0	0	0	0	0	0	0	0	0	0	0	0	0	0	0	0	0	0	0	0	0	0	0	0	0	0
	Gov Eq 2 (42)	0	0	0	0	0	0	0	0	0	0	0	0	0	0	0	0	0	0	0	0	0	0	0	0	0	0	0	0	0	0	0	0	0	0	0	0	0	0	0	0	0	0	0	0	0	0	0	0
	Gov Eq 1 (43)	0	0	0	0	0	0	0	0	0	0	0	0	0	0	0	0	0	0	0	0	0	0	0	0	0	0	0	0	0	0	0	0	0	0	0	0	0	0	0	0	0	0	0	0	0	0	0	0
	Gov Eq 2 (43)	0	0	0	0	0	0	0	0	0	0	0	0	0	0	0	0	0	0	0	0	0	0	0	0	0	0	0	0	0	0	0	0	0	0	0	0	0	0	0	0	0	0	0	0	0	0	0	0
	Gov Eq 1 (44)	0	0	0	0	0	0	0	0	0	0	0	0	0	0	0	0	0	0	0	0	0	0	0	0	0	0	0	0	0	0	0	0	0	0	0	0	0	0	0	0	0	0	0	0	0	0	0	0
	Gov Eq 2 (44)	0	0	0	0	0	0	0	0	0	0	0	0	0	0	0	0	0	0	0	0	0	0	0	0	0	0	0	0	0	0	0	0	0	0	0	0	0	0	0	0	0	0	0	0	0	0	0	0
	Gov Eq 1 (45)	0	0	0	0	0	0	0	0	0	0	0	0	0	0	0	0	0	0	0	0	0	0	0	0	0	0	0	0	0	0	0	0	0	0	0	0	0	0	0	0	0	0	0	0	0	0	0	0
	Gov Eq 2 (45)	0	0	0	0	0	0	0	0	0	0	0	0	0	0	0	0	0	0	0	0	0	0	0	0	0	0	0	0	0	0	0	0	0	0	0	0	0	0	0	0	0	0	0	0	0	0	0	0
	Gov Eq 1 (46)	0	0	0	0	0	0	0	0	0	0	0	0	0	0	0	0	0	0	0	0	0	0	0	0	0	0	0	0	0	0	0	0	0	0	0	0	0	0	0	0	0	0	0	0	0	0	0	0
	Gov Eq 2 (46)	0	0	0	0	0	0	0	0	0	0	0	0	0	0	0	0	0	0	0	0	0	0	0	0	0	0	0	0	0	0	0	0	0	0	0	0	0	0	0	0	0	0	0	0	0	0	0	0
	Gov Eq 1 (47)	0	0	0	0	0	0	0	0	0	0	0	0	0	0	0	0	0	0	0	0	0	0	0	0	0	0	0	0	0	0	0	0	0	0	0	0	0	0	0	0	0	0	0	0	0	0	0	0
	Gov Eq 2 (47)	0	0	0	0	0	0	0	0	0	0	0	0	0	0	0	0	0	0	0	0	0	0	0	0	0	0	0	0	0	0	0	0	0	0	0	0	0	0	0	0	0	0	0	0	0	0	0	0
	Gov Eq 1 (48)	0	0	0	0	0	0	0	0	0	0	0	0	0	0	0	0	0	0	0	0	0	0	0	0	0	0	0	0	0	0	0	0	0	0	0	0	0	0	0	0	0	0	0	0	0	0	0	0
	Gov Eq 2 (48)	0	0	0	0	0	0	0	0	0	0	0	0	0	0	0	0	0	0	0	0	0	0	0	0	0	0	0	0	0	0	0	0	0	0	0	0	0	0	0	0	0	0	0	0	0	0	0	0
	Gov Eq 1 (49)	0	0	0	0	0	0	0	0	0	0	0	0	0	0	0	0	0	0	0	0	0	0	0	0	0	0	0	0	0	0	0	0	0	0	0	0	0	0	0	0	0	0	0	0	0	0	0	0
	Gov Eq 2 (49)	0	0	0	0	0	0	0	0	0	0	0	0	0	0	0	0	0	0	0	0	0	0	0	0	0	0	0	0	0	0	0	0	0	0	0	0	0	0	0	0	0	0	0	0	0	0	0	0
	Bo Co 1 (1)	0	0	1	0	0	0	0	0	0	0	0	0	0	0	0	0	0	0	0	0	0	0	0	0	0	0	0	0	0	0	0	0	0	0	0	0	0	0	0	0	0	0	0	0	0	0	0	0
	Bo Co 2 (1)	0	0	0	1	0	0	0	0	0	0	0	0	0	0	0	0	0	0	0	0	0	0	0	0	0	0	0	0	0	0	0	0	0	0	0	0	0	0	0	0	0	0	0	0	0	0	0	0
	Bo Co 1 (49)	0	0	0	0	0	0	0	0	0	0	0	0	0	0	0	0	0	0	0	0	0	0	0	0	0	0	0	0	0	0	0	0	0	0	0	0	0	0	0	0	0	0	0	0	0	0	0	0
	Bo Co 2 (49)	0	0	0	0	0	0	0	0	0	0	0	0	0	0	0	0	0	0	0	0	0	0	0	0	0	0	0	0	0	0	0	0	0	0	0	0	0	0	0	0	0	0	0	0	0	0	0	0
[truncated: 54 more columns]
